# Supplementary material for: Dual luminescence and infrared circularly polarized luminescence up to 900 nm with platinum complexes bearing a helical donor–acceptor ligand
Source: Royal Society of Chemistry journal article supplement (doi:10.1039/d4qm00632a), 2024-01-01
Supplement: d4qm00632a1.pdf [file d4qm00632a1.pdf]

## Electronic Supporting Information

### Dual luminescence and infrared circularly polarized luminescence up to 900 nm with platinum complexes bearing helical donor-acceptor ligand

Pablo Vázquez-Domínguez,<sup>†a,b</sup> Maher Horojat,<sup>†c</sup> Eva Suits,<sup>a</sup> Francisco José Fernández de Córdova,<sup>a</sup> Nicolas Vanthuyne,<sup>d</sup> Denis Jacquemin,<sup>\*e,f</sup> Abel Ros,<sup>\*a</sup> and Ludovic Favereau<sup>\*c</sup>

*a* Institute for Chemical Research (CSIC-US) C/Américo Vespucio 49, E-41092 Seville (Spain). E-mail: [abel.ros@iig.csic.es](mailto:abel.ros@iig.csic.es).

*b* Department of Organic Chemistry, Innovation Centre in Advanced Chemistry, ORFEO-CINQA, University of Seville, C/Prof. García González 1, 41012 Seville, Spain

*c* Univ Rennes, CNRS, ISCR-UMR 6226, F-35000 Rennes, France. E-mail: [ludovic.favereau@univ-rennes.fr](mailto:ludovic.favereau@univ-rennes.fr)

*d* Aix Marseille University, CNRS, Centrale Marseille, iSm2, Marseille, France

*e* Nantes Université, CNRS, CEISAM UMR 6230, F-44000 Nantes, France. E-mail : [Denis.Jacquemin@univ-nantes.fr](mailto:Denis.Jacquemin@univ-nantes.fr)

*f* Institut Universitaire de France (IUF), F-75005, Paris, France

<sup>†</sup> These authors contributed equally

### Table of Contents

|                                                                    |            |
|--------------------------------------------------------------------|------------|
| <b>1. General Information</b>                                      | <b>S2</b>  |
| <b>2. Synthesis of ligands</b>                                     | <b>S4</b>  |
| <b>3. Synthesis of Pt-complexes 1-6 and 5(acac)-6(acac)</b>        | <b>S10</b> |
| <b>4. NMR spectra</b>                                              | <b>S15</b> |
| <b>5. UV-vis spectra of ligands and lifetime characterizations</b> | <b>S36</b> |
| <b>6. Chiral HPLC separation</b>                                   | <b>S52</b> |
| <b>7. Computational methods</b>                                    | <b>S68</b> |

# 1. General Information

## General information and materials

Anhydrous 1,4-dioxane were obtained by distillation over Na/benzophenone. Other solvents such as cyclohexane, ethyl acetate (EtOAc), dichloromethane (DCM), chloroform, dimethoxyethane (DME), toluene, and isopropanol were purchased in chromatographic purity and used as received. Bromoisoquinoline and boronic acids was supplied by BLDpharm, and [Pd(PPh<sub>3</sub>)<sub>4</sub>] and Na(acac) were provided by Strem and Alfa Aesar, respectively. [Pt(DMSO)<sub>2</sub>Cl<sub>2</sub>] was synthesized according to previously described methodology.<sup>1</sup>

All synthetic transformations were done in oven-dried Schlenk tubes under inert (N<sub>2</sub>) atmosphere. Thin-layer chromatography (TLC) was performed on aluminum sheets precoated with Merck 5735 Kieselgel 60F254. Column chromatography was carried out with Merck 5735 Kieselgel 60F (0.040-0.063 mm mesh). Chemicals were purchased from Sigma-Aldrich, Alfa Aesar or TCI Europe and used as received.

The <sup>1</sup>H- and <sup>13</sup>C-NMR spectra were measured on a DRX-400 spectrometer (Bruker) at 400 MHz or 100 MHz, and on an *AVANCE III 400 BRUKER* or an *AVANCE I 500 BRUKER* at Centre Régional de Mesures Physiques de l'Ouest (CRMPO), Université de Rennes 1. Chemical shifts  $\delta$  are given in ppm and coupling constants *J* in Hz. <sup>1</sup>H and <sup>13</sup>C chemical shifts were referenced to the residual solvent peak (7.26 and 77.1 ppm respectively). <sup>31</sup>P NMR spectra were referenced to an external 85% solution of H<sub>3</sub>PO<sub>4</sub>. Multiplicity of signals: s – singlet, d – doublet, t – triplet, q – quartet, br s – broad signal, m – multiplet.

Low-temperature diffraction data were collected on a Bruker D8 Quest APEX-III single crystal diffractometer, equipped with a Photon III detector and a I $\mu$ S 3.0 microfocus X-ray source. Data were collected by means of  $\omega$  and  $\varphi$  scans using monochromatic radiation  $\lambda(\text{Mo K}\alpha 1) = 0.71073 \text{ \AA}$ . The diffraction images collected were processed and scaled using APEX-4 v2021.4-0 software. The structures were solved with SHELXT and was refined against F<sup>2</sup> on all data by full-matrix least squares with SHELXL<sup>5</sup> using Olex2 as graphical interface.<sup>6</sup> All non-hydrogen atoms were refined anisotropically. Hydrogen atoms were included in the model at

---

<sup>1</sup> Romeo, R.; Scolaro, L. M. *Inorg. Synth.*, **1998**, 32, 153-158.

geometrically calculated positions and refined using a riding model, unless otherwise noted. The isotropic displacement parameters of all hydrogen atoms were fixed to 1.2 times the U value of the atoms to which they are linked (1.5 times for methyl groups).

High-resolution mass (HR-MS) determinations were performed at CRMPO on a Bruker MaXis 4G by ASAP (+ or -) or ESI and MALDI with  $\text{CH}_2\text{Cl}_2$  as solvent techniques. Experimental and calculated masses are given with consideration of the mass of the electron.

UV-Visible (UV-vis, in  $\text{M}^{-1} \text{cm}^{-1}$ ) absorption spectra were recorded on a UV-2401PC Shimadzu spectrophotometer. Steady-state luminescence spectra were measured using an Edinburgh FS920 Fluorimeter combined with a FL920 Fluorescence Lifetime Spectrometer. The spectra were corrected for the wavelength dependence of the detector, and the quoted emission maxima refer to the values after correction. Life-times measurements were conducted with 375 nm diode laser excitation (EPL-series) plugged to a TCSPC pulsed source interface. Absolute fluorescence quantum yields  $\phi$  were recorded with a Hamamatsu C9920-03 integrating sphere.

Electronic circular dichroism (ECD, in  $\text{M}^{-1}\text{cm}^{-1}$ ) was measured on a Jasco J-1700 Circular Dichroism Spectrometer. The absorption and ECD spectra of the complexes have been measured in both dichloromethane and toluene, which afforded similar responses. The data in dichloromethane are shown to have the full spectra in the UV region, specially to see the complete ECD couplet signal from the binaphthyl unit around 250 nm (UV cut off of toluene is around 290 nm).

The circularly polarized luminescence (CPL) measurements were performed using a JASCO 300 CPL spectrofluoropolarimeter. The following parameters were used: emission slit width  $\approx 20$  nm, integration time = 4 sec, scan speed = 50 nm/min, accumulations = 8. The concentration of all the samples was *ca.*  $10^{-5}$ – $10^{-6}$  M. Excitation of the samples was performed at 380 nm.

## 2. Synthesis of the ligands.

The ligands **L1** and **L5-L6** were synthesized following previously described procedures,<sup>2</sup> and these were applied for the synthesis of the other ligands **L2-L4**.

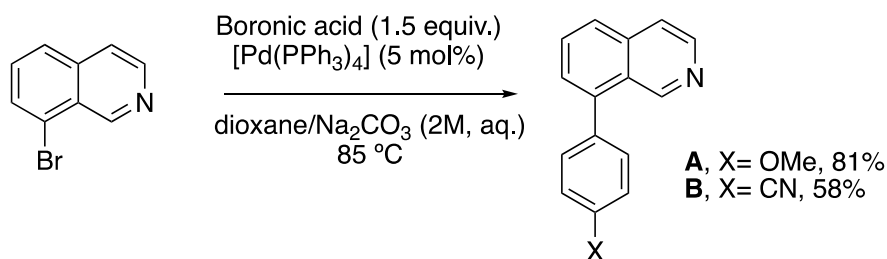

*General procedure for the synthesis of A-B:* A Schlenk tube was charged with 8-bromoisoquinoline (1 eq), boronic acid (1.5 eq) and [Pd(PPh<sub>3</sub>)<sub>4</sub>] (5 mol%). After N<sub>2</sub>/vacuum cycles (3x), deoxygenated 1,4-dioxane (4mL/mmol) and a deoxygenated 2 M solution of Na<sub>2</sub>CO<sub>3</sub> in water (2mL/mmol) were added, and the resulting reaction mixture was stirred at 85 °C for 16h. The reaction mixture was then cooled to rt, diluted in water (20 mL) and extracted with EtOAc (3 x 10 mL). The combined organic phases were dried with MgSO<sub>4</sub>, filtered and evaporated under reduced pressure. The resulting crude was purified by column chromatography on silica gel.

### Synthesis of A.

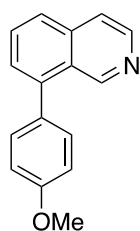

Following the *general procedure* starting from 5 mmol of 8-bromoisoquinoline, purification by flash chromatography (Cyclohexane/EtOAc 2:1) afforded **A** as a white solid (952 mg, 81%). **<sup>1</sup>H-RMN (400 MHz, CDCl<sub>3</sub>, 298K):** δ 9.34 (s, 1H, 8.54 (d, 1H, *J* = 5.4 Hz), 7.79 (d, 1H, *J* = 8.1 Hz) 7.73-7.69 (m, 2H), 7.51 (d, 1H, *J* = 7.0 Hz), 7.44 (d, 2H, *J* = 8.4 Hz), 7.05 (d, 2H, *J* = 8.4 Hz), 3.90 (s, 3H, OMe). **<sup>13</sup>C-RMN (100 MHz, CDCl<sub>3</sub>, 298K):** δ 159.4, 151.1, 142.6, 140.8, 136.3, 131.2 (2xC), 130.9, 130.0, 128.2, 126.8, 125.6, 120.6, 114.0 (2xC), 55.4 (OMe). **HRMS(ESI)** calculated for C<sub>16</sub>H<sub>14</sub>NO (M + H<sup>+</sup>) 236.1070. Found 236.1068.

<sup>2</sup> Vázquez-Domínguez, P.; Rizo, J. F.; Arteaga, J. F.; Jacquemin, D.; Favereau, L.; Ros, A.; Pischel, U. *Org. Chem. Front.*, **2024**, *11*, 843-853.

### Synthesis of **B**.

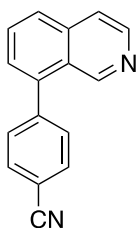

Following the *general procedure* starting from 5 mmol of 8-bromoisoquinoline, purification by flash chromatography (Cyclohexane/EtOAc 2:1→EtOAc) afforded **B** as a white solid (667 mg, 58%). **<sup>1</sup>H-RMN (400 MHz, CDCl<sub>3</sub>, 298K):** δ 9.21 (s, 1H), 8.60 (br s, 1H), 7.91 (d, 1H, *J* = 8.2 Hz), 7.83 (d, 2H, *J* = 8.2 Hz), 7.80-7.76 (m, 2H), 7.64 (d, 2H, *J* = 8.2 Hz), 7.53 (d, 1H, *J* = 7.0 Hz). **<sup>13</sup>C-RMN (100 MHz, CDCl<sub>3</sub>, 298K):** δ 150.0, 143.3, 142.8, 139.0, 136.3, 132.4 (2xC), 130.8 (2xC), 130.1, 128.4, 127.6, 120.9, 118.6 (CN), 112.0. **HRMS(ESI)** calculated for C<sub>16</sub>H<sub>11</sub>N<sub>2</sub> (M + H<sup>+</sup>) 231.0917. Found 231.0919.

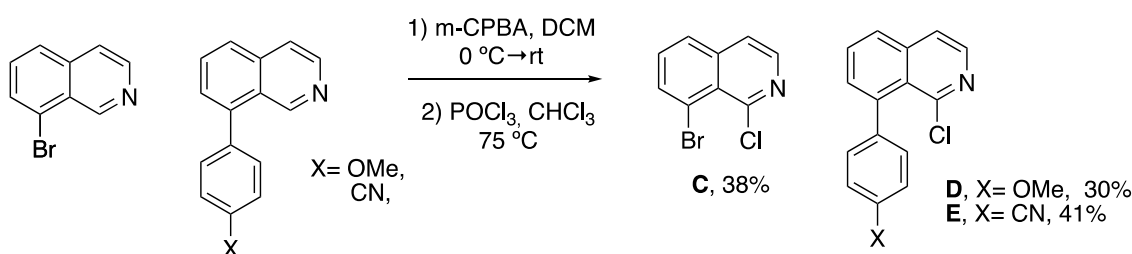

*General procedure for the synthesis of C-E:* Over a round bottom flask containing a solution of **A-B** in CH<sub>2</sub>Cl<sub>2</sub> (11 mL/mmol), *m*-CPBA (77%, 1.6 equiv. ) was slowly added in portions. The reaction was stirred overnight at room temperature, and then, a saturated NaHCO<sub>3</sub> aqueous solution (11mL/mmol) was added reaction and the two phases system was vigorously stirred for 30 min. The organic phase was separated, the aqueous was extracted 2 times with CH<sub>2</sub>Cl<sub>2</sub>. The organics were dried over MgSO<sub>4</sub>, filtered and evaporated to dryness. The reaction crude was used in the chlorination step assuming 100% yield.

Over a solution of the previous *N*-oxidation crude in chloroform (1.5 mL/mmol), POCl<sub>3</sub> (6 equiv.) was added and the reaction was stirred 3h at 75 °C. Then, the reaction was cooled to rt, and it was carefully quenched with H<sub>2</sub>O and saturated NaHCO<sub>3</sub> aqueous solution (CAUTION: vigorous CO<sub>2</sub> loosening was observed). The aqueous phase was extracted with dichloromethane. The combined organic phases were dried over MgSO<sub>4</sub>, filtered and concentrated to dryness. The raw product was purified by column chromatography on silica gel.

### Synthesis of D.

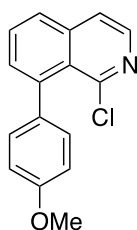

Following the *general procedure* starting from 4.1 mmol of **A**, purification by flash chromatography (Cyclohexane/EtOAc 8:1) afforded **D** as a light brown solid (331 mg, 30%). **<sup>1</sup>H-RMN (400 MHz, CDCl<sub>3</sub>, 298K):** δ 8.28 (d, 1H, *J* = 5.5 Hz), 7.84 (d, 1H, *J* = 8. Hz), 7.70 (t, 1H, *J* = 7.5 Hz), 7.65 (d, 1H, *J* = 5. Hz), 7.53 (d, 1H, *J* = 7.5 Hz), 7.24 (d, 2H, *J* = 8.7 Hz), 6.96 (d, 2H, *J* = 8.7 Hz), 3.89 (s, 3H, OMe). **<sup>13</sup>C-RMN (100 MHz, CDCl<sub>3</sub>, 298K):** δ 159.1, 150.3, 140.9, 140.7, 139.4, 134.4, 132.4, 130.5 (2xC), 129.8, 126.9, 125.2, 121.2, 113.1 (2xC), 55.3 (OMe). **HRMS(ESI)** calculated for C<sub>16</sub>H<sub>13</sub>ONCl (M + H<sup>+</sup>) 270.0680. Found 270.0679.

### Synthesis of E.

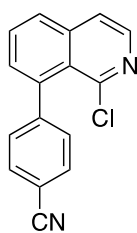

Following the *general procedure* starting from 3.5 mmol of **B**, purification by flash chromatography (Cyclohexane/EtOAc 3:1) afforded **E** as a light yellow solid (379 mg, 41%). **<sup>1</sup>H-RMN (400 MHz, CDCl<sub>3</sub>, 298K):** δ 8.35 (d, 1H, *J* = 5.5 Hz), 7.96 (d, 1H, *J* = 8.3 Hz), 7.79-7.72 (m, 4H), 7.52-7.48 (m, 3H). **<sup>13</sup>C-RMN (100 MHz, CDCl<sub>3</sub>, 298K):** δ 149.6, 147.1, 141.6, 139.4, 138.7, 132.0, 131.5 (2xC), 130.2 (2xC), 129.8, 128.2, 124.6, 121.4, 118.8 (CN), 111.3. **HRMS(ESI)** calculated for C<sub>16</sub>H<sub>10</sub>N<sub>2</sub>Cl (M + H<sup>+</sup>) 265.0529. Found 265.0527.

### Synthesis of C.

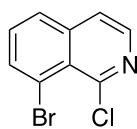

Following the *general procedure* starting from 20 mmol of 8-bromoisoquinoline, purification by flash chromatography (Cyclohexane/EtOAc 8:1) afforded **C** as a light yellow solid (1.84 g, 38%). The spectroscopic data were in agreement with the described in the literature.<sup>3</sup>

<sup>3</sup> Marx, M. A.; Blake, J. F.; Fell, J. B.; Fischer, J. P.; Mejia, M. J. ARRAY BIOPHARMA - WO2020/47192, 2020, A1.

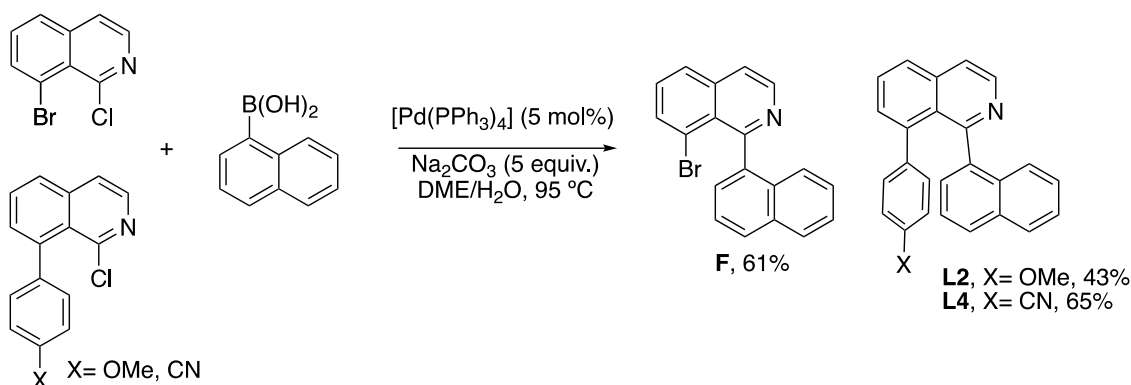

*General procedure for the synthesis of L2-L4:* A Schlenk tube was charged with **D-F** (1 eq), boronic acid (1.1-1.3 equiv.) and  $[\text{Pd}(\text{PPh}_3)_4]$  (5 mol%). After  $\text{N}_2$ /vacuum cycles (3x), deoxygenated DME (3 mL/mmol) and a deoxygenated solution of  $\text{Na}_2\text{CO}_3$  (2-5 equiv.) in water (0.5 mL/mmol) were added, and the reaction was stirred at  $90^\circ\text{C}$  for 5h-overnight. The reaction mixture was then cooled to rt, diluted in water (20 mL) and extracted with DCM (3 x 10 mL). The combined organic phases were dried with  $\text{MgSO}_4$ , filtered and evaporated under reduced pressure. The resulting crude was purified by column chromatography on silica gel.

### Synthesis of L2.

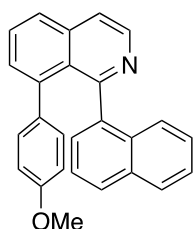

Following the *general procedure* starting from 0.45 mmol of **D**, and using 1.3 equiv. of the corresponding boronic acid, 1.2 mL of DME and 0.45 mL of  $\text{Na}_2\text{CO}_3$  (2M), purification by flash chromatography (Cyclohexane/EtOAc 3:1) afforded **L2** as a light yellow solid (70 mg, 43%).  **$^1\text{H-NMR}$  (400 MHz,  $\text{CDCl}_3$ , 298K):**  $\delta$  8.74 (d, 1H,  $J = 5.6$  Hz), 7.97 (d, 1H,  $J = 8.2$  Hz), 7.85 (d, 1H,  $J = 5.6$  Hz), 7.75 (t, 1H,  $J = 8.2$  Hz), 7.67 (d, 1H,  $J = 8.5$  Hz), 7.54 (dd, 1H,  $J = 6.7$  Hz and  $J = 2.6$  Hz), 7.41-7.35 (m, 3H), 7.30-7.26 (m, 2H), 7.26-7.19 (m, 2H), 6.79 (br d, 1H,  $J = 6.5$  Hz), 6.36 (br d, 1H,  $J = 6.5$  Hz), 6.34 (br d, 1H,  $J = 6.5$  Hz), 5.78 (br d, 1H,  $J = 6.5$  Hz), 3.58 (s, 3H, OMe).  **$^{13}\text{C-NMR}$  (100 MHz,  $\text{CDCl}_3$ , 298K):**  $\delta$  159.6, 157.5, 141.6, 141.4, 139.7, 138.1, 133.5, 133.3, 131.8, 131.3, 130.0, 129.4, 129.3, 128.1, 127.8, 127.8, 126.9, 126.7, 125.7, 125.7, 125.2, 124.9, 120.6, 112.6, 110.6, 55.1 (OMe). **HRMS(ESI)** calculated for  $\text{C}_{26}\text{H}_{20}\text{ON}$  ( $\text{M} + \text{H}^+$ ) 362.1539. Found 362.1537.

### Synthesis of L4.

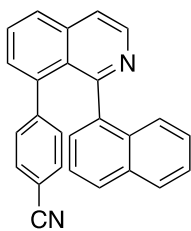

Following the *general procedure* starting from 0.3 mmol of **E**, and using 1.3 equiv. of the corresponding boronic acid, 0.75 mL of DME and 0.3 mL of Na<sub>2</sub>CO<sub>3</sub> (2M), purification by flash chromatography (Cyclohexane/EtOAc 3:1) afforded **L4** as a light yellow solid (70 mg, 65%). **<sup>1</sup>H-RMN (400 MHz, CDCl<sub>3</sub>, 298K):** δ 8.79 (d, 1H, *J* = 5.6 Hz), 8.04 (d, 1H, *J* = 8.0 Hz), 7.87 (d, 1H, *J* = 5.6 Hz), 7.76 (t, 1H, *J* = 8.0 Hz), 7.69 (d, 1H, *J* = 8.0 Hz), 7.59 (d, 1H, *J* = 8.0 Hz), 7.40 (t, 1H, *J* = 7.4 Hz), 7.32-7.02 (m, 5H), 7.04 (d, 1H, *J* = 7.8 Hz), 6.89 (d, 1H, *J* = 8.0 Hz), 6.57 (d, 1H, *J* = 8.0 Hz), 6.53 (d, 1H, *J* = 7.8 Hz). **<sup>13</sup>C-RMN (100 MHz, CDCl<sub>3</sub>, 298K):** δ 158.8, 145.2, 142.1, 139.6, 139.3, 137.9, 133.1, 131.6, 131.2, 129.6, 129.4, 129.3, 129.0, 128.5, 128.3, 128.2 (2xC), 128.1, 126.2, 126.0, 125.7, 125.3, 124.9, 120.8, 118.7 (CN), 109.3. **HRMS(ESI)** calculated for C<sub>26</sub>H<sub>17</sub>N<sub>2</sub><sup>+</sup> (M + H<sup>+</sup>) 357.1386. Found 357.1390.

### Synthesis of F.

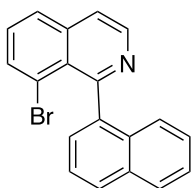

Following the *general procedure* starting from 1.0 mmol of **C**, and using 1.1 equiv. of the corresponding boronic acid, 7 mL of DME and 3.2 mL of Na<sub>2</sub>CO<sub>3</sub> (5M), purification by flash chromatography (Cyclohexane/EtOAc 8:1) afforded **F** as a yellow solid (205 mg, 62%). **<sup>1</sup>H-RMN (400 MHz, CDCl<sub>3</sub>, 298K):** δ 8.71 (d, 1H, *J* = 5.6 Hz), 7.96 (d, 1H, *J* = 8.2 Hz), 7.93 (d, 1H, *J* = 7.7 Hz), 7.92 (d, 1H, *J* = 8.1 Hz), 7.82 (d, 1H, *J* = 7.4 Hz), 7.78 (d, 1H, *J* = 5.6 Hz), 7.56 (t, 1H, *J* = 8.0 Hz), 7.54- 7.45 (m, 2H), 7.42 (d, 1H, *J* = 8.0 Hz), 7.36-7.29 (m, 2H). **<sup>13</sup>C-RMN (100 MHz, CDCl<sub>3</sub>, 298K):** δ 159.3, 142.1, 139.3, 139.0, 134.7, 133.4, 133.2, 130.3, 128.5, 128.1, 127.5, 127.5, 126.9, 126.2, 125.7, 125.6, 125.2, 120.8. **HRMS(ESI)** calculated for C<sub>19</sub>H<sub>13</sub>BrN (M + H<sup>+</sup>) 334.0226 (<sup>79</sup>Br), 336.0205 (<sup>79</sup>Br, <sup>81</sup>Br). Found 334.0227, 336.0202.

### Synthesis of L3.

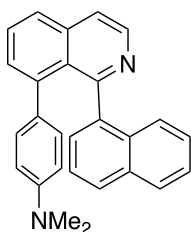

A dried Schlenk tube was charged with **F** (0.3 mmol, 100 mg), 4-Dimethylamino-phenyl boronic acid (0.9 mmol, 149 mg), [Pd(PPh<sub>3</sub>)<sub>4</sub>] (5 mol%, 17.3 mg) and Na<sub>2</sub>CO<sub>3</sub> (0.54 mmol, 57.2 mg). After N<sub>2</sub>/vacuum cycles (3x), deoxygenated 1,4-dioxane (1.4 mL) and deoxygenated water (0.7 mL) were added, and the reaction was



stirred overnight at 85 °C. The reaction mixture was then cooled to rt, diluted in water (20 mL) and extracted with DCM (3 x 10 mL). The combined organic phases were dried with MgSO<sub>4</sub>, filtered and evaporated under reduced pressure. The resulting crude was purified by column chromatography on silica gel (Cyclohexane/EtOAc 5:1) to afford **L3** as a yellow solid (91 mg, 81%). **<sup>1</sup>H-RMN (400 MHz, CDCl<sub>3</sub>, 298K):** δ 8.69 (d, 1H, *J* = 5.5 Hz), 7.91 (d, 1H, *J* = 7.9 Hz), 7.78 (d, 1H, *J* = 5.5 Hz), 7.71 (t, 1H, *J* = 7.9 Hz), 7.63 (d, 1H, *J* = 8.1 Hz), 7.45-7.39 (m, 3H), 7.36 (t, 1H, *J* = 8.1 Hz), 7.29- 7.25 (m, 1H), 7.19-7.12 (m, 2H), 6.75 (br s, 1H), 6.30 (br s, 1H), 6.21 (br s, 1H), 5.58 (br s, 1H), 2.70 (s, 6H, NMe<sub>2</sub>). **<sup>13</sup>C-RMN (100 MHz, CDCl<sub>3</sub>, 298K):** δ 159.9, 148.8, 142.2, 141.5, 140.2, 138.1, 133.5, 131.9, 131.0, 129.9, 129.3 (3xC), 128.1, 127.7, 127.7, 127.1, 126.2, 125.9, 125.6, 125.1, 124.8, 111.6 (br s), 110.6 (br s), 40.6. **HRMS(ESI)** calculated for C<sub>27</sub>H<sub>23</sub>N<sub>2</sub><sup>+</sup> (M + H<sup>+</sup>) 375.1856. Found 375.1858.

### 3. Synthesis of Pt-complexes 1-6 and 5(acac)-6(acac).

#### Procedure A. Synthesis of Pt-PPh<sub>3</sub> complexes 1-7:

A dried Schlenk tube was charged with the substrates **L1-L7** (0.1 mmol), [Pt(DMSO)<sub>2</sub>Cl<sub>2</sub>] (0.12 mmol, 51.2 mg) and Na<sub>2</sub>CO<sub>3</sub> (0.2 mmol, 21.2 mg). After cycles of vacuum-N<sub>2</sub>, anhydrous and deoxygenated toluene (4 mL) was added and the resulting reaction mixture was stirred at 110°C for 16 h. Then, reaction was cooled to rt, filtered through a pad of celite, washed with CH<sub>2</sub>Cl<sub>2</sub> and concentrated to dryness in the rotavap. Reaction crude was analyzed by NMR to corroborate the total consumption of the starting **L1-L7**, and used in the next step without purification. This reaction crude was placed in a Schlenk tube, and after cycles of vacuum-Ar, deoxygenated DCM (3 mL) was added. Then, a solution of PPh<sub>3</sub> (1.1 equiv.) in DCM (1.5 mL) was dropwise added at rt and the resulting solution was heated at 40°C overnight. Then, the reaction crude was concentrated in the rotavapor and purified by column chromatography (Cyclohexane/EtOAc mixtures) to give the corresponding complex **L1-L7**.

#### Procedure B. Synthesis of Pt-acac complexes 5(acac)-9(acac):

The cycloplatination step was similar to the procedure A, and then, the resulting reaction crude was dissolved in 6 mL of anhydrous EtOH/acetone 2:1 mixture, and was transferred via cannula (N<sub>2</sub> current) to a Schlenk tube containing sodium acac (0.5 mmol, 70 mg). The reaction mixture was stirred overnight at rt, diluted with CH<sub>2</sub>Cl<sub>2</sub> (20 mL), washed with water (10 mL), and the organic phase dried over MgSO<sub>4</sub> and purified by column chromatography (Cyclohexane/EtOAc mixtures).

#### Synthesis of **1**.

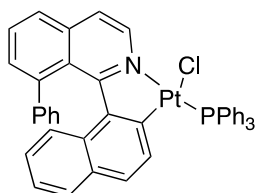

Following the procedure A, purification by column chromatography (Cyclohexane/EtOAc 2:1), to afford **1** as a orange solid (75 mg, 95%). **<sup>1</sup>H-RMN (400 MHz, CDCl<sub>3</sub>, 298K):** δ 9.79 (dd, 1H, *J*<sub>H,H</sub> = 5.8 Hz, *J*<sub>P,H</sub> = 3.5 Hz), 7.95-7.91 (m, 7H), 7.86 (t, 1H, *J* = 8.2 Hz), 7.76 (d, 1H, *J* = 5.8 Hz), 7.55 (d, 1H, *J* = 7.0 Hz), 7.52-7.41 (m, 10H), 7.18 (d, 1H, *J* = 8.5 Hz), 7.08 (t, 1H, *J* = 7.2 Hz) 6.99-6.92 (m, 2H), 6.87 (d, 2H, *J* = 7.4 Hz), 6.74-6.64 (m, 5H). **<sup>13</sup>C-RMN (100 MHz, CDCl<sub>3</sub>, 298K):** δ 168.8 (d, *J*<sub>P,C</sub> = 2 Hz), 144.6, 142.4, 140.6 (d, *J*<sub>P,C</sub> = 6 Hz), 140.0, 139.7, 139.1, 135.4 (d, *J*<sub>P,C</sub> = 11 Hz, 6 x Co-

PPh<sub>3</sub>), 134.5 (d,  $J_{P,C} = 7$  Hz), 134.5, 131.4, 131.3, 131.3, 130.8, 130.8 (d,  $J_{P,C} = 4$  Hz, 3 x *Cp*-PPh<sub>3</sub>), 130.2, 128.5 (d,  $J_{P,C} = 2$  Hz), 127.9 (d,  $J_{P,C} = 11$  Hz, 6 x *Cm*-PPh<sub>3</sub>), 127.6, 126.1, 125.7, 125.2, 123.5 (d,  $J = 2$  Hz), 123.3, 123.2, 118.4 (d,  $J_{P,C} = 3$  Hz). **<sup>31</sup>P NMR (162 MHz, CDCl<sub>3</sub>, 298K):**  $\delta$  23.6 (s+d,  $J_{Pt,P} = 4441$ Hz). **HRMS(ESI)** calculated for C<sub>43</sub>H<sub>31</sub>NPPt (M + H<sup>+</sup>) 787.1836. Found 787.1831.

### Synthesis of 2.

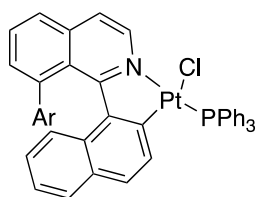

Ar = *p*-MeO-Ph

Following the *procedure A*, purification by column chromatography (Cyclohexane/EtOAc 3:1), to afford **2** as an orange solid (73 mg, 89 %). **<sup>1</sup>H-RMN (400 MHz, CDCl<sub>3</sub>, 298K):**  $\delta$  9.77 (dd, 1H,  $J_{H,H} = 6.2$  Hz,  $J_{P,H} = 3.5$  Hz), 7.96-7.88 (m, 7H), 7.84 (t, 1H,  $J_{H,H} = 7.5$  Hz), 7.75 (d, 1H,  $J_{H,H} = 6.2$  Hz), 7.54-7.41 (m, 10H), 7.22 (d, 1H,  $J_{H,H} = 8.1$  Hz), 7.08 (m, 1H), 6.93 (br s, 2H), 6.76 (d, 2H,  $J_{H,H} = 7.9$  Hz), 6.73-6.69 (m, 2H), 6.15 (d, 2H,  $J_{H,H} = 7.9$  Hz), 3.54 (s, 3H, OMe). **<sup>13</sup>C-RMN (100 MHz, CDCl<sub>3</sub>, 298K):**  $\delta$  168.9 (d,  $J_{P,C} = 2$  Hz), 157.8, 144.7, 142.0, 140.3 (d,  $J_{P,C} = 6$  Hz), 139.8, 139.1, 135.4 (d,  $J_{P,C} = 11$  Hz, 6 x *Co*-PPh<sub>3</sub>), 134.5 (d,  $J_{P,C} = 7$  Hz), 132.3, 131.4, 131.3, 131.1 (d,  $J_{P,C} = 47$  Hz, *Cipso*-PPh<sub>3</sub>), 130.8 (s, 3 x *Cp*-PPh<sub>3</sub>), 130.2, 128.3, 127.9 (d,  $J_{P,C} = 11$  Hz, 6 x *Cm*-PPh<sub>3</sub>), 127.6, 125.2 (d,  $J_{P,C} = 4$  Hz), 123.7 (d,  $J_{P,C} = 2$  Hz), 123.4, 123.1, 118.4 (d,  $J_{P,C} = 3$  Hz), 111.4 (br s), 55.1. **<sup>31</sup>P-RMN (162 MHz, CDCl<sub>3</sub>, 298K):**  $\delta$  23.5 (s+d,  $J_{Pt,P} = 4454$  Hz). **HRMS(ESI)** calculated for C<sub>44</sub>H<sub>33</sub>ONPPt (M + H<sup>+</sup>) 817.1942. Found 817.1936.

### Synthesis of 3.

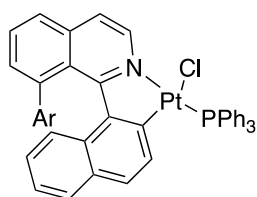

Ar = *p*-NMe<sub>2</sub>-Ph

Following the *procedure A*, purification by column chromatography (Cyclohexane/EtOAc 4:1), to afford **3** as an orange-red solid (83 mg, 96 %). **<sup>1</sup>H-RMN (400 MHz, CDCl<sub>3</sub>, 298K):**  $\delta$  9.71 (dd, 1H,  $J_{H,H} = 6.0$  Hz,  $J_{P,H} = 3.4$  Hz), 7.92 (dd, 6H,  $J_{P,H} = 11.4$ Hz,  $J_{H,H} = 7.8$  Hz), 7.82-7.78 (m, 2H), 7.70 (d, 1H,  $J = 6.0$  Hz), 7.52 (dd, 1H,  $J = 6.0$  and 1.8 Hz), 7.46-7.40 (m, 9H), 7.15 (d, 1H,  $J = 8.0$ Hz), 7.04 (t, 1H,  $J = 7.8$  Hz), 6.92-6.86 (m, 2H), 6.71-6.62 (m, 4H), 5.93 (d, 2H,  $J = 7.0$  Hz), 2.65 (s, 6H, NMe<sub>2</sub>). **<sup>13</sup>C-RMN (100 MHz, CDCl<sub>3</sub>, 298K):**  $\delta$  169.1, 148.9, 145.0, 142.7, 139.8 (d,  $J_{P,C} = 6$  Hz), 139.6, 139.1, 135.4 (d,  $J_{P,C} = 11$  Hz, 6 x *Co*-PPh<sub>3</sub>), 134.5 (d,  $J_{P,C} = 7$  Hz), 131.4, 131.1 (d,  $J_{P,C} = 22$  Hz, 3 x *Cipso*-PPh<sub>3</sub>), 130.7 (s, 3 x *Cp*-PPh<sub>3</sub>), 130.3 (d,  $J_{P,C} = 10$

Hz), 129.6, 129.1 (br s), 128.4, 128.3, 127.8 (d,  $J_{P,C} = 11$  Hz, 6 x *Cm*-PPh<sub>3</sub>), 127.6, 125.0, 124.4, 123.9, 123.3, 123.2, 118.4, 110.7, 40.6. **<sup>31</sup>P NMR (162 MHz, CDCl<sub>3</sub>, 298K):** δ 23.6 (s+d,  $J_{Pt,P} = 4471$  Hz). **HRMS(ESI)** calculated for C<sub>45</sub>H<sub>37</sub>ClN<sub>2</sub>PPt (M + H<sup>+</sup>) 866.2025. Found 866.2004.

#### Synthesis of 4.

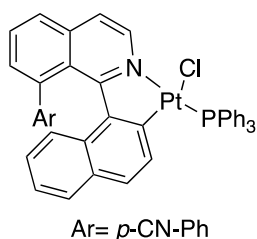

Following the *procedure A*, purification by column chromatography (Cyclohexane/EtOAc 3:1), to afford **4** as an orange solid (75 mg, 84 %). **<sup>1</sup>H-RMN (400 MHz, CDCl<sub>3</sub>, 298K):** δ 9.83 (dd, 1H,  $J_{H,H} = 6.0$  Hz and  $J_{P,H} = 3.5$  Hz), 8.00 (d, 1H,  $J = 8.3$  Hz), 7.91-7.86 (m, 7H), 7.80 (d, 1H,  $J = 6.0$  Hz), 7.54-7.50 (m, 4H), 7.46-7.42 (m, 6H), 7.23 (d, 1H,  $J = 8.4$  Hz), 7.10 (t, 1H,  $J = 7.4$  Hz), 6.95 (t, 1H, 8.0 Hz), 6.90-6.82 (br s, 4H), 6.74 (s, 2H). **<sup>13</sup>C-RMN (100 MHz, CDCl<sub>3</sub>, 298K):** δ 168.5, 144.1, 141.7 (d,  $J_{P,C} = 6$  Hz), 140.8, 140.4, 139.4, 135.7 (d,  $J_{P,C} = 11$  Hz, 6 x *Co*-PPh<sub>3</sub>), 135.0 (d,  $J_{P,C} = 7$ Hz), 131.6, 131.4, 131.4 (s, 3 x *Cp*-PPh<sub>3</sub>), 131.2, 130.5 (d,  $J_{P,C} = 62$  Hz, 3 x *C*<sup>ipso</sup>-PPh<sub>3</sub>), 130.4, 129.1, 128.3 (d,  $J_{P,C} = 10$ Hz, 6 x *Cm*-PPh<sub>3</sub>), 127.4, 125.9, 123.9, 123.2, 123.1 (d,  $J_{P,H} = 2$  Hz), 119.0, 109.5 (CN). **<sup>31</sup>P NMR (162 MHz, CDCl<sub>3</sub>, 298K):** δ 22.9 (s+d,  $J_{Pt,P} = 4435$  Hz). **HRMS(ESI)** calculated for C<sub>45</sub>H<sub>37</sub>ClN<sub>2</sub>PPt (M + H<sup>+</sup>) 866.2025. Found 866.2004.

#### Synthesis of 5.

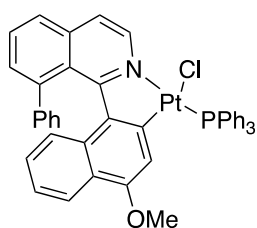

Following the *procedure A*, purification by column chromatography (Cyclohexane/EtOAc 2:1), to afford **5** as a red solid (53 mg, 62 %). **<sup>1</sup>H NMR (400 MHz, CDCl<sub>3</sub>, 298K):** δ (ppm) 9.65 (dd,  $J = 6.1, 3.5$  Hz, 1H), 7.93 (s, 1H), 7.92 – 7.89 (m, 3H), 7.89 – 7.86 (m, 2H), 7.85 (s, 1H), 7.83 – 7.77 (m, 1H), 7.64 – 7.61 (m, 1H), 7.55 (d,  $J = 8.4$  Hz, 1H), 7.49 (s, 1H), 7.48 (s, 1H), 7.47 – 7.45 (m, 2H), 7.45 – 7.43 (m, 2H), 7.41 (d,  $J = 1.9$  Hz, 3H), 7.40 (d,  $J = 2.0$  Hz, 1H), 7.05 (ddd,  $J = 8.2, 6.3, 1.6$  Hz, 1H), 6.98 – 6.88 (m, 2H), 6.83 (d,  $J = 7.1$  Hz, 2H), 6.75 – 6.68 (m, 1H), 6.64 (t,  $J = 7.3$  Hz, 2H), 6.12 (d,  $J = 3.0$  Hz, 1H), 2.86 (s, 3H). **<sup>13</sup>C NMR (101 MHz, CDCl<sub>3</sub>, 298K):** δ (ppm) 142.5, 139.8, 139.7, 139.3, 137.3, 135.6, 135.5, 135.0, 134.7, 134.6, 132.2, 131.3, 131.0, 130.8, 130.4, 130.3, 128.1, 128.0, 126.0, 125.9, 125.6, 123.0, 122.9, 122.2, 121.7, 117.2, 117.1, 114.7, 114.6, 54.8. **<sup>31</sup>P NMR (162 MHz, CDCl<sub>3</sub>,**

**298K**):  $\delta$  (ppm) 38.15, 24.49, 10.84. **HRMS(ESI)** calculated for  $C_{44}H_{33}ClNOPt$  ( $M + H^+$ ) 853.17089. Found 853.1715.

#### Synthesis of **6**.

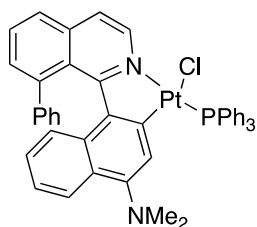

Following the *procedure A*, purification by column chromatography (Tol/EtOAc 5:1), to afford **6** as a red-purple solid (48 mg, 56 %).  **$^1H$  NMR (400 MHz,  $CDCl_3$ , 298K)**:  $\delta$  (ppm) 9.67 (dd,  $J = 6.1, 3.5$  Hz, 1H), 7.95 – 7.90 (m, 3H), 7.90 – 7.86 (m, 3H), 7.85 (s, 1H), 7.82 – 7.76 (m, 1H), 7.63 – 7.60 (m, 1H), 7.50 – 7.44 (m, 5H), 7.43 – 7.41 (m, 2H), 7.41 – 7.39 (m, 2H), 7.39 (d,  $J = 2.2$  Hz, 1H), 7.17 (d,  $J = 8.3$  Hz, 1H), 7.06 – 7.01 (m, 1H), 6.98 (d,  $J = 9.1$  Hz, 1H), 6.91 – 6.85 (m, 1H), 6.81 (d,  $J = 1.8$  Hz, 2H), 6.68 – 6.59 (m, 3H), 6.18 (d,  $J = 3.1$  Hz, 1H), 2.03 (s, 6H).  **$^{13}C$ -RMN (100 MHz,  $CDCl_3$ , 298K)**:  $\delta$  157.1, 140.0, 135.8, 135.7, 135.0, 134.9, 131.3, 131.1, 131.0, 130.6, 130.6, 128.7, 128.6, 128.2, 128.1, 128.0, 126.4, 125.8, 125.3, 124.9, 124.4, 123.8, 122.9, 117.2, 43.8.  **$^{31}P$  NMR (162 MHz,  $CDCl_3$ , 298K)**:  $\delta$  (ppm) 24.91. **HRMS(ESI)** calculated for  $C_{45}H_{36}ClN_2PPt$  ( $M + H^+$ ) 866.20253. Found 866.2023.

#### Synthesis of **5-acac**.

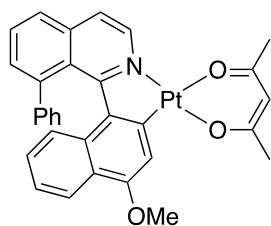

Following the *procedure B*, purification by column chromatography (Cyclohexane/EtOAc 10:1), to afford **5-acac** as a pink solid (62 mg, 95 %).  **$^1H$ -RMN (400 MHz,  $CDCl_3$ , 298K)**:  $\delta$  8.78 (d, 1H,  $J = 6.2$  Hz,  $^{195}Pt$  satellites signals with  $^3J_{Pt,H} = 38$  Hz), 7.79-7.72 (m, 3H), 7.48 (dd, 1H,  $J = 6.8$  and 1.6 Hz), 7.41 (d, 1H,  $J = 6.2$  Hz), 7.24 (d, 1H,  $J = 8.3$  Hz), 7.11 (s, 1H,  $^{195}Pt$  satellites signals with  $^3J_{Pt,H} = 42$  Hz), 7.07 (ddd, 1H,  $J = 8.2, 6.8$  and 1.2 Hz), 6.96 (ddd, 1H,  $J = 8.4, 6.8$  and 1.4 Hz), 6.84 (br s, 2H), 6.73-6.65 (m, 3H), 5.53 (s, 1H), 4.03 (s, 3H), 2.06 (s, 3H), 2.05 (s, 3H).  **$^{13}C$ -RMN (100 MHz,  $CDCl_3$ , 298K)**:  $\delta$  186.1, 183.9, 171.1, 156.0, 144.3, 142.3, 139.9, 138.9, 138.1, 135.3, 132.4, 130.7, 130.3, 128.8, 126.3, 125.9, 125.7, 125.1, 123.4, 122.4, 122.4, 122.2, 122.1, 116.5, 105.6, 102.7, 55.4, 28.3, 27.3. **HRMS(ESI)** calculated for  $C_{31}H_{26}NO_3Pt$  ( $M + H^+$ ) 655.1555. Found 655.1550.

#### Synthesis of **6-acac**.

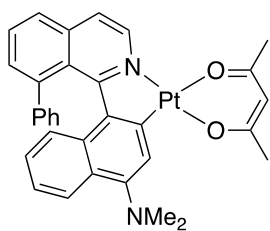

Following the *procedure B*, purification by column chromatography (Cyclohexane/EtOAc 10:1), to afford **6-acac** as a purple solid (40 mg, 60 %). **<sup>1</sup>H-RMN (400 MHz, CDCl<sub>3</sub>, 298K)**: δ 8.78 (d, 1H, *J* = 6.2 Hz, <sup>195</sup>Pt satellites signals with <sup>3</sup>*J*<sub>Pt,H</sub> = 38 Hz), 7.77 (dd, 1H, *J* = 8.2 and 1.4 Hz), 7.77 (dd, 1H, *J* = 8.2 and 6.9 Hz), 7.63 (dd, 1H, *J* = 8.2 and 1.3 Hz), 7.47 (dd, 1H, *J* = 6.9 and 1.5 Hz), 7.38 (d, 1H, *J* = 6.2 Hz), 7.22 (d, 1H, *J* = 8.4 Hz), 7.09 (s, 1H), 7.03 (ddd, 1H, *J* = 8.2, 6.8 and 1.2 Hz), 6.89 (ddd, 1H, *J* = 8.4, 6.8 and 1.3 Hz), 6.65 (br s, 5H), 5.50 (s, 1H), 2.89 (s, 6H), 2.05 (s, 3H), 2.03 (s, 3H). **<sup>13</sup>C-RMN (100 MHz, CDCl<sub>3</sub>, 298K)**: δ 186.0, 183.9, 170.7, 151.6, 142.1, 140.2, 138.8, 138.3, 136.3, 133.0, 130.6, 130.3, 128.7, 126.2, 125.6, 125.1, 125.0 (2xC), 122.9, 122.2, 121.8, 116.1, 112.5, 102.6, 43.8, 28.3, 27.2. One CH and Cq are missing, perhaps are overlapped with other signals. **HRMS(ESI)** calculated for C<sub>32</sub>H<sub>29</sub>N<sub>2</sub>O<sub>2</sub>Pt (M + H<sup>+</sup>) 668.1871. Found 668.1858.

## 4. NMR spectra.

$^1\text{H-NMR}$  (400MHz,  $\text{CDCl}_3$ , 298K):

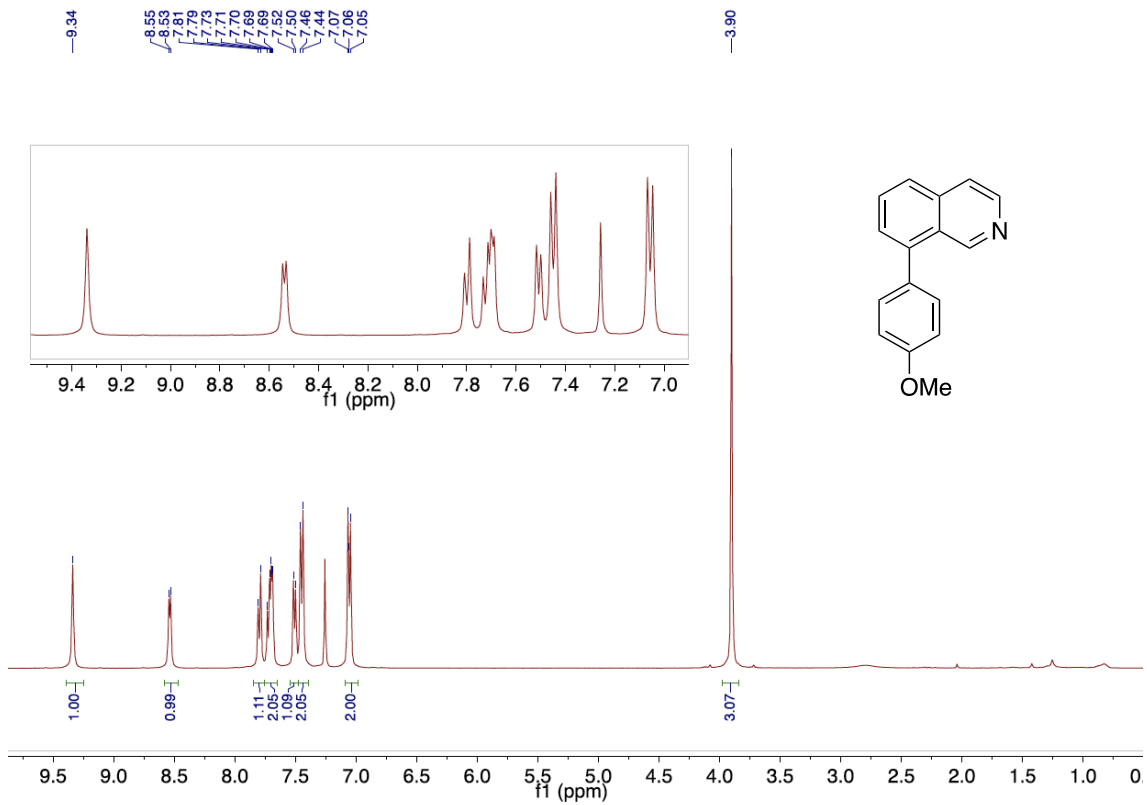

$^{13}\text{C-NMR}$  (100MHz,  $\text{CDCl}_3$ , 298K):

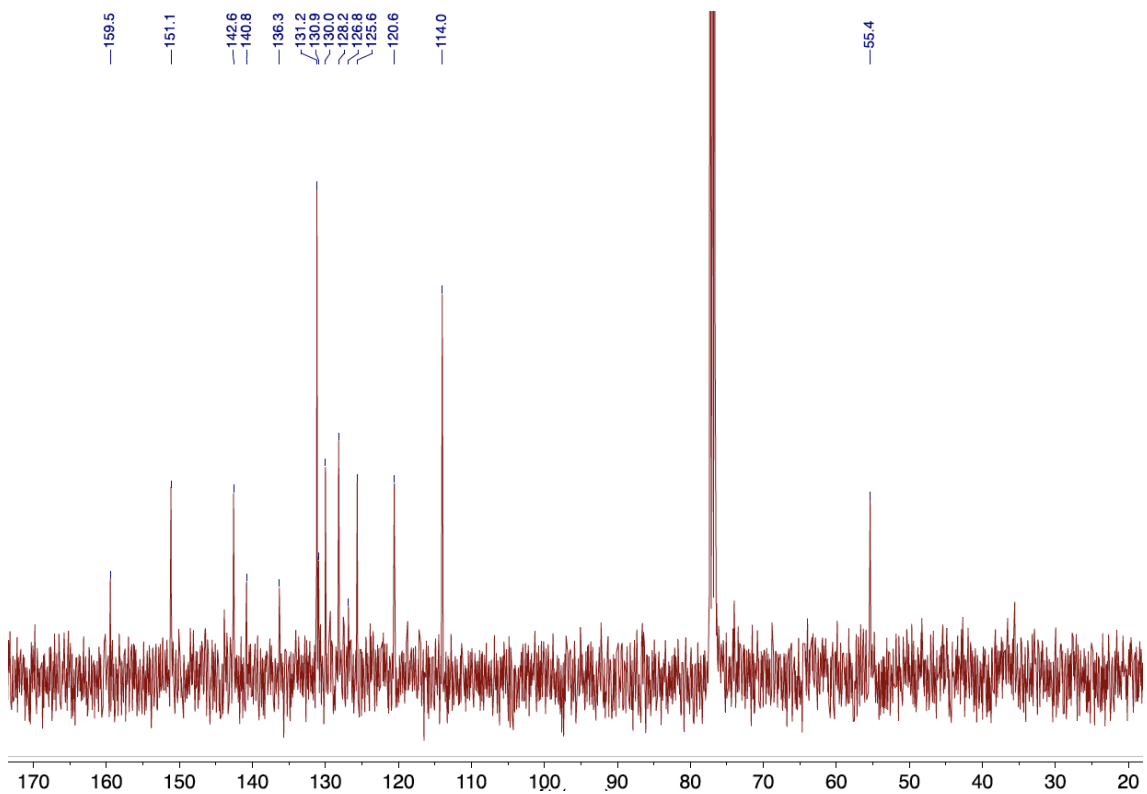

<sup>1</sup>H-NMR (400MHz, CDCl<sub>3</sub>, 298K):

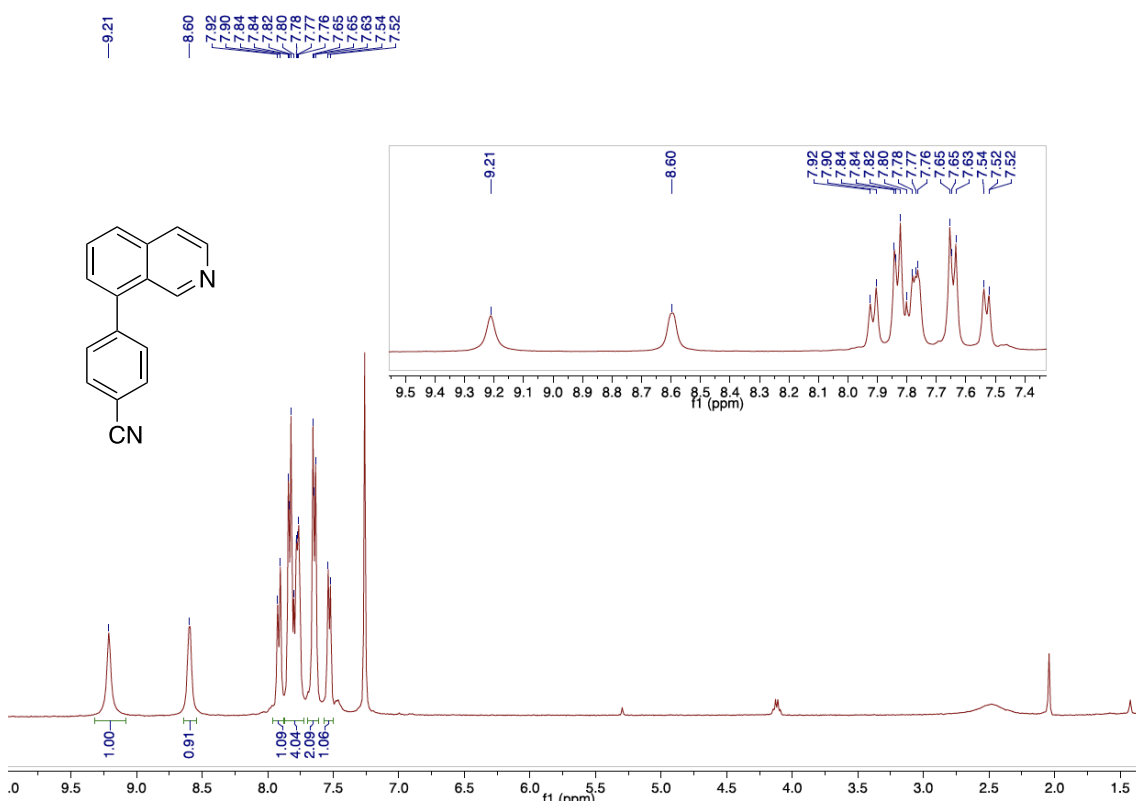

<sup>13</sup>C-NMR (100MHz, CDCl<sub>3</sub>, 298K):

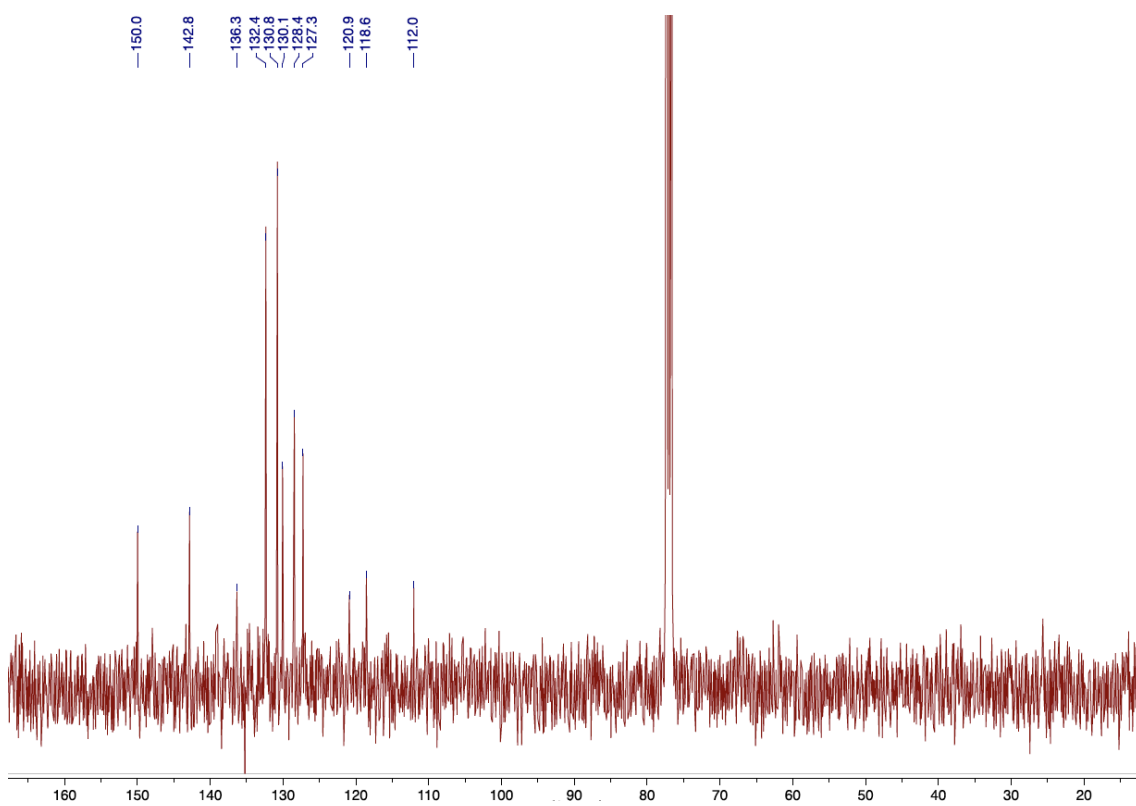



$^1\text{H-NMR}$  (400MHz,  $\text{CDCl}_3$ , 298K):

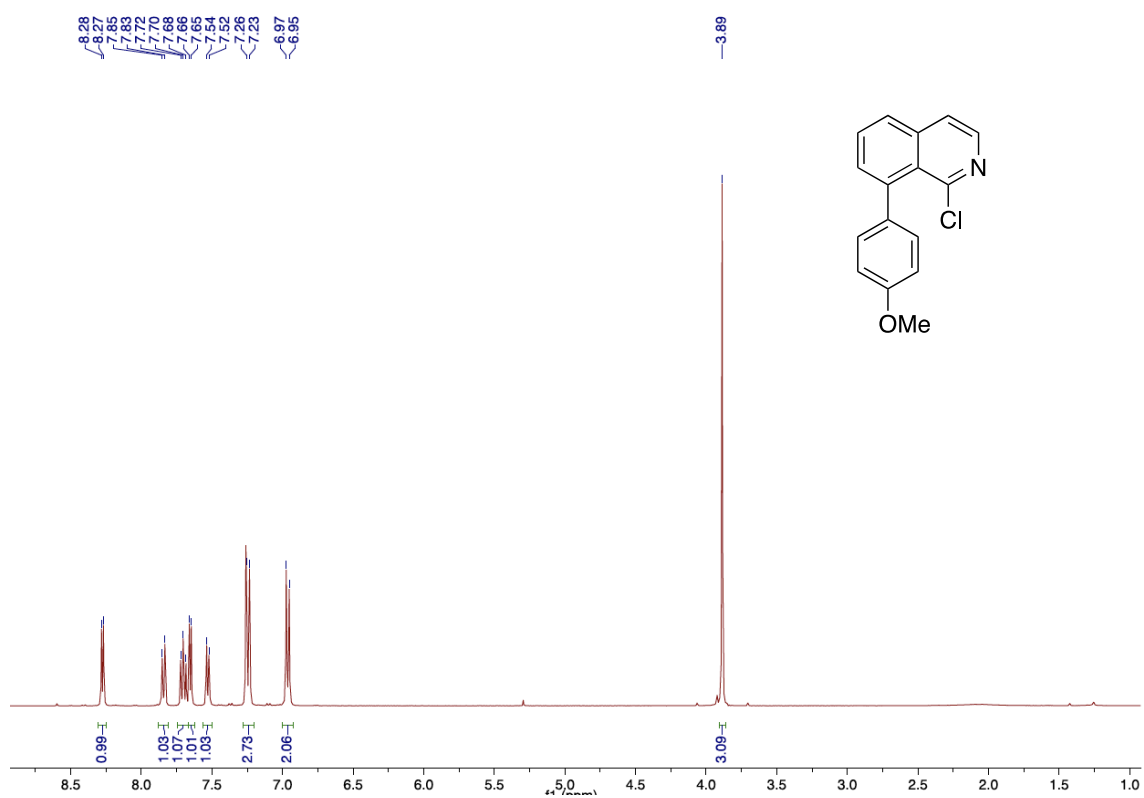

$^{13}\text{C-NMR}$  (100MHz,  $\text{CDCl}_3$ , 298K):

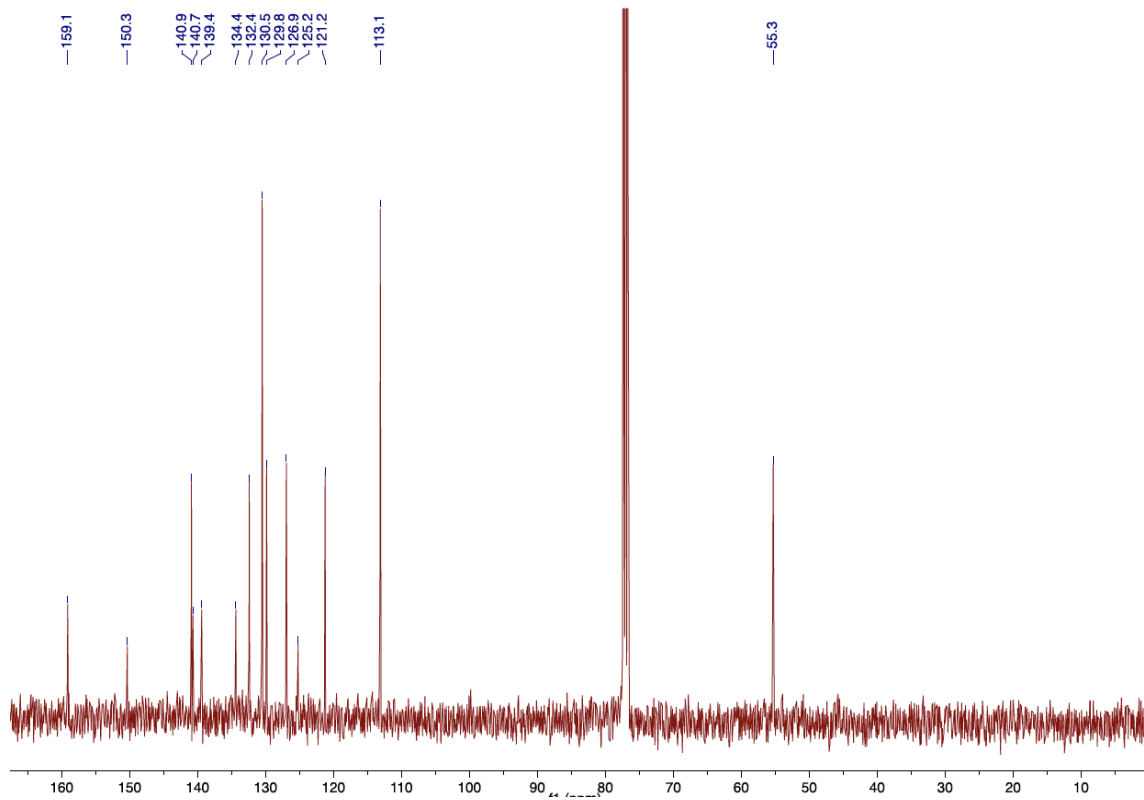

$^1\text{H-NMR}$  (400MHz,  $\text{CDCl}_3$ , 298K):

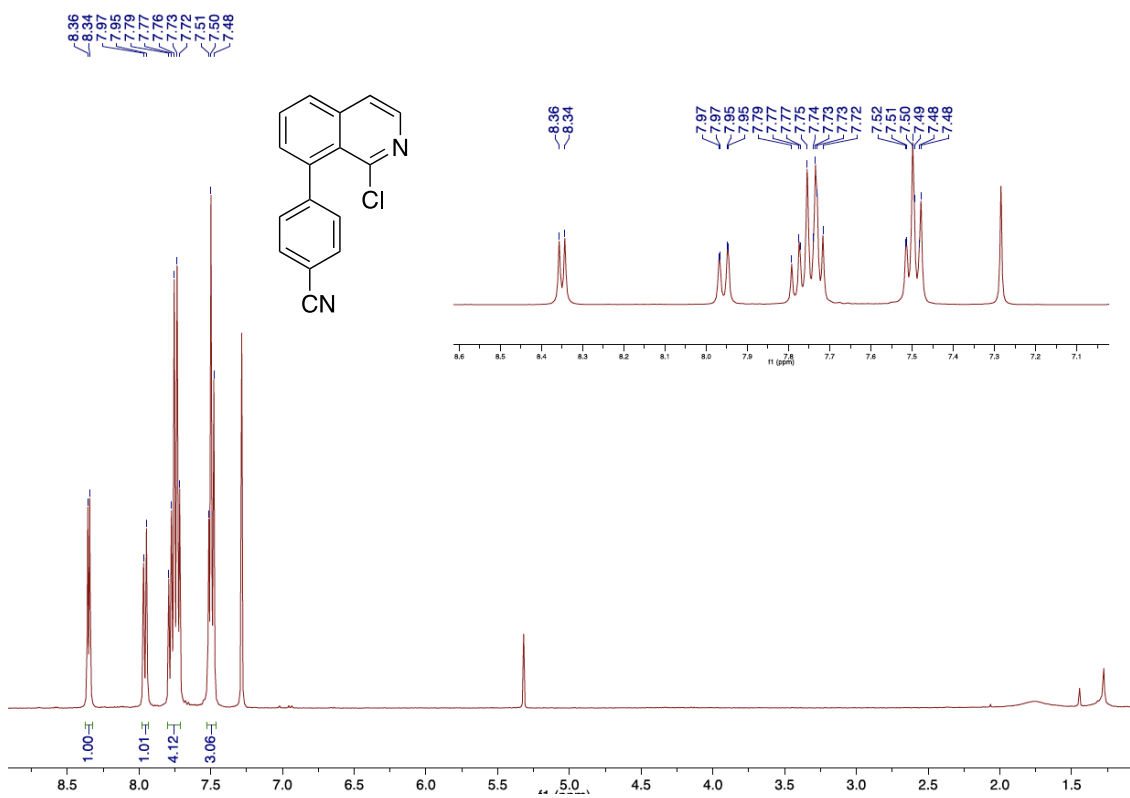

$^{13}\text{C-NMR}$  (100MHz,  $\text{CDCl}_3$ , 298K):

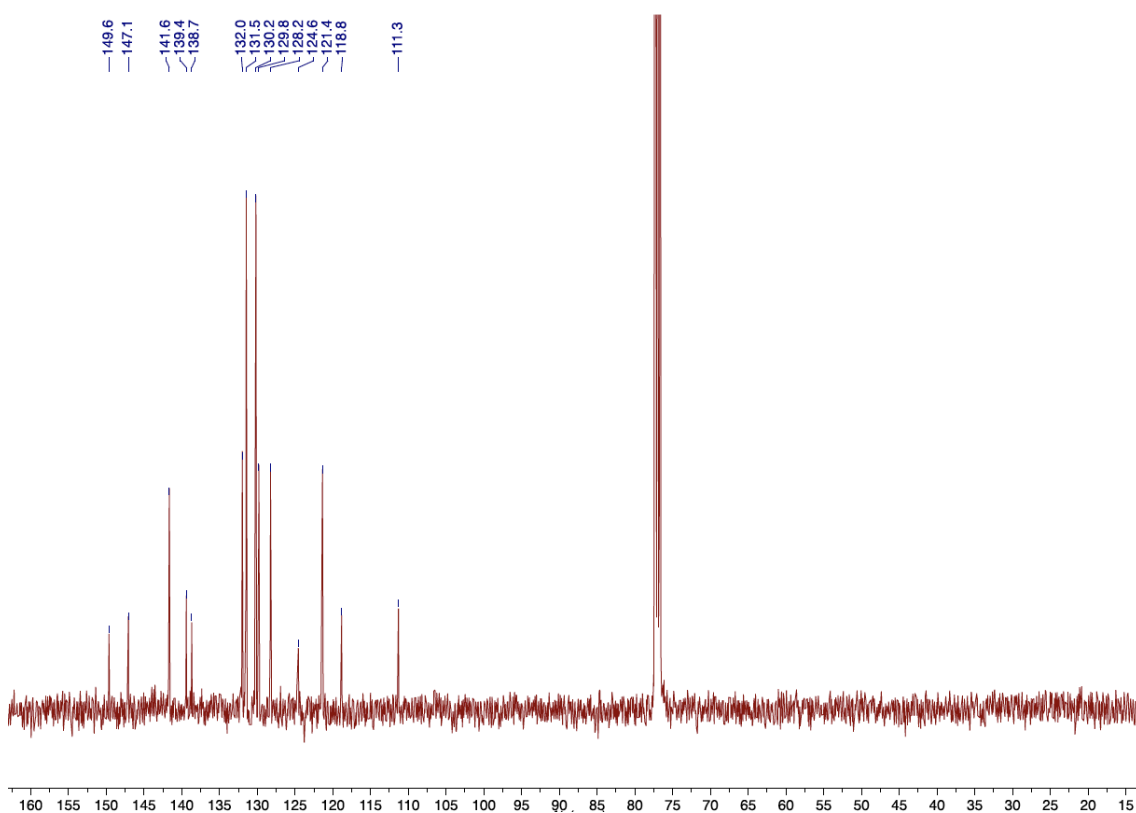

$^1\text{H-NMR}$  (400MHz,  $\text{CDCl}_3$ , 298K):

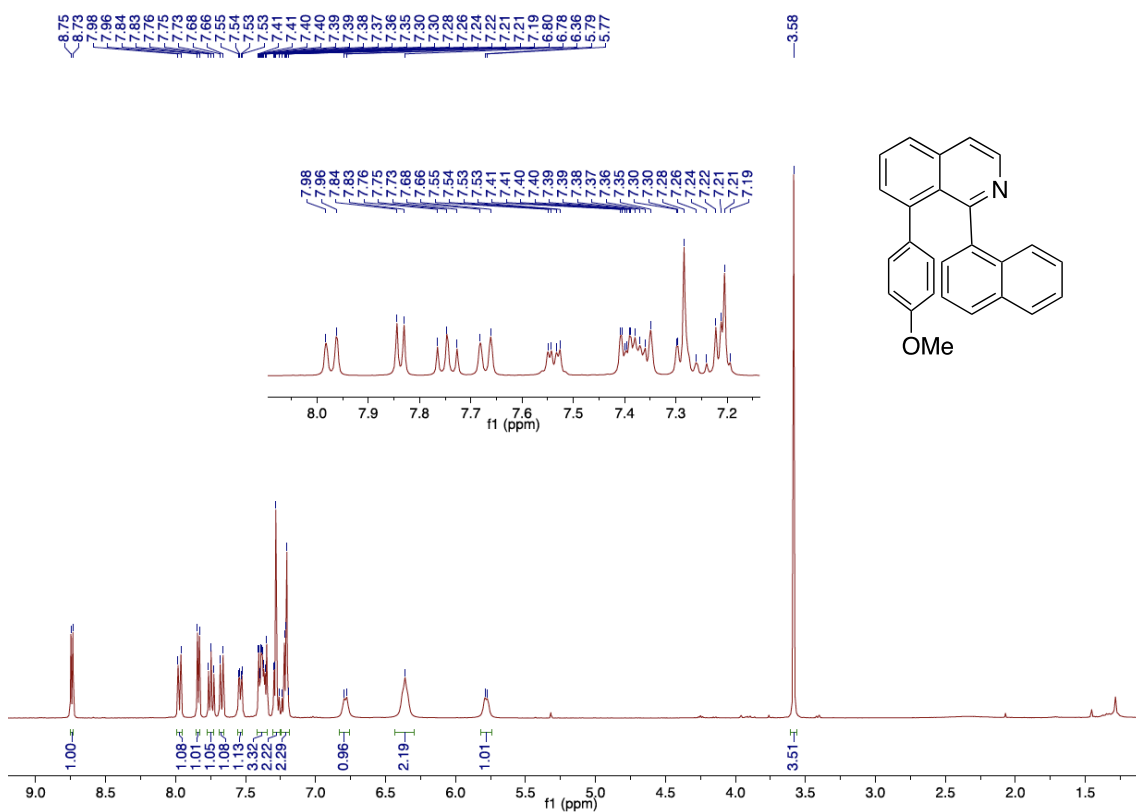

$^{13}\text{C-NMR}$  (100MHz,  $\text{CDCl}_3$ , 298K):

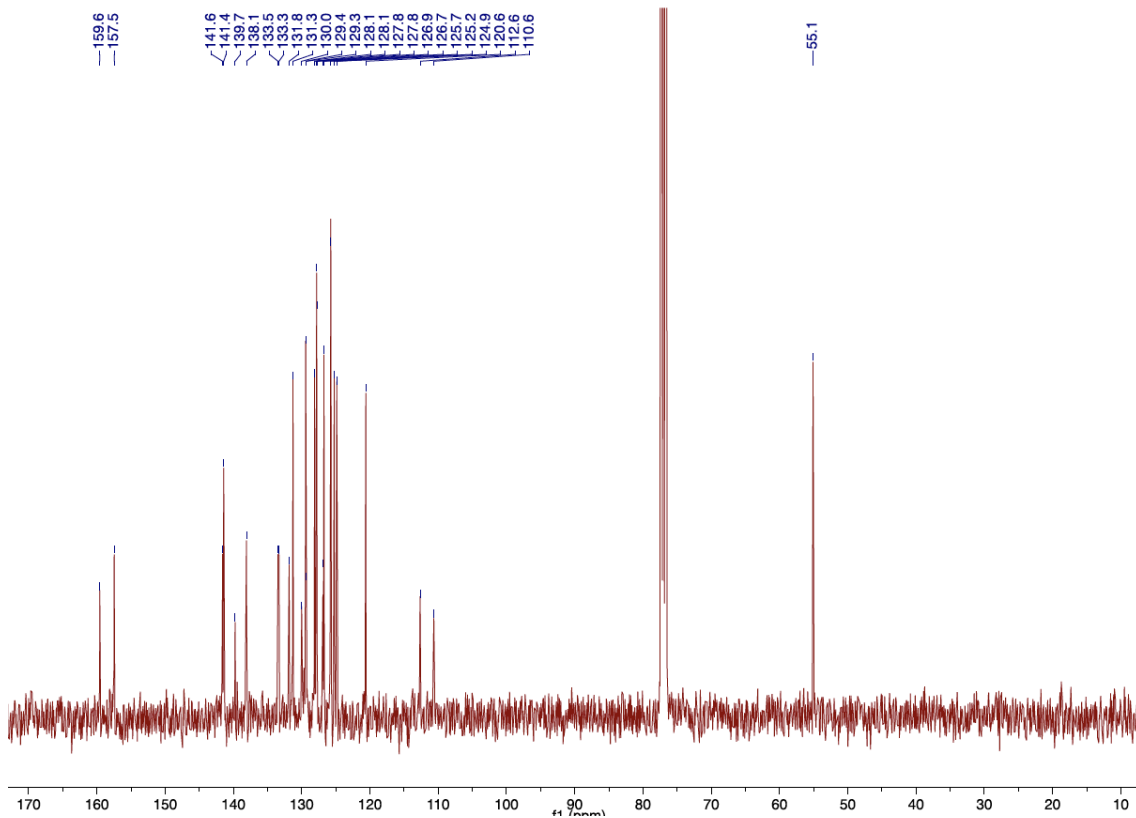

<sup>1</sup>H-NMR (400MHz, CDCl<sub>3</sub>, 298K):

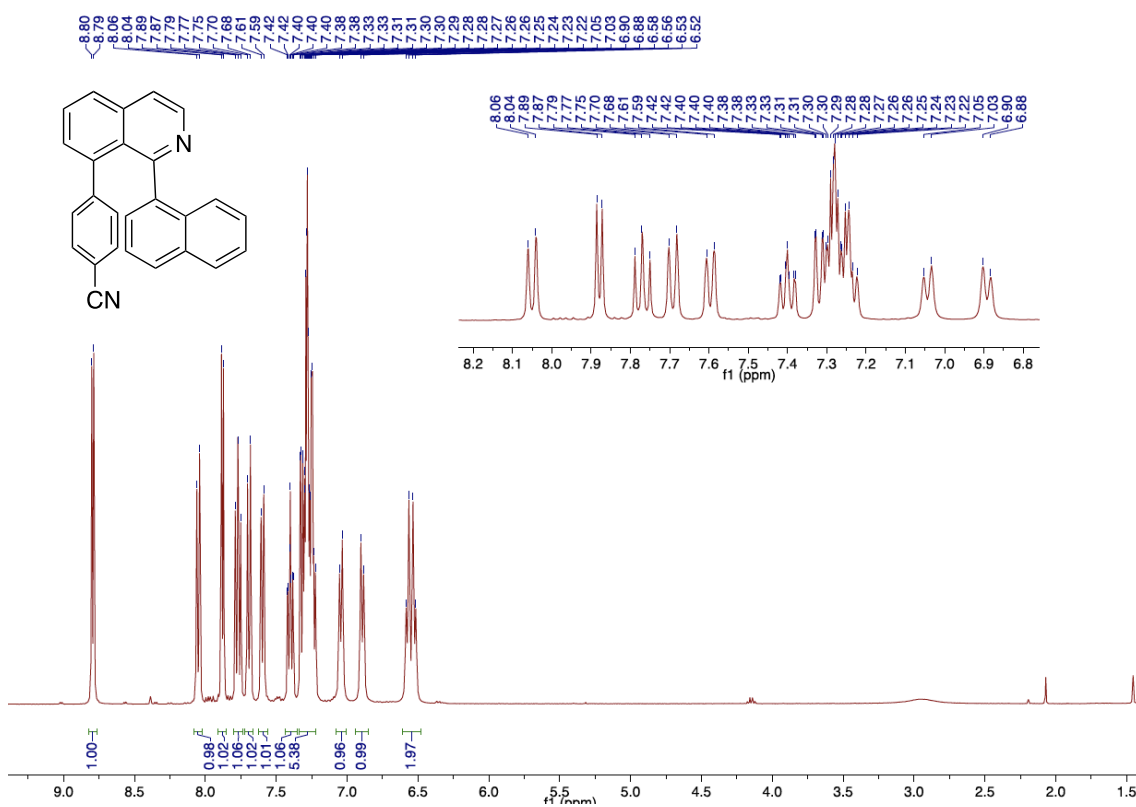

<sup>13</sup>C-NMR (100MHz, CDCl<sub>3</sub>, 298K):

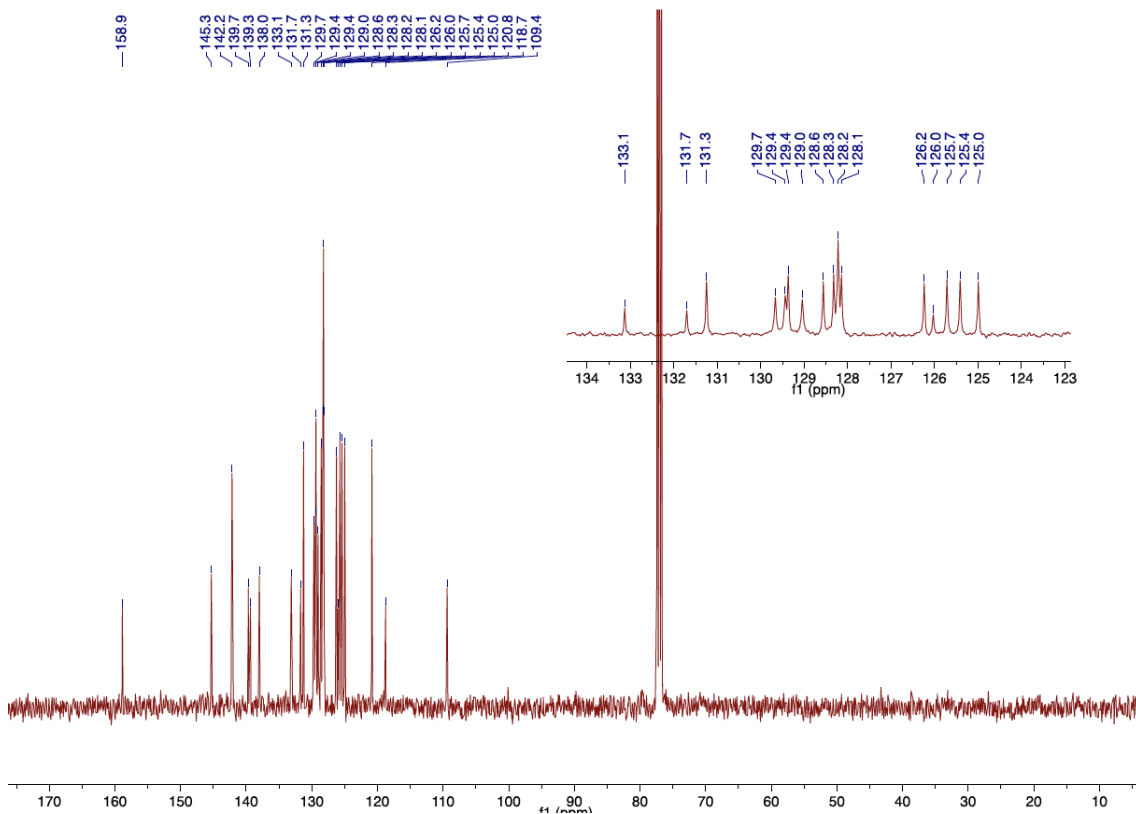

$^1\text{H-NMR}$  (400MHz,  $\text{CDCl}_3$ , 298K):

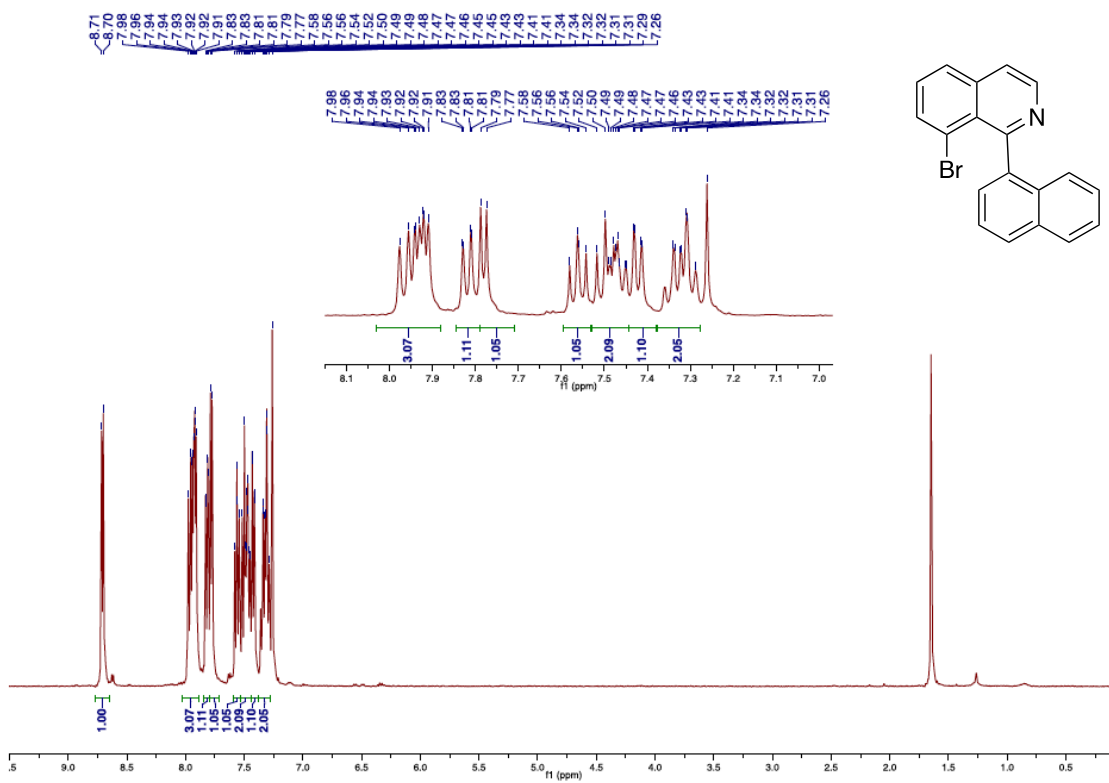

$^{13}\text{C-NMR}$  (100MHz,  $\text{CDCl}_3$ , 298K):

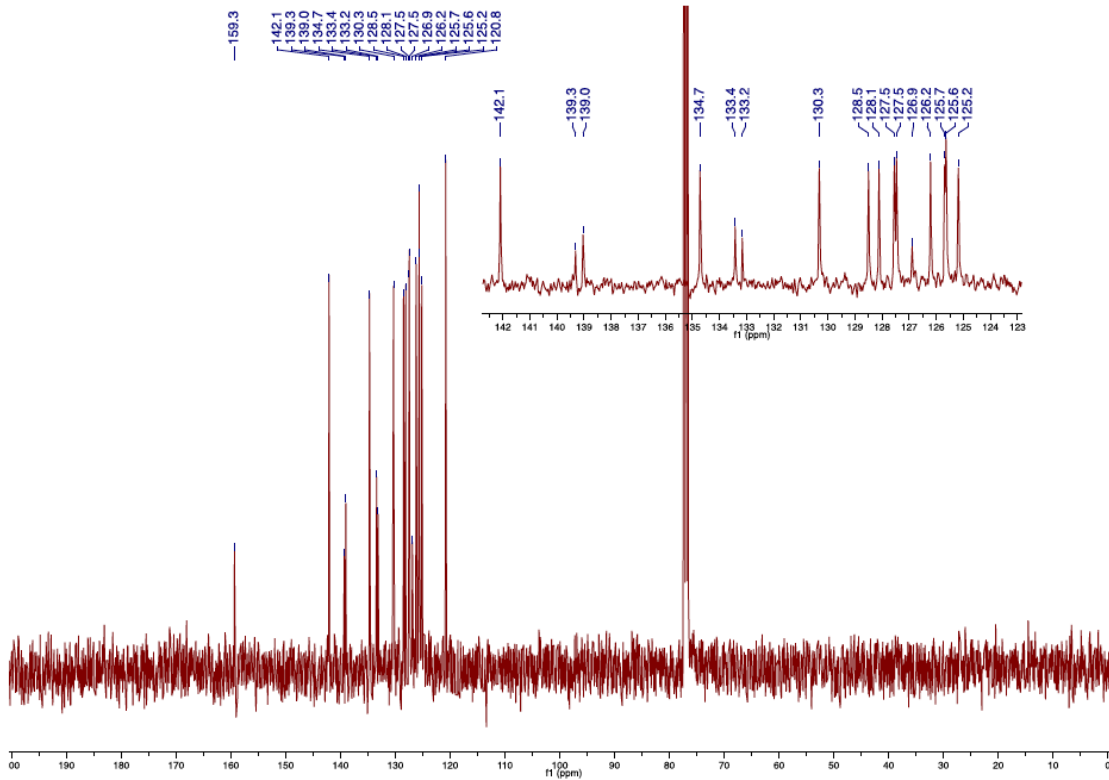

<sup>1</sup>H-NMR (400MHz, CDCl<sub>3</sub>, 298K):

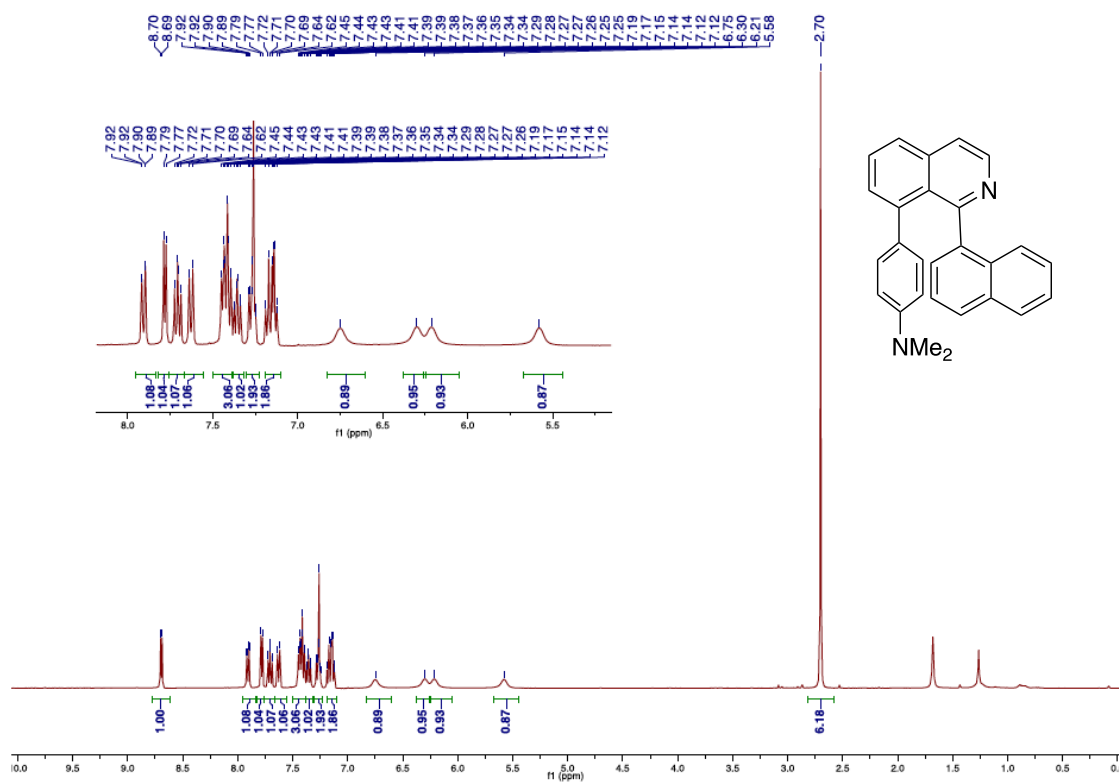

<sup>13</sup>C-NMR (100MHz, CDCl<sub>3</sub>, 298K):

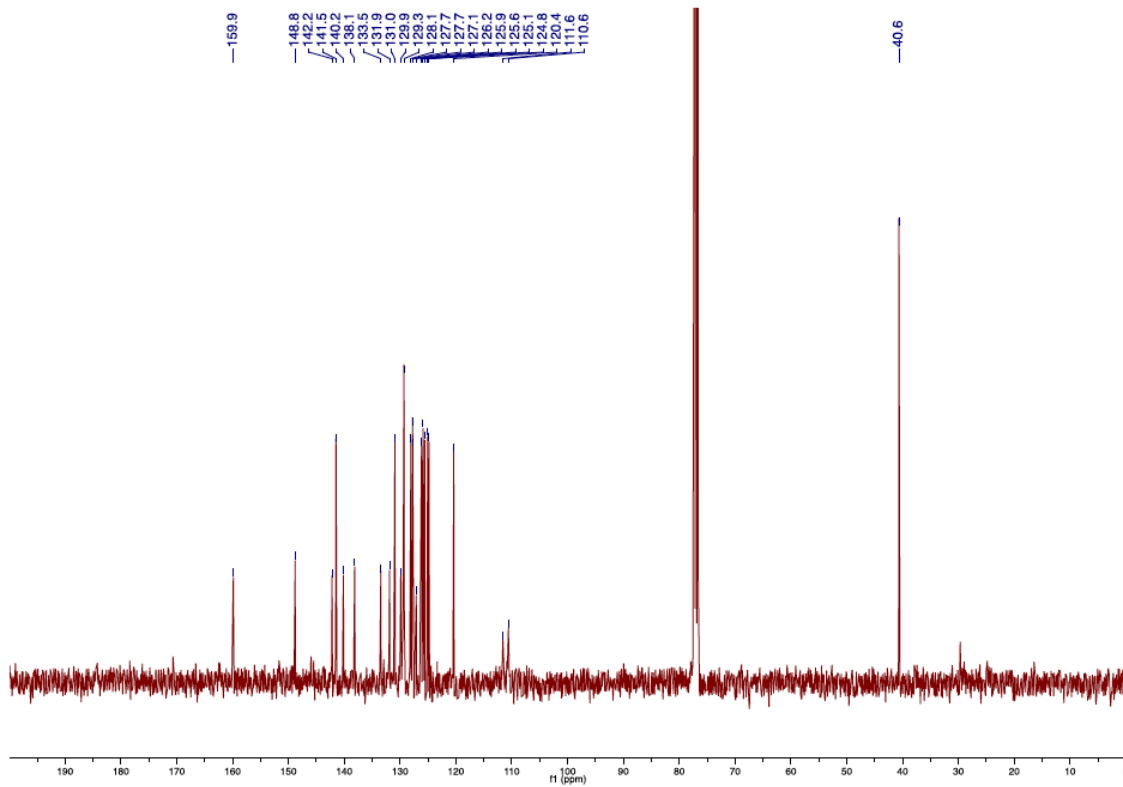

$^1\text{H-NMR}$  (400MHz,  $\text{CDCl}_3$ , 298K):

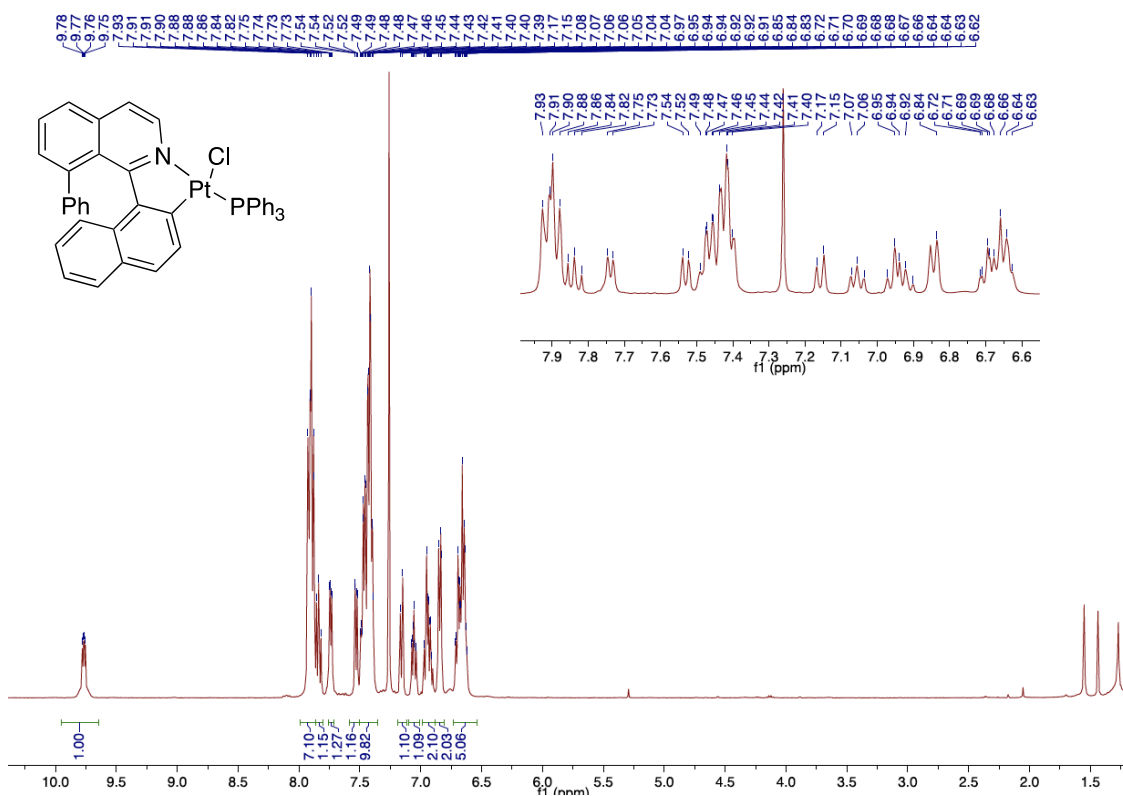

$^{13}\text{C-NMR}$  (100MHz,  $\text{CDCl}_3$ , 298K):

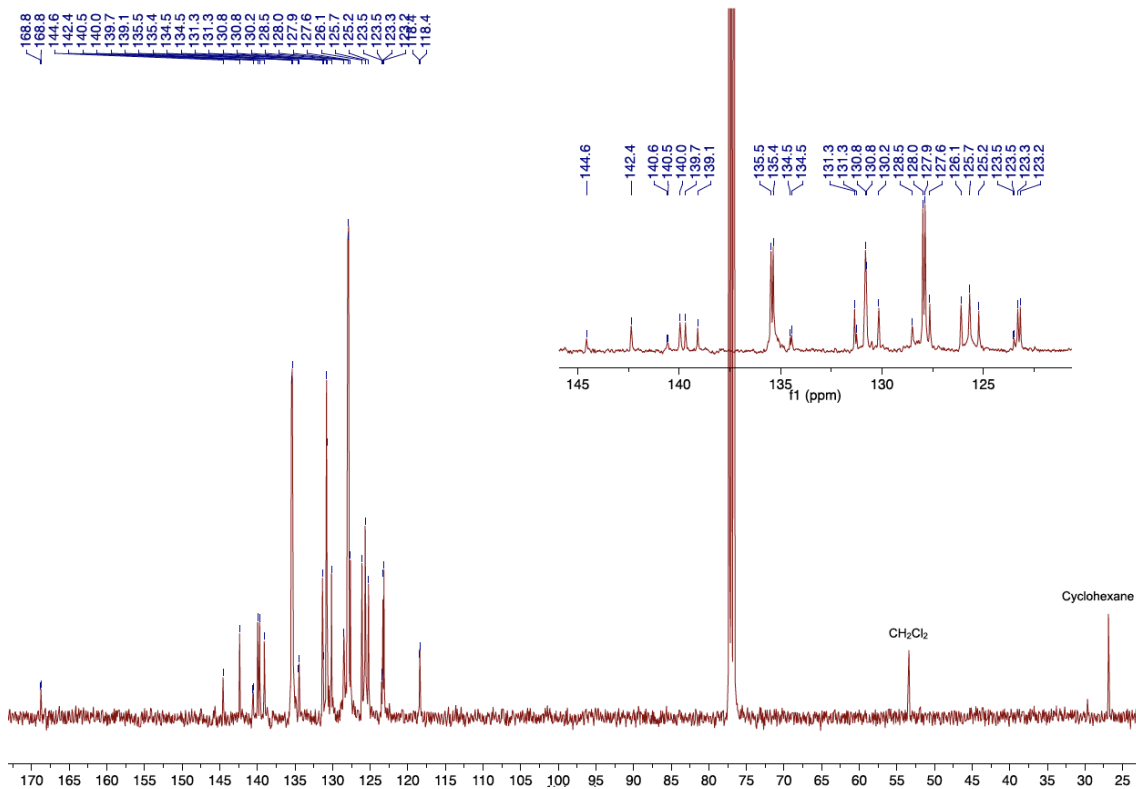

$^{31}\text{P}$ -NMR (162MHz,  $\text{CDCl}_3$ , 298K):

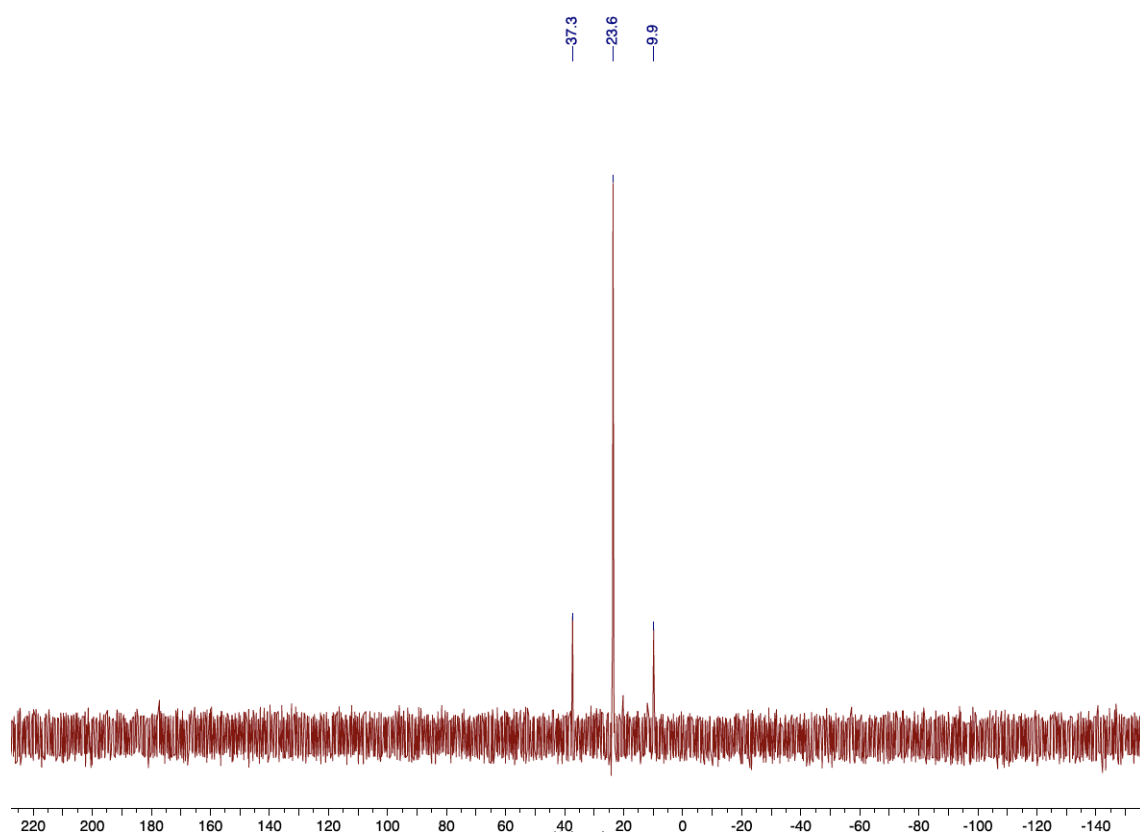



<sup>1</sup>H-NMR (400MHz, CDCl<sub>3</sub>, 298K):

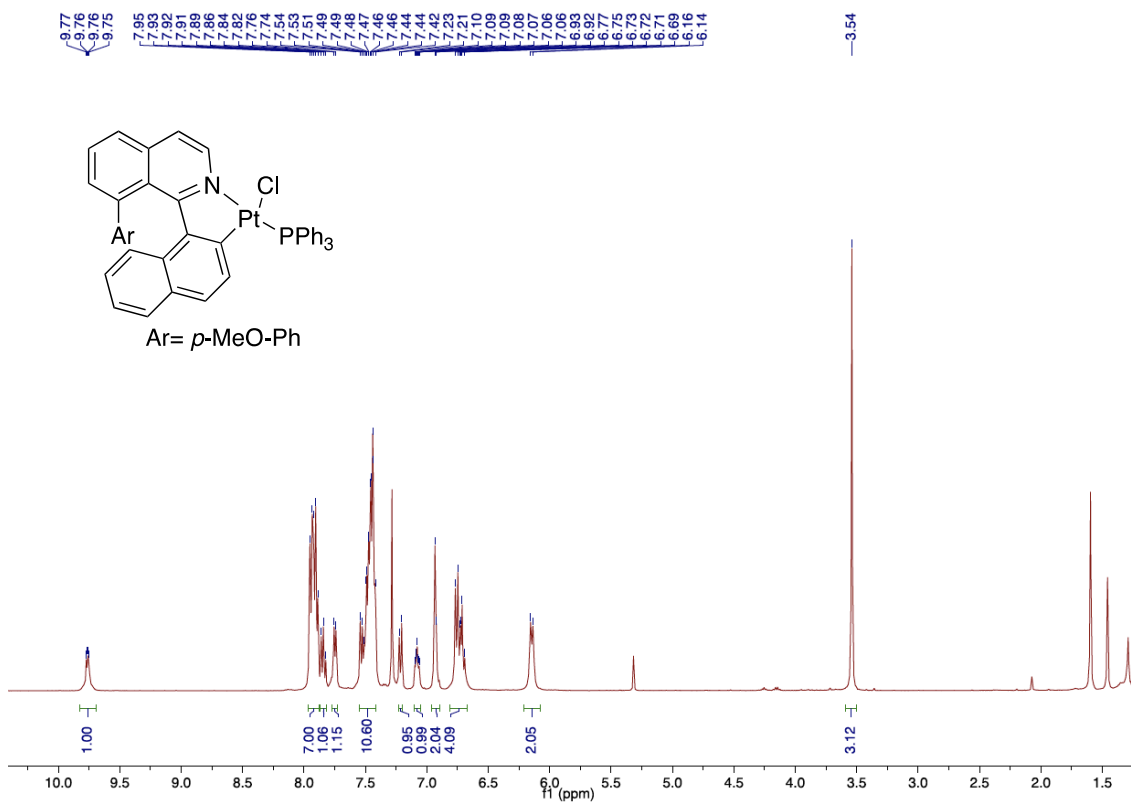

<sup>13</sup>C-NMR (100MHz, CDCl<sub>3</sub>, 298K):

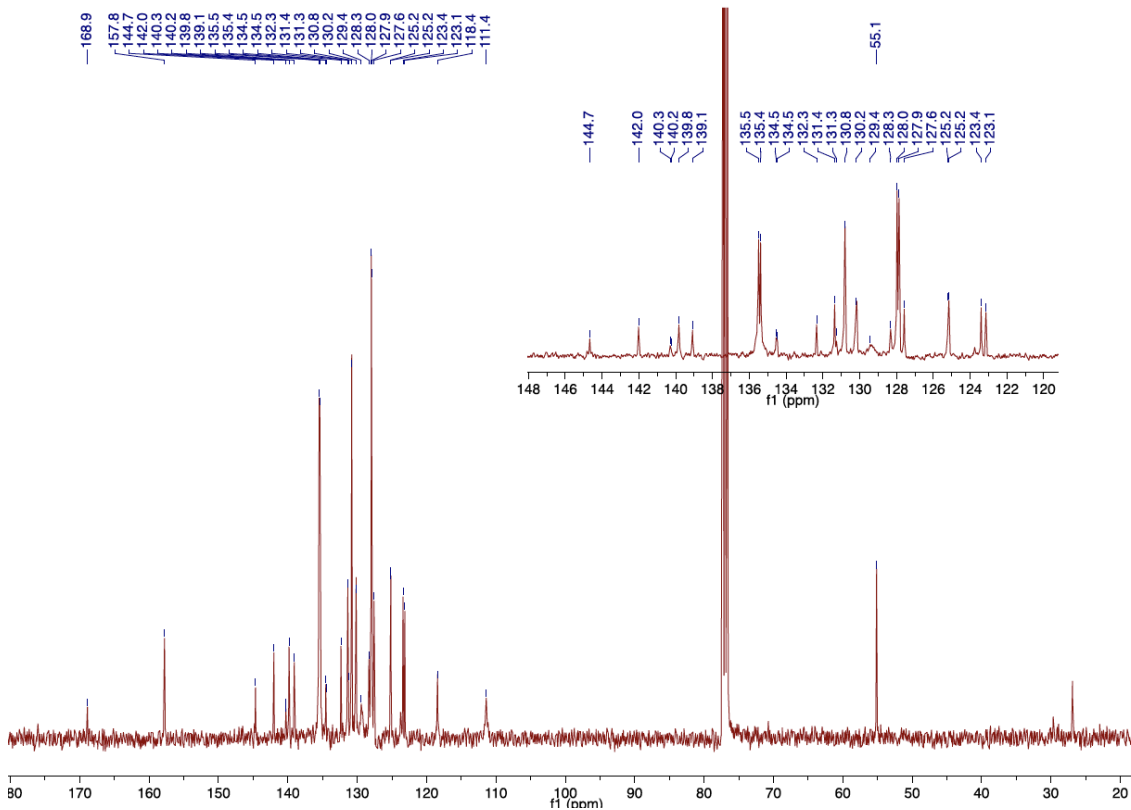

$^{31}\text{P}$ -NMR (162MHz,  $\text{CDCl}_3$ , 298K):

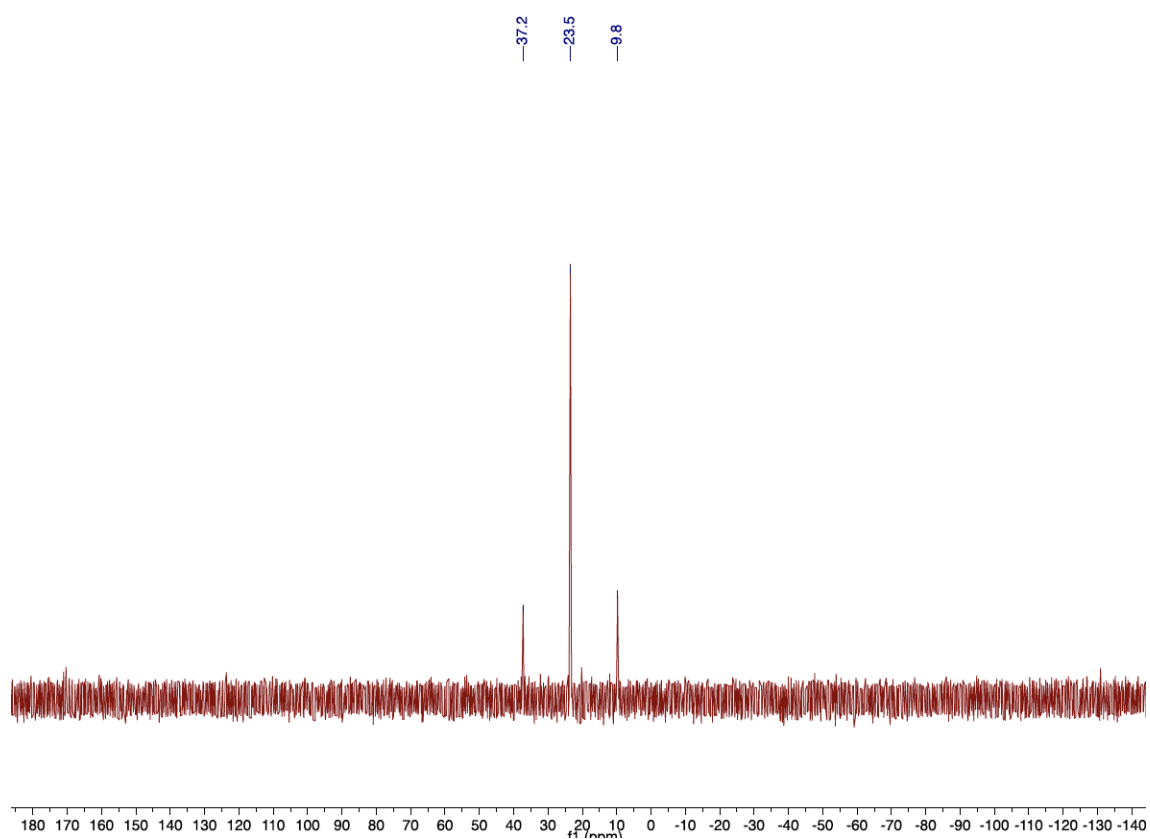

$^1\text{H-NMR}$  (400MHz,  $\text{CDCl}_3$ , 298K):

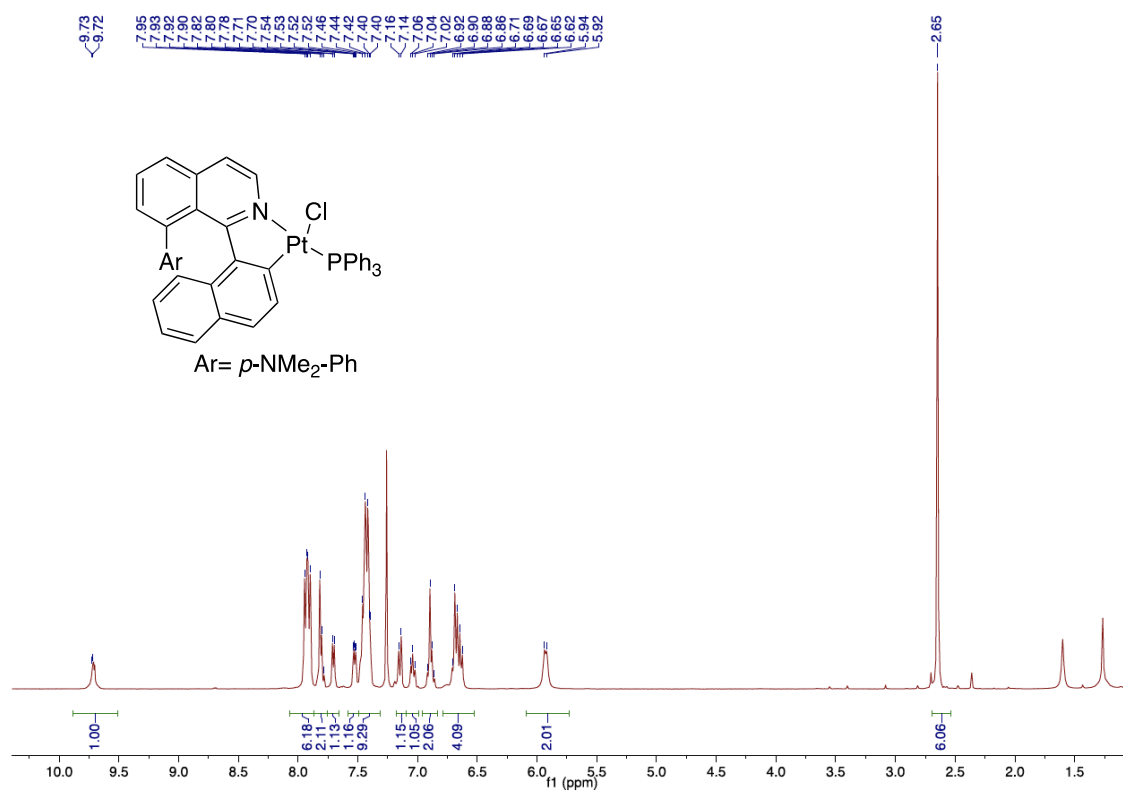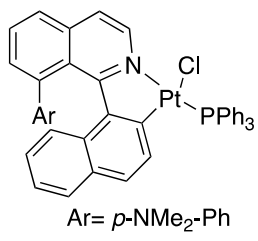

$^{13}\text{C-NMR}$  (100MHz,  $\text{CDCl}_3$ , 298K):

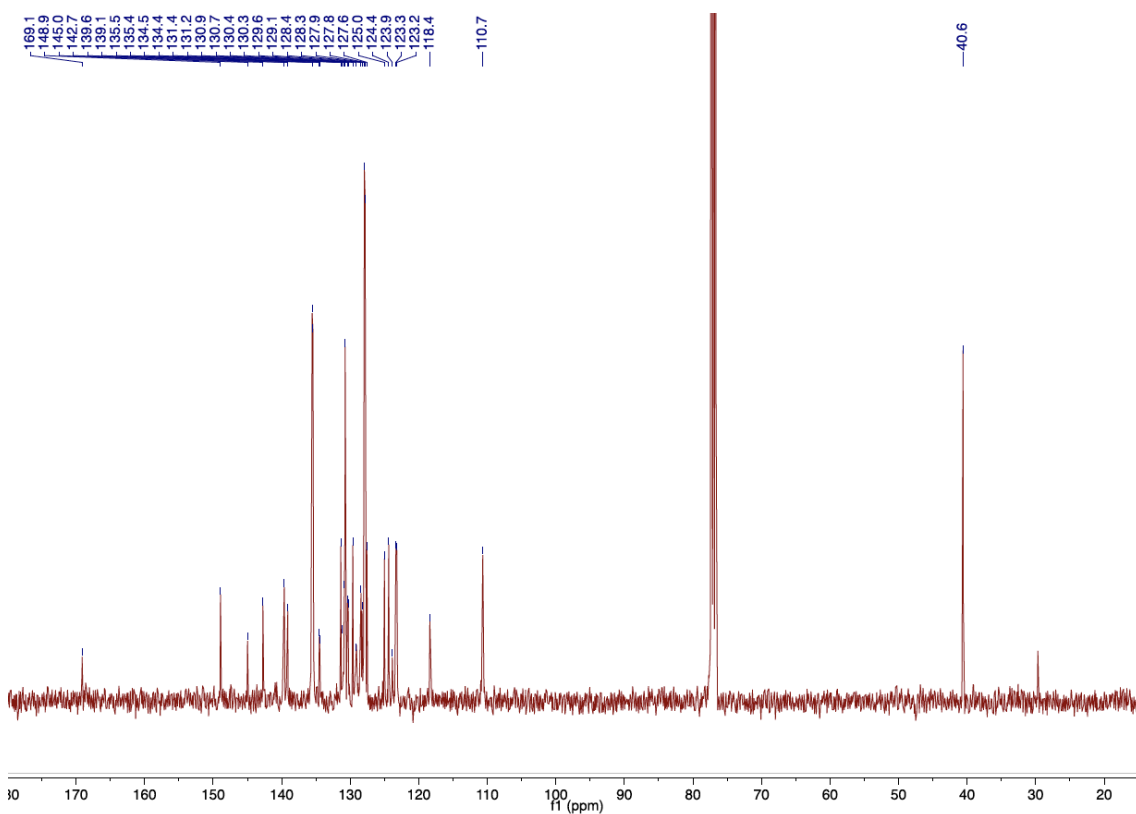

$^{31}\text{P}$ -NMR (162MHz,  $\text{CDCl}_3$ , 298K):

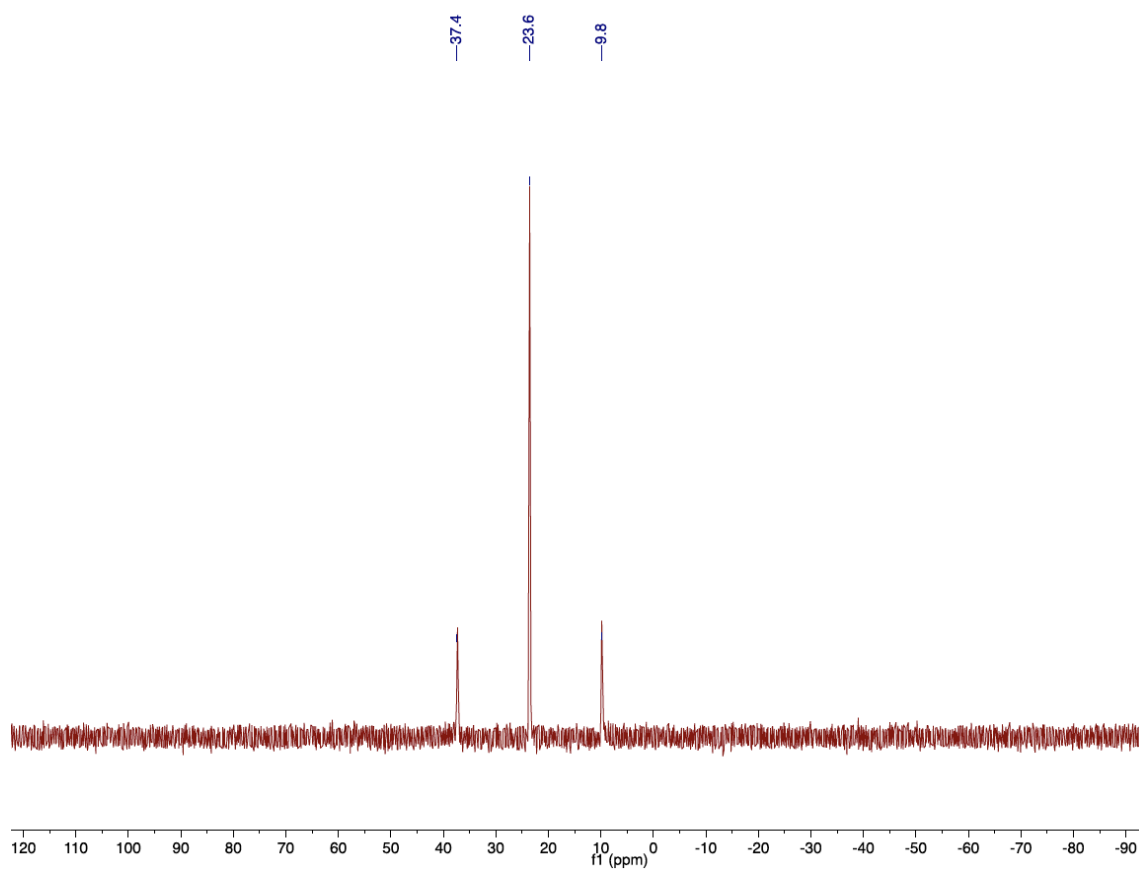

$^1\text{H-NMR}$  (400MHz,  $\text{CDCl}_3$ , 298K):

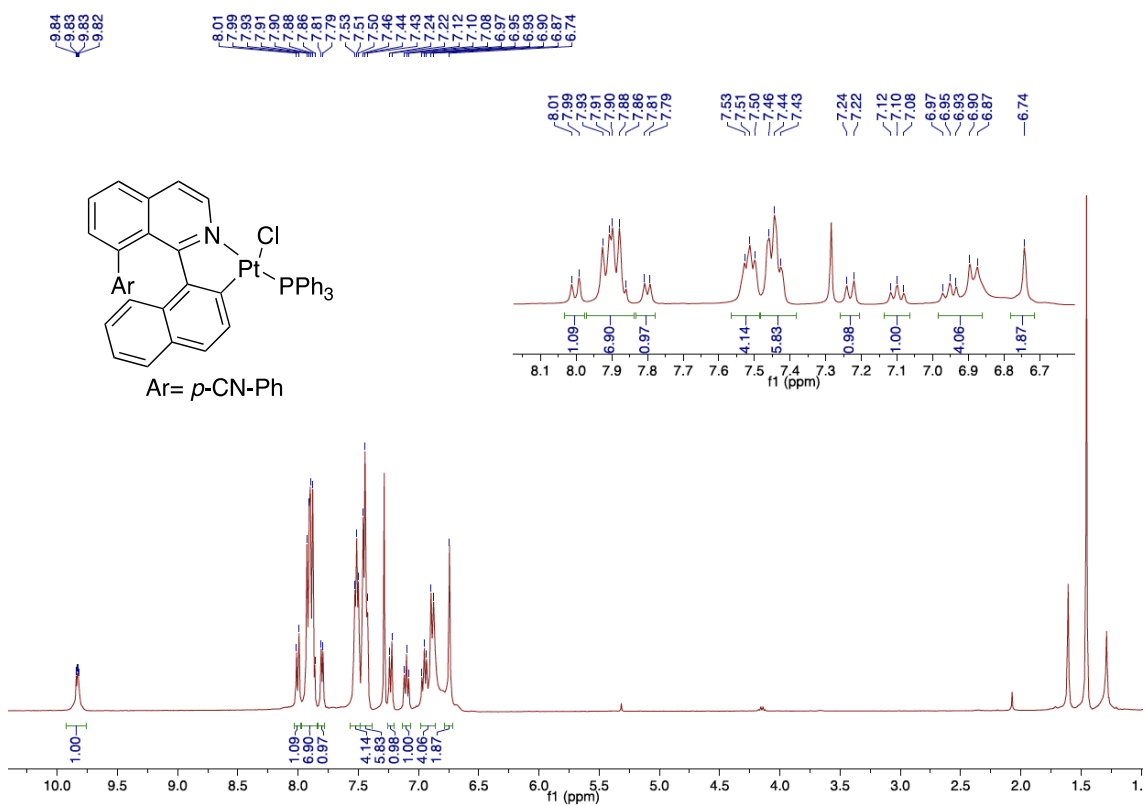

$^{13}\text{C-NMR}$  (100MHz,  $\text{CDCl}_3$ , 298K):

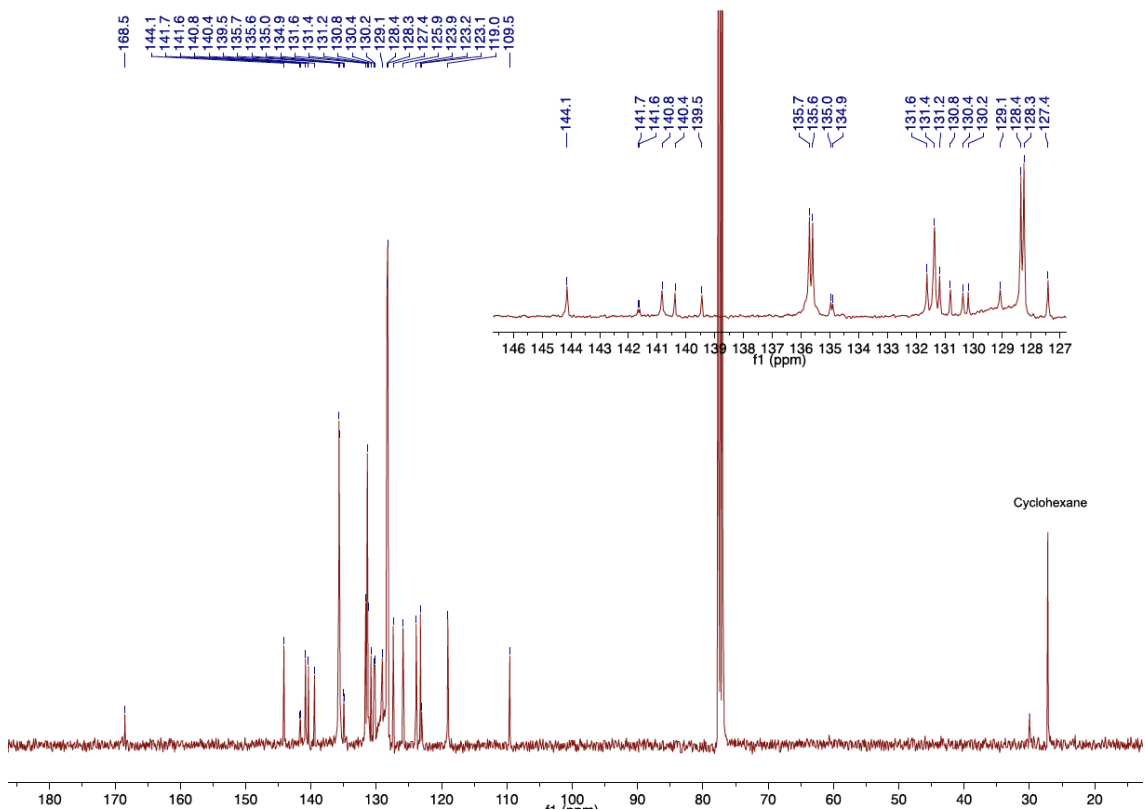

$^{31}\text{P}$ -NMR (162MHz,  $\text{CDCl}_3$ , 298K):

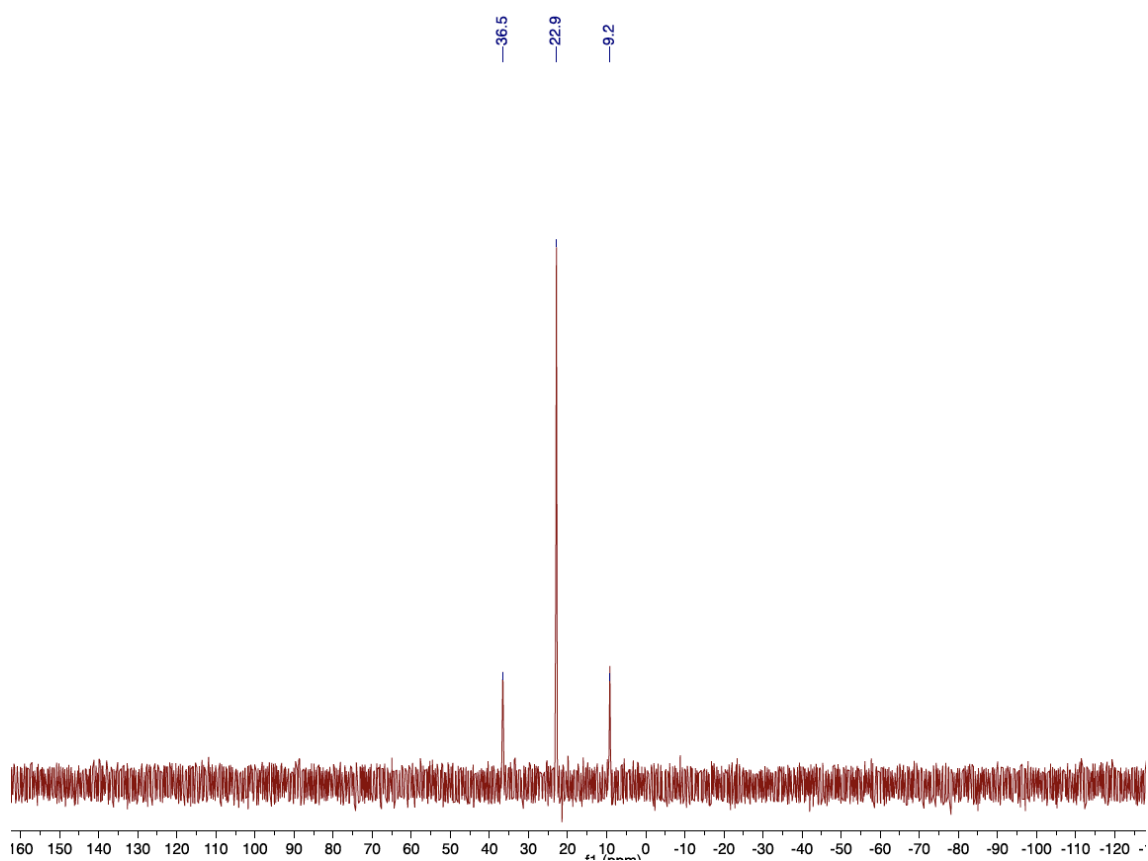

$^1\text{H-NMR}$  (400MHz,  $\text{CDCl}_3$ , 298K):

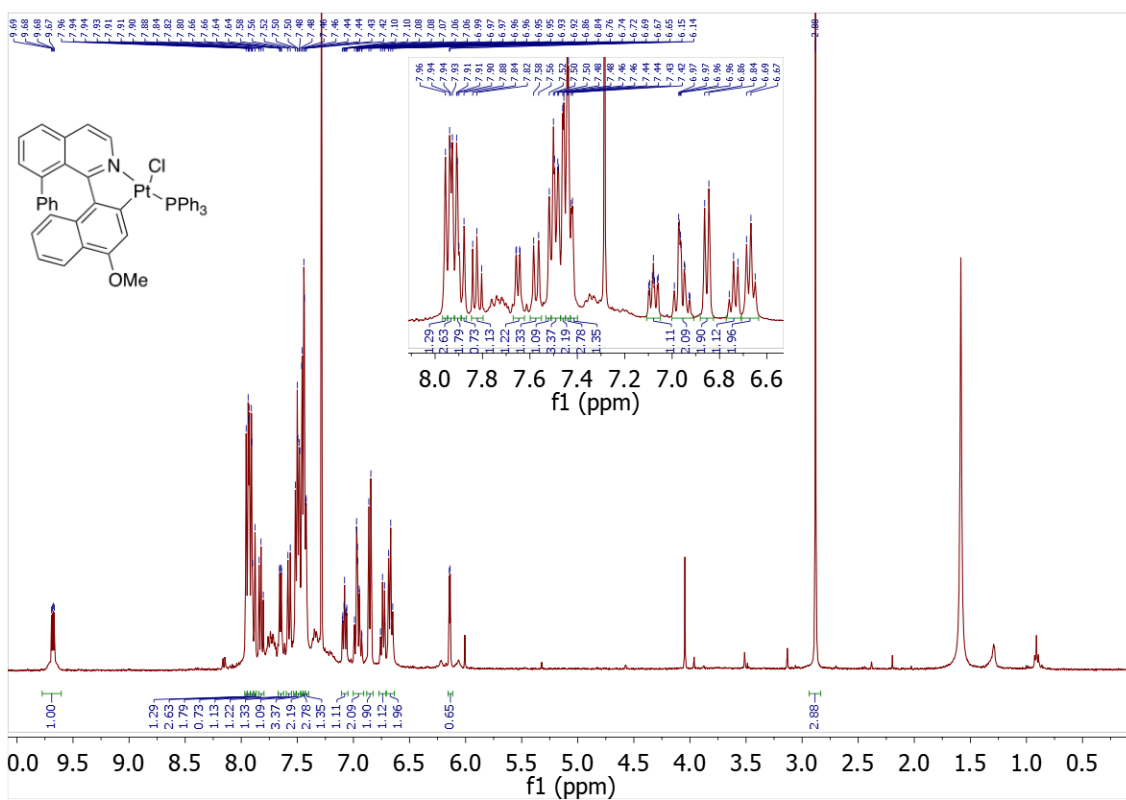

$^{13}\text{C-NMR}$  (100MHz,  $\text{CDCl}_3$ , 298K):

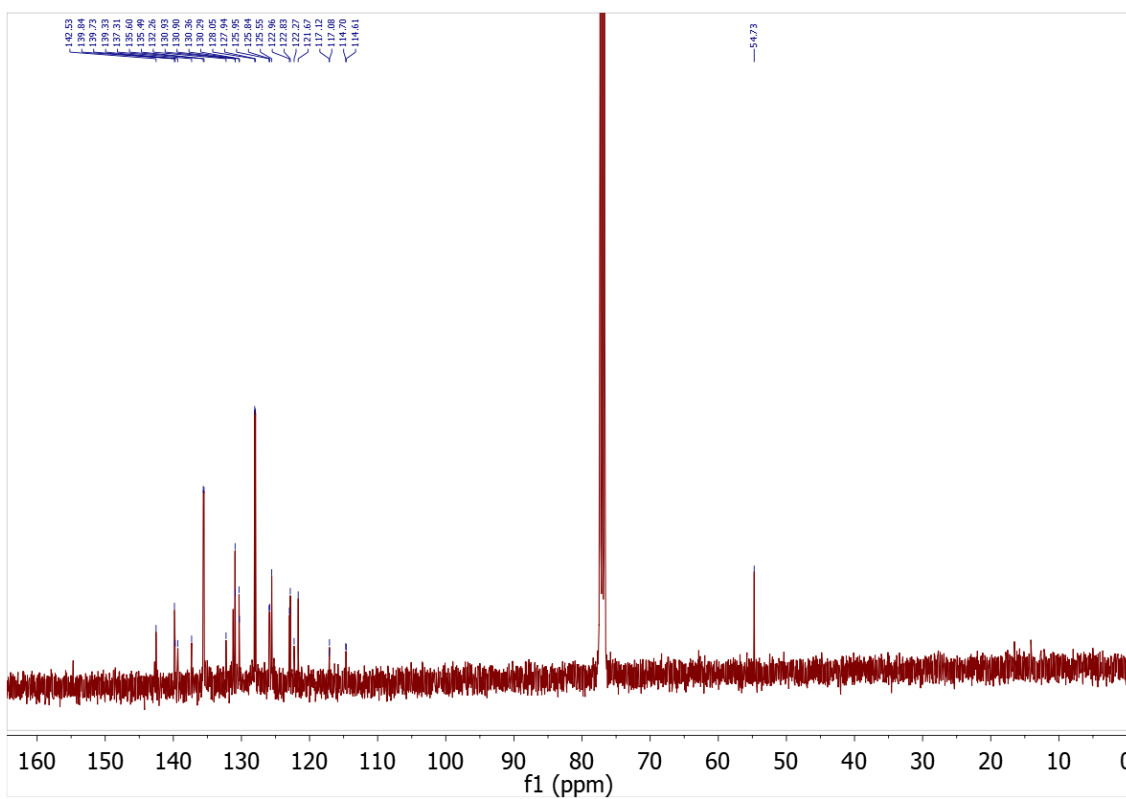

$^{31}\text{P-NMR}$  (162MHz,  $\text{CDCl}_3$ , 298K):

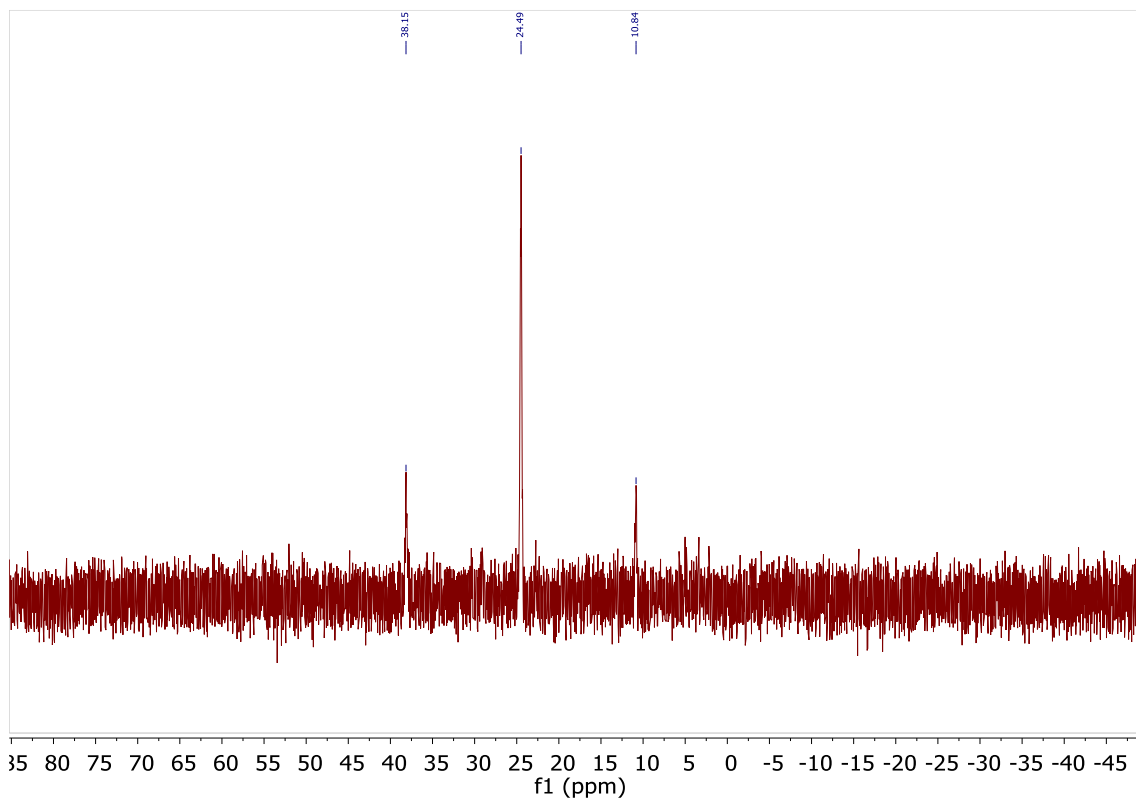

<sup>1</sup>H-NMR (400MHz, CDCl<sub>3</sub>, 298K):

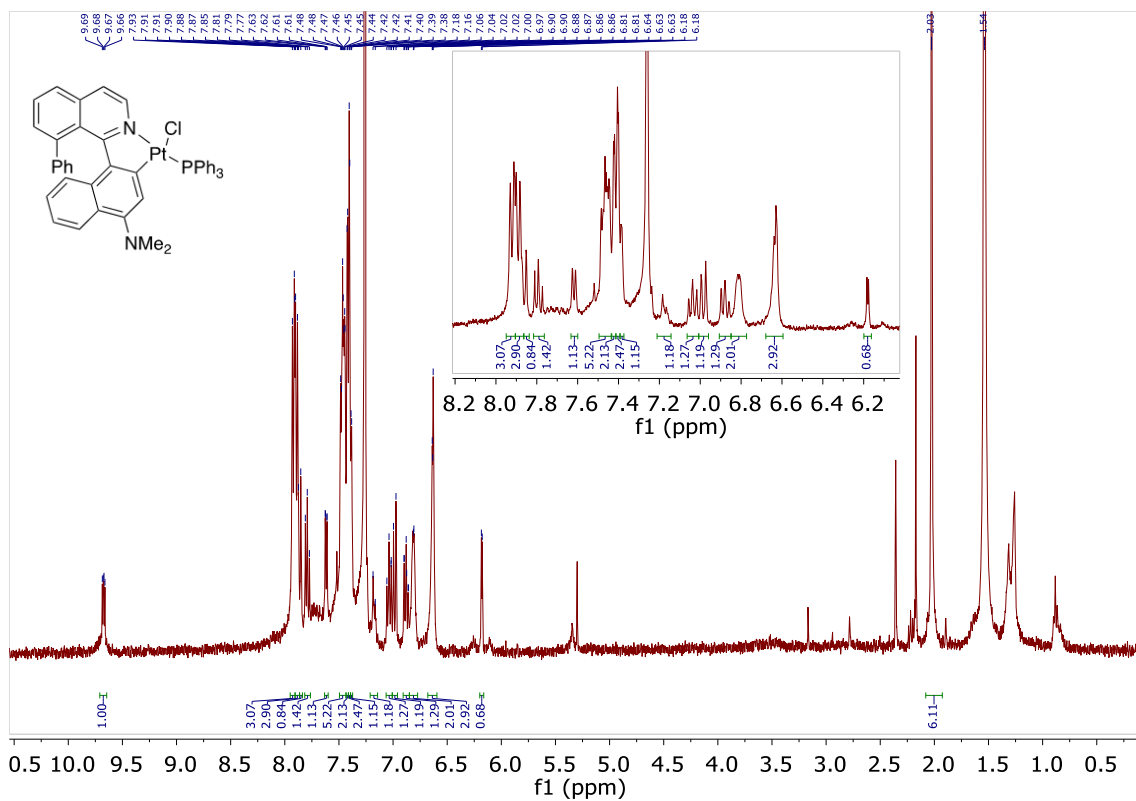



$^{13}\text{C}$ -NMR (100MHz,  $\text{CDCl}_3$ , 298K):

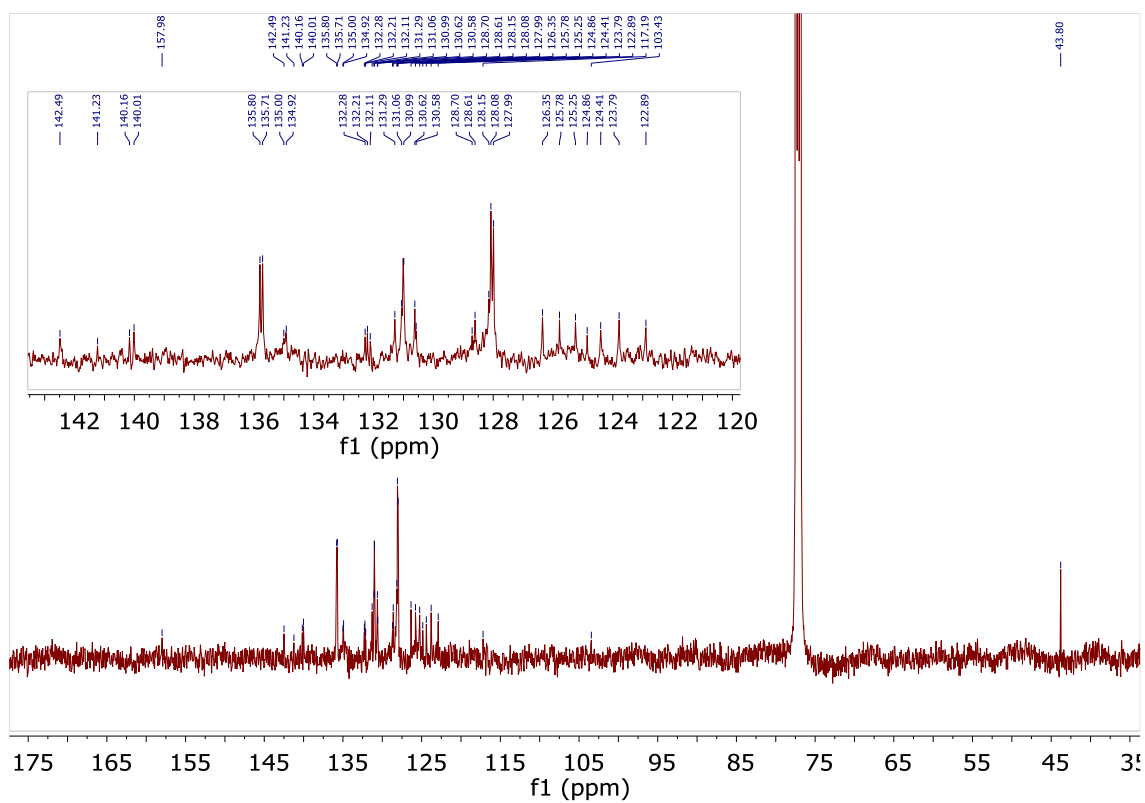

$^{31}\text{P}$ -NMR (162MHz,  $\text{CDCl}_3$ , 298K):

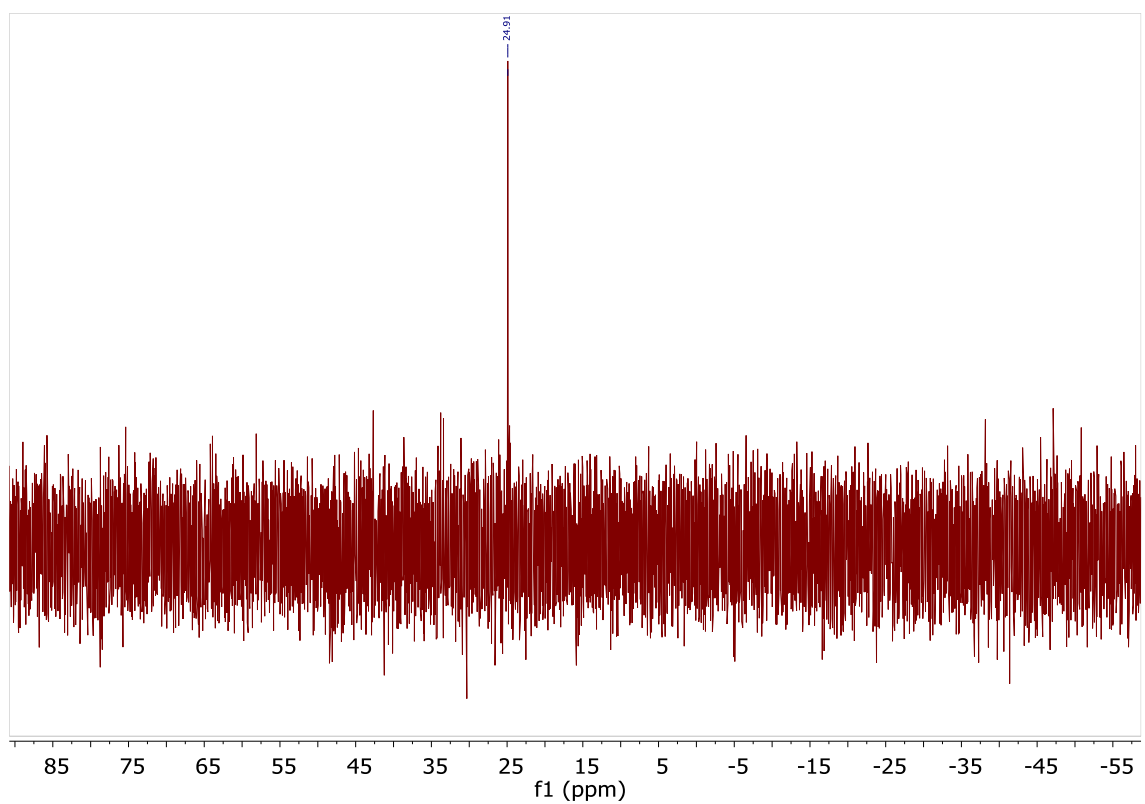

<sup>1</sup>H-NMR (400MHz, CDCl<sub>3</sub>, 298K):

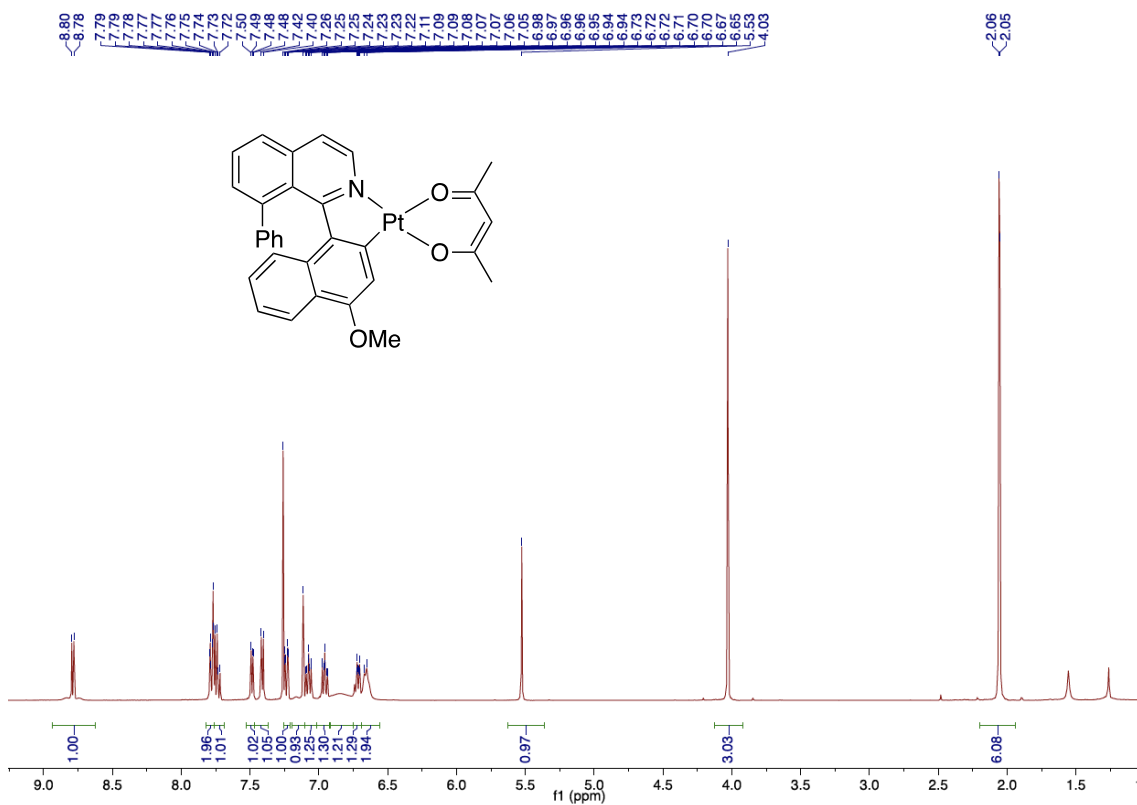

<sup>13</sup>C-NMR (100MHz, CDCl<sub>3</sub>, 298K):

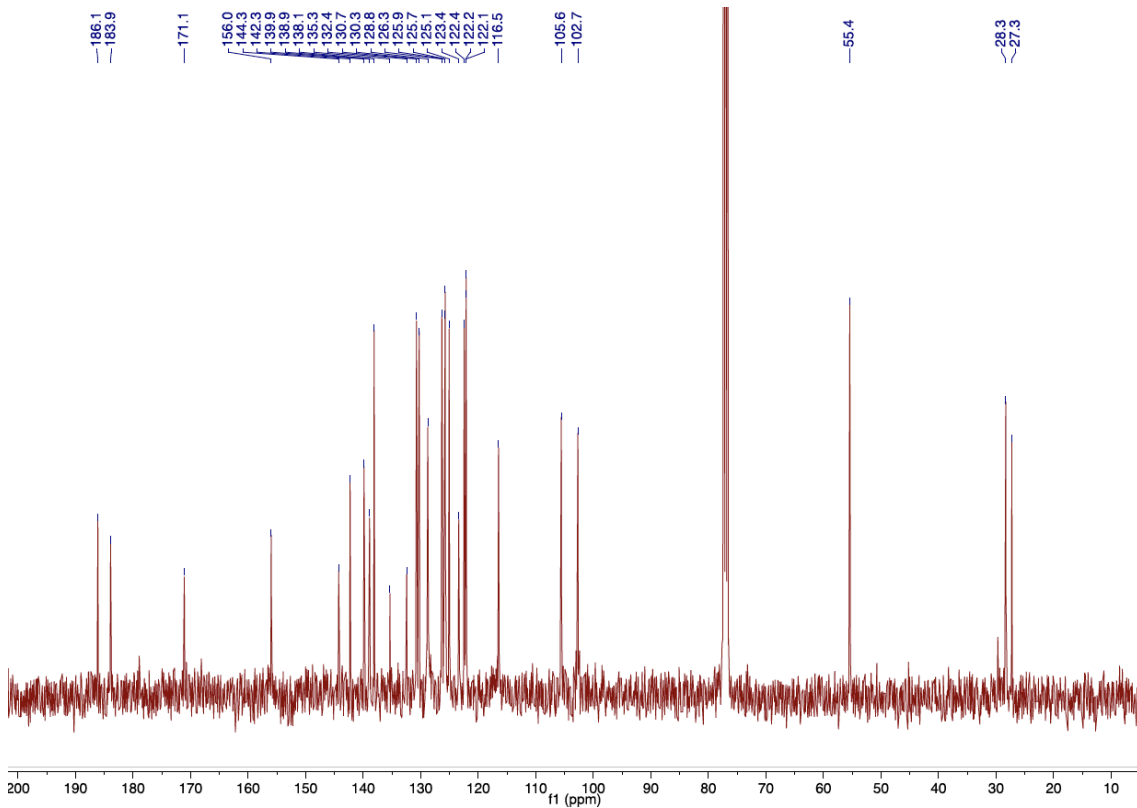

$^1\text{H-NMR}$  (400MHz,  $\text{CDCl}_3$ , 298K):

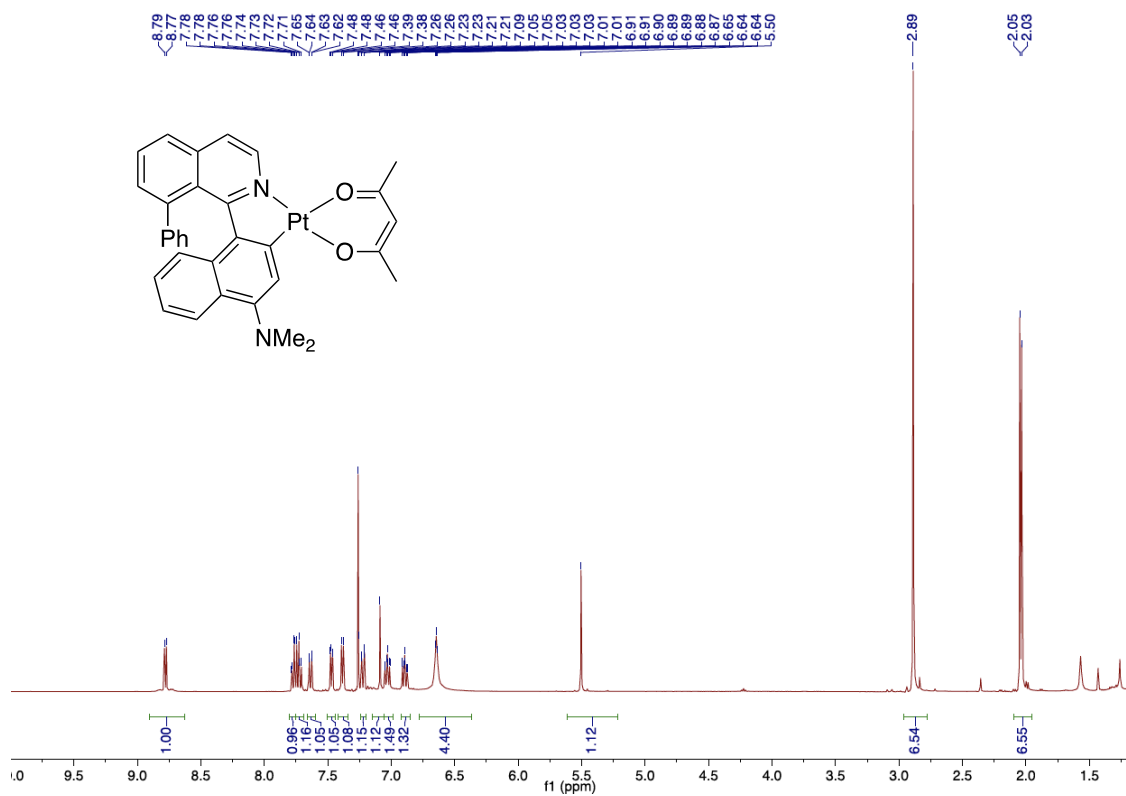

$^{13}\text{C-NMR}$  (100MHz,  $\text{CDCl}_3$ , 298K):

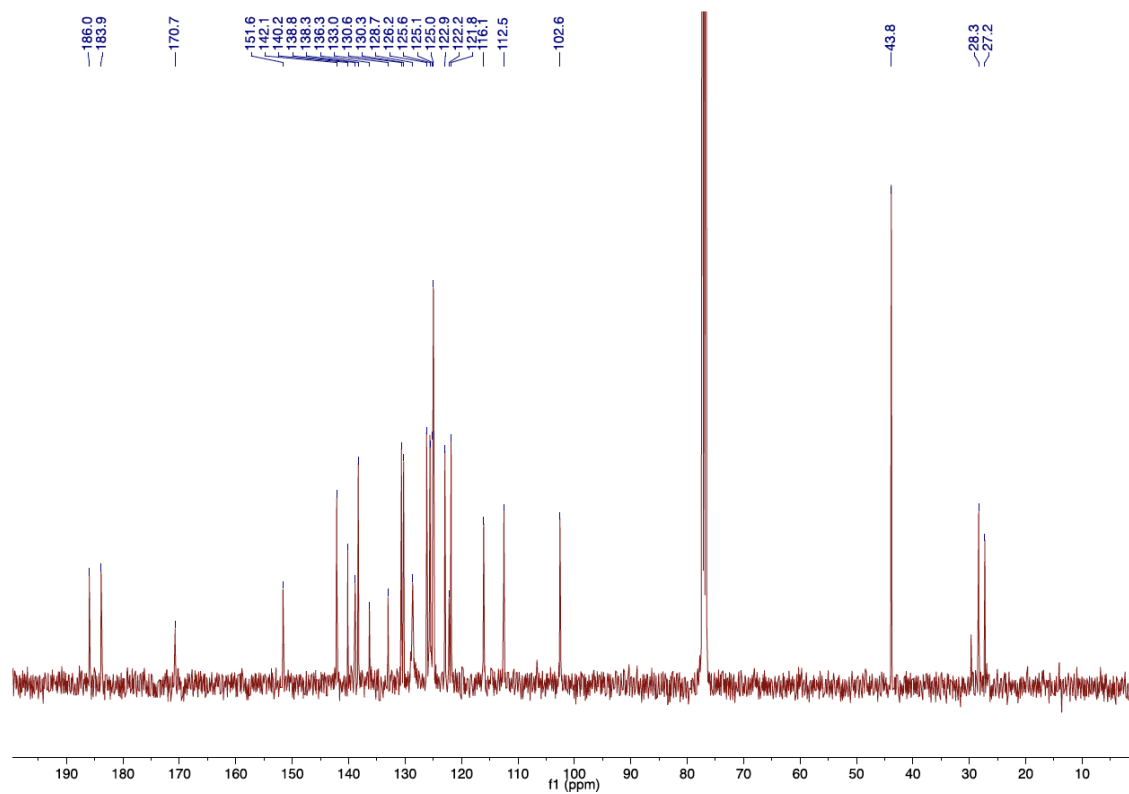

#### 4. UV-vis spectra of ligands and lifetime characterizations.

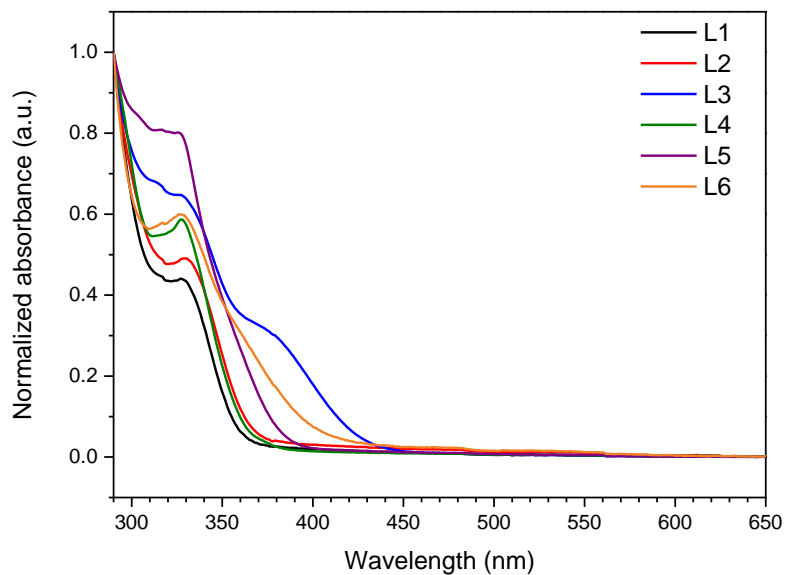

**Figure S1:** Normalized UV-vis absorption spectra of ligands **L1-L6** in toluene at room temperature.

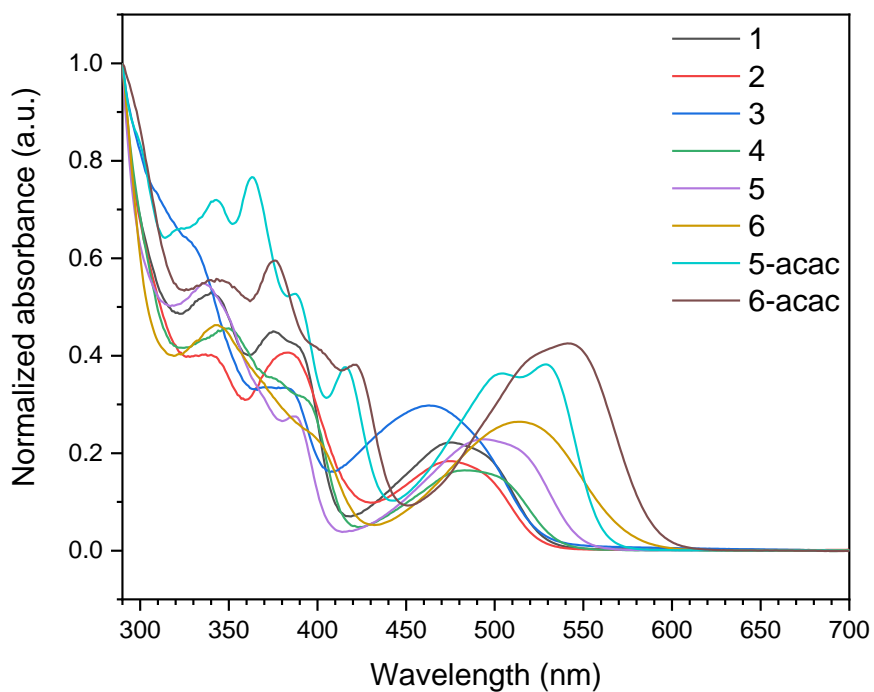

**Figure S2:** Normalized UV-vis absorption spectra of complexes **1-6**, **5-acac** and **6-acac** in toluene at room temperature.

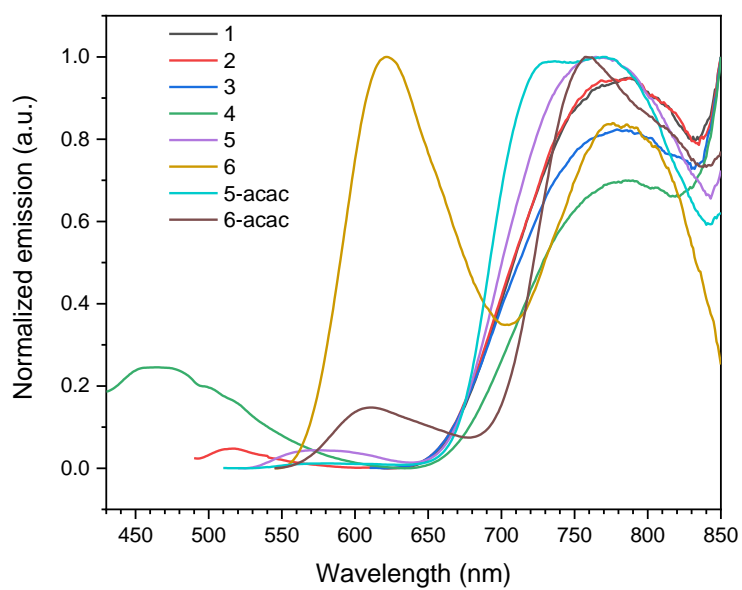

**Figure S3:** Normalized emission spectra recorded in aerated toluene at room temperature of complexes **1-6**, **5-acac** and **6-acac**,  $\lambda_{\text{ex}} = 300$  nm.

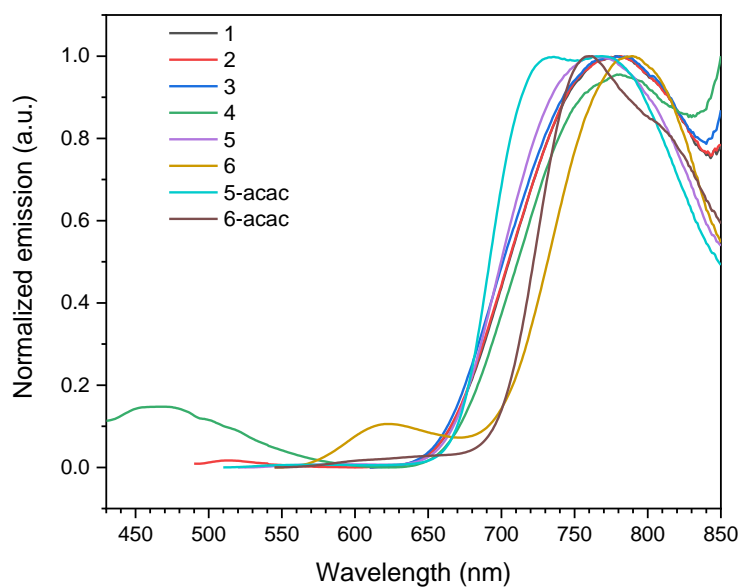

**Figure S4:** Normalized emission spectra recorded in degassed toluene at room temperature of complexes **1-6**, **5-acac** and **6-acac**,  $\lambda_{\text{ex}} = 300$  nm.

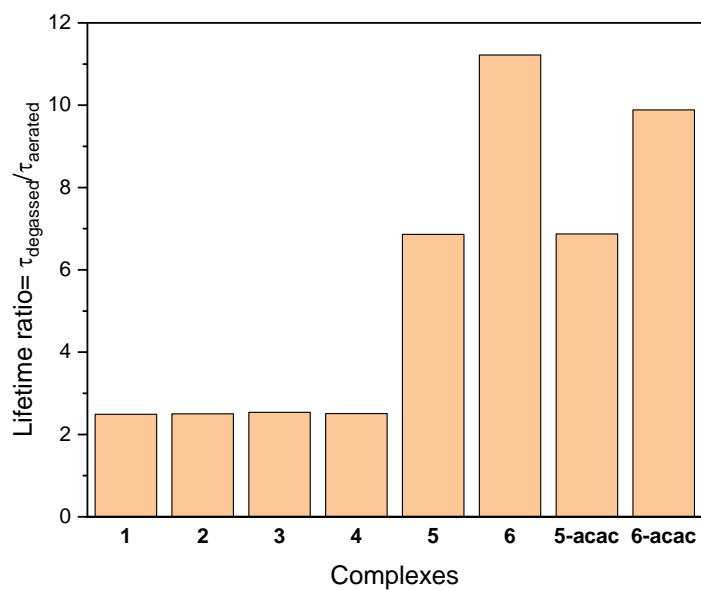

**Figure S5:** Phosphorescence lifetimes ratio in aerated and degassed toluene solution for complexes **1-6**, **5-acac** and **6-acac** at room temperature.

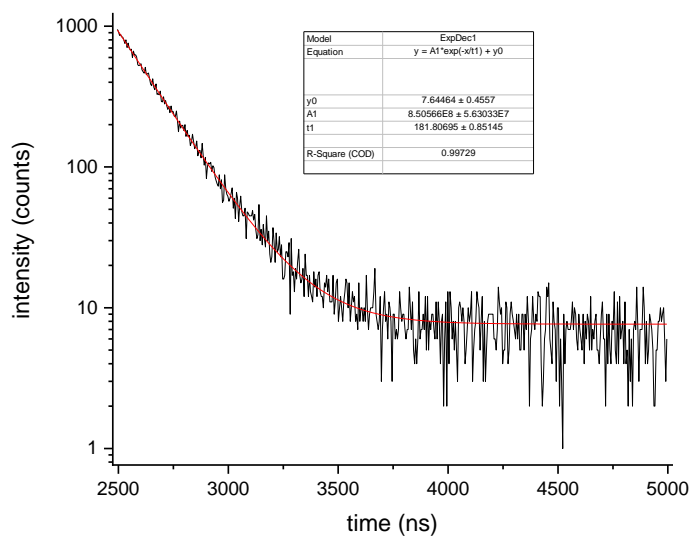

**Figure S6:** Phosphorescence decay of complex **1** in aerated toluene at room temperature.  $\lambda_{\text{ex}} = 400 \text{ nm}$ ,  $\lambda_{\text{em}} = 750 \text{ nm}$ .

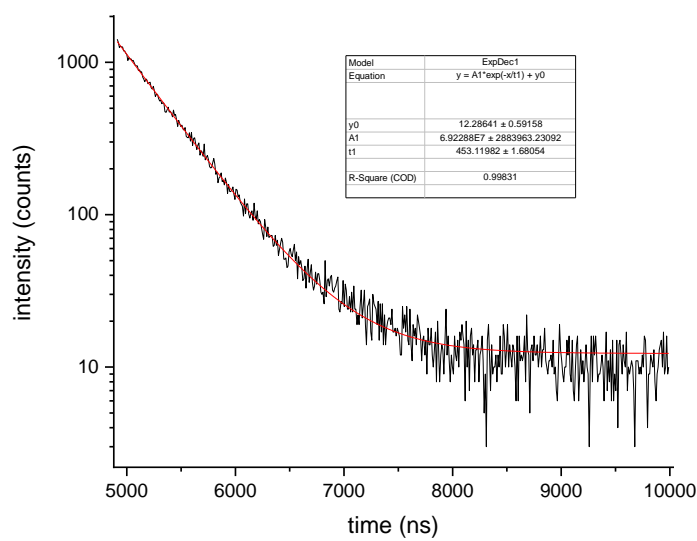

**Figure S7:** Phosphorescence decay of complex **1** in degassed toluene at room temperature.  $\lambda_{\text{ex}} = 400 \text{ nm}$ ,  $\lambda_{\text{em}} = 750 \text{ nm}$ .

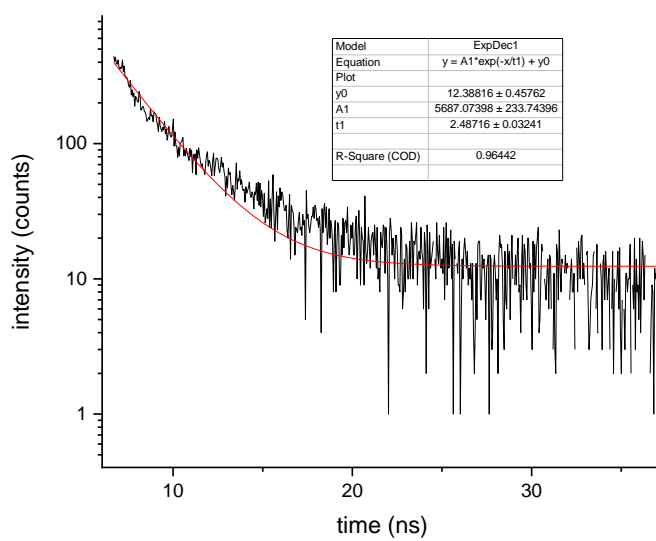

**Figure S8:** Fluorescence decay of complex **2** in aerated toluene at room temperature.  $\lambda_{\text{ex}} = 400 \text{ nm}$ ,  $\lambda_{\text{em}} = 520 \text{ nm}$ .

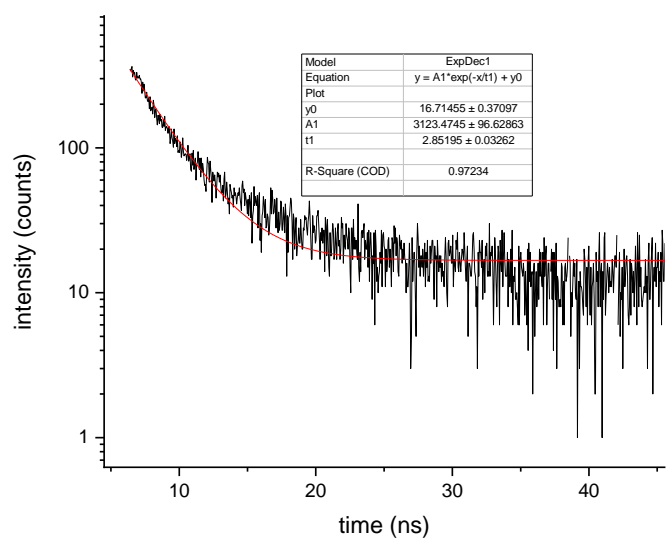

**Figure S9:** Fluorescence decay of complex **2** in degassed toluene at room temperature.  $\lambda_{ex}$ = 400 nm,  $\lambda_{em}$ = 520 nm.

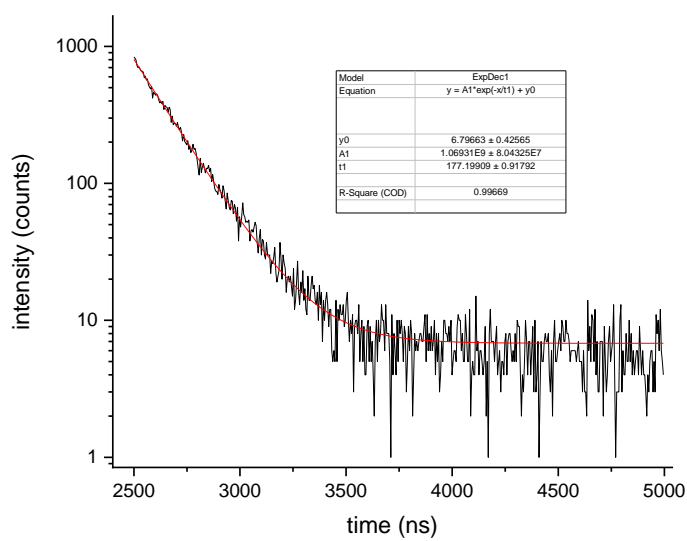

**Figure S10:** Phosphorescence decay of complex **2** in aerated toluene at room temperature.  $\lambda_{ex}$ = 400 nm,  $\lambda_{em}$ = 750 nm.



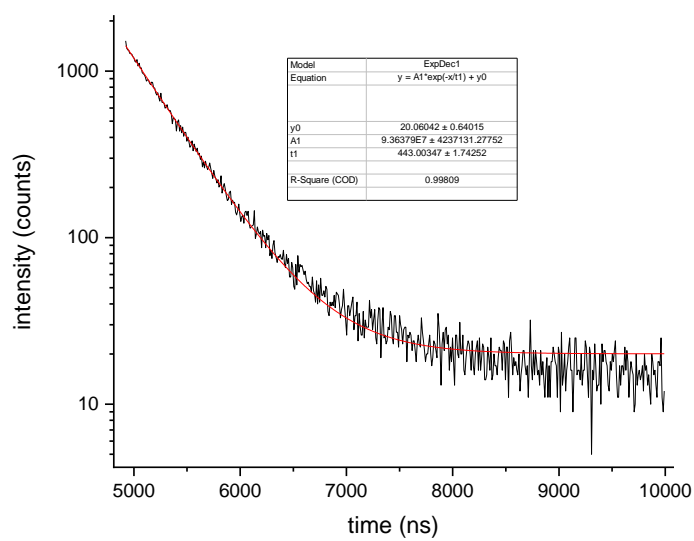

**Figure S11:** Phosphorescence decay of complex **2** in degassed toluene at room temperature.  $\lambda_{ex}$ = 400 nm,  $\lambda_{em}$ = 750 nm.

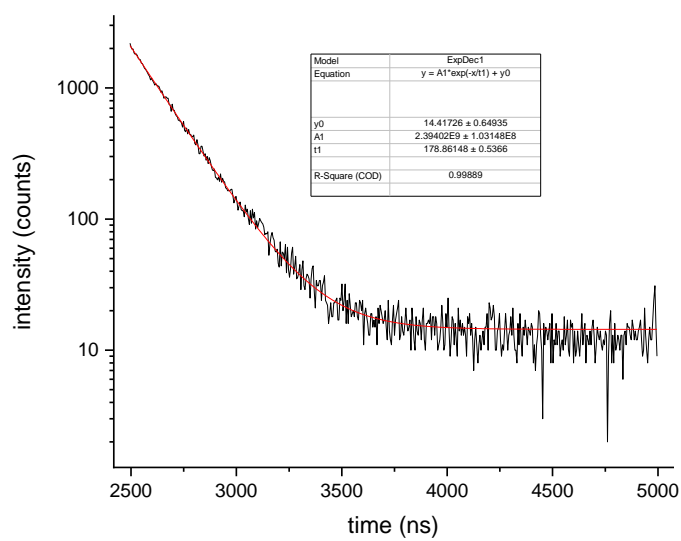

**Figure S12:** Phosphorescence decay of complex **3** in aerated toluene at room temperature.  $\lambda_{ex}$ = 400 nm,  $\lambda_{em}$ = 750 nm.

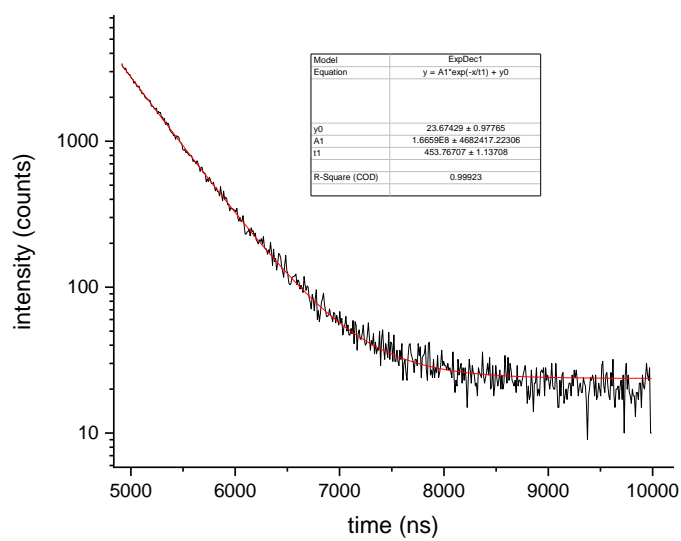

**Figure S13:** Phosphorescence decay of complex **3** in degassed toluene at room temperature.  $\lambda_{ex}$ = 400 nm,  $\lambda_{em}$ = 750 nm.

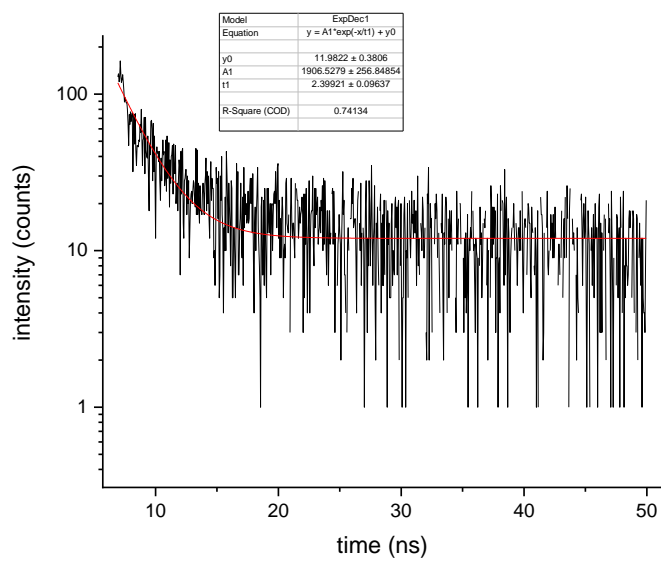

**Figure S14:** Fluorescence decay of complex **4** in aerated toluene at room temperature.  $\lambda_{ex}$ = 400 nm,  $\lambda_{em}$ = 460 nm.

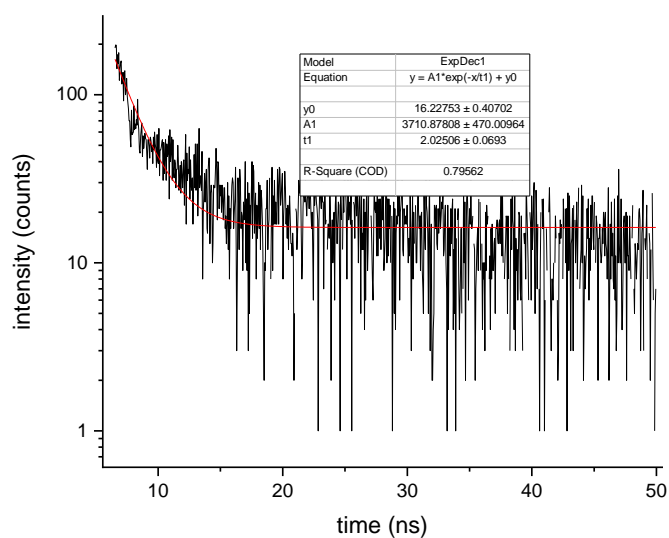

**Figure S15:** Fluorescence decay of complex **4** in degassed toluene at room temperature.  $\lambda_{\text{ex}} = 400$  nm,  $\lambda_{\text{em}} = 460$  nm.

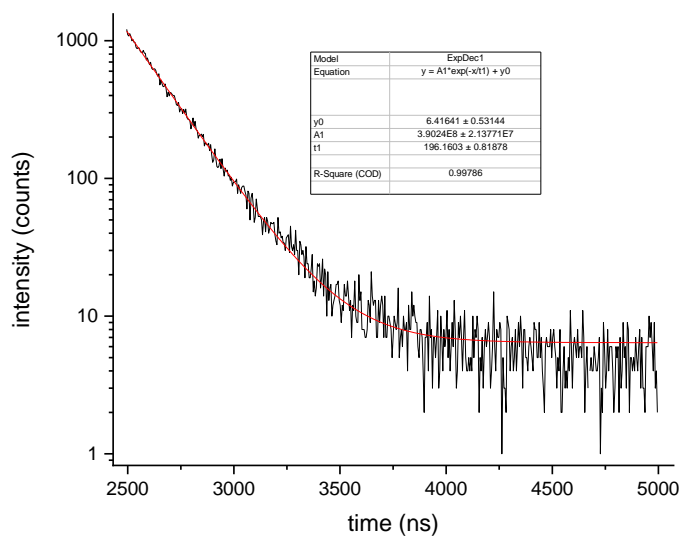

**Figure S16:** Phosphorescence decay of complex **4** in aerated toluene at room temperature.  $\lambda_{\text{ex}} = 400$  nm,  $\lambda_{\text{em}} = 750$  nm.

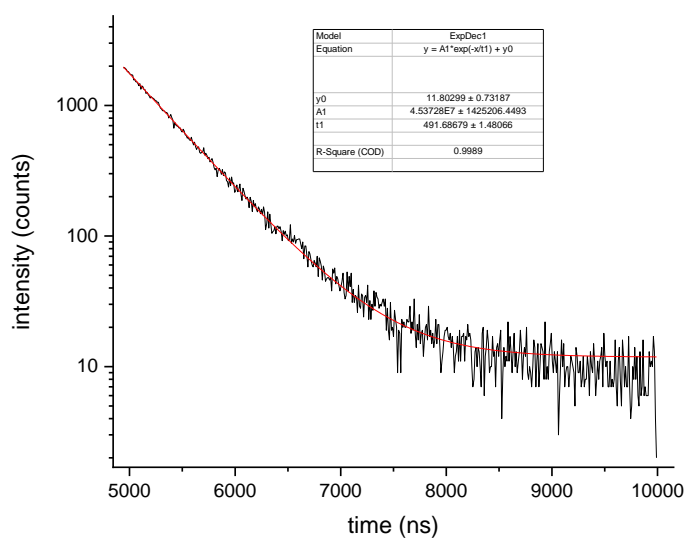

**Figure S17:** Phosphorescence decay of complex **4** in degassed toluene at room temperature.  $\lambda_{\text{ex}} = 400$  nm,  $\lambda_{\text{em}} = 750$  nm.

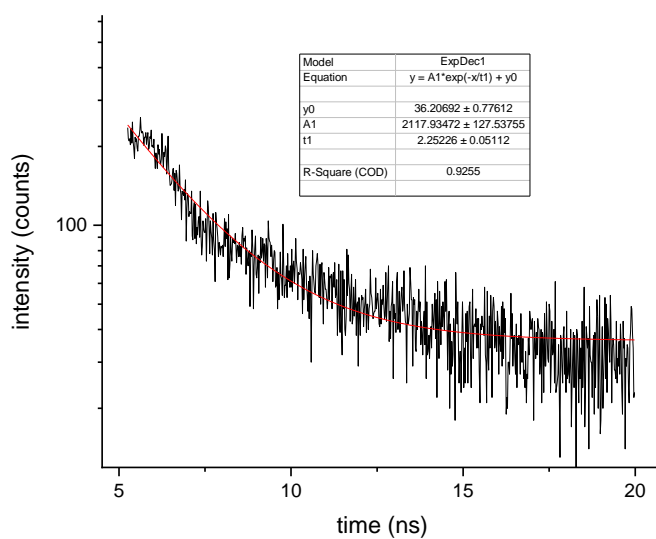

**Figure S18:** Fluorescence decay of complex **5** in aerated toluene at room temperature.  $\lambda_{\text{ex}} = 400$  nm,  $\lambda_{\text{em}} = 575$  nm.

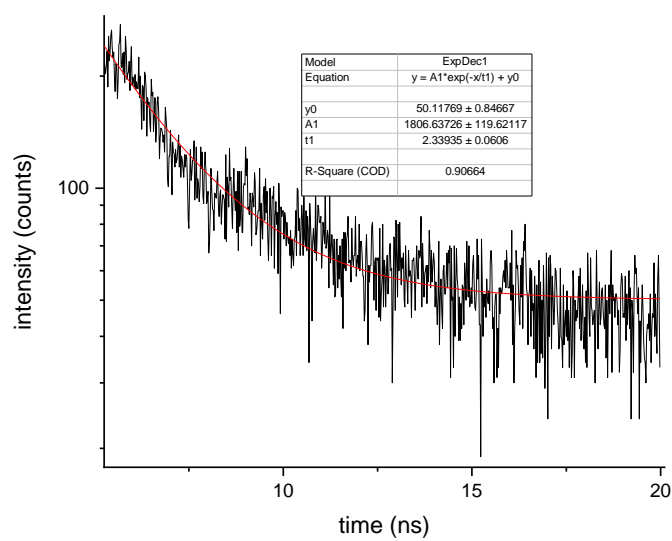

**Figure S19:** Fluorescence decay of complex **5** in degassed toluene at room temperature.  $\lambda_{ex}$ = 400 nm,  $\lambda_{em}$ = 575 nm.

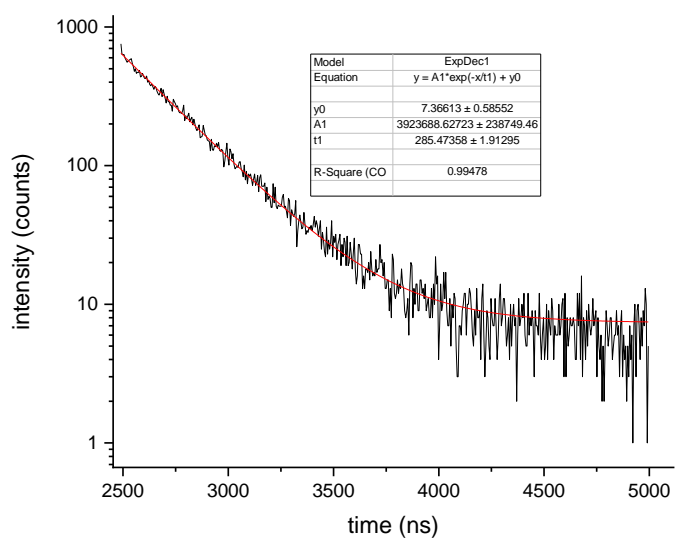

**Figure S20:** Phosphorescence decay of complex **5** in aerated toluene at room temperature.  $\lambda_{ex}$ = 400 nm,  $\lambda_{em}$ = 750 nm.

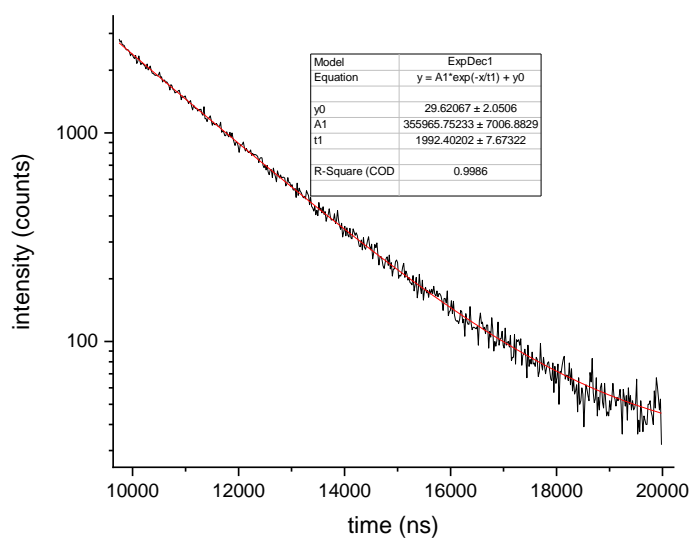

**Figure S21:** Phosphorescence decay of complex **5** in degassed toluene at room temperature.  $\lambda_{ex}$ = 400 nm,  $\lambda_{em}$ = 750 nm.

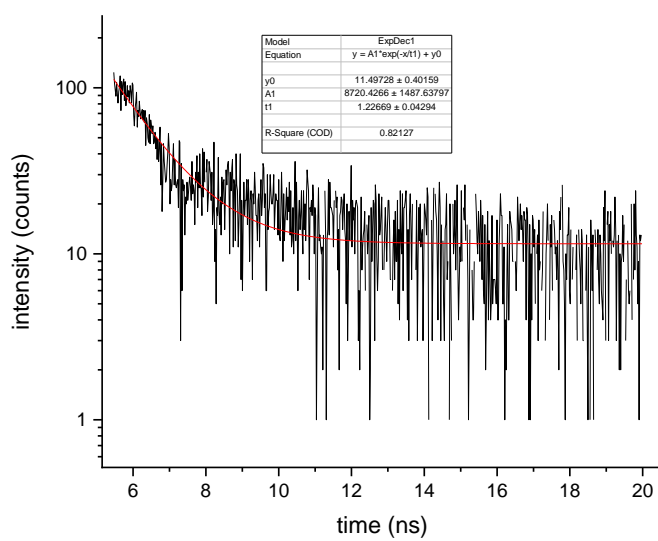

**Figure S22:** Fluorescence decay of complex **6** in aerated toluene at room temperature.  $\lambda_{ex}$ = 400 nm,  $\lambda_{em}$ = 620 nm.

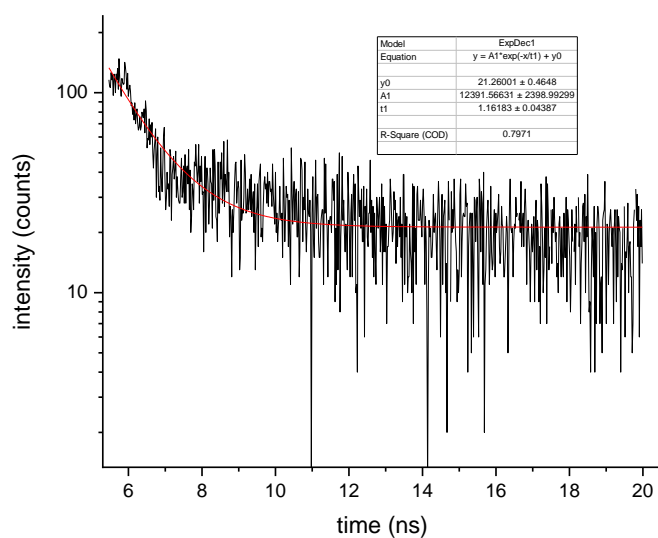

**Figure S23:** Fluorescence decay of complex **6** in degassed toluene at room temperature.  $\lambda_{\text{ex}} = 400$  nm,  $\lambda_{\text{em}} = 620$  nm.

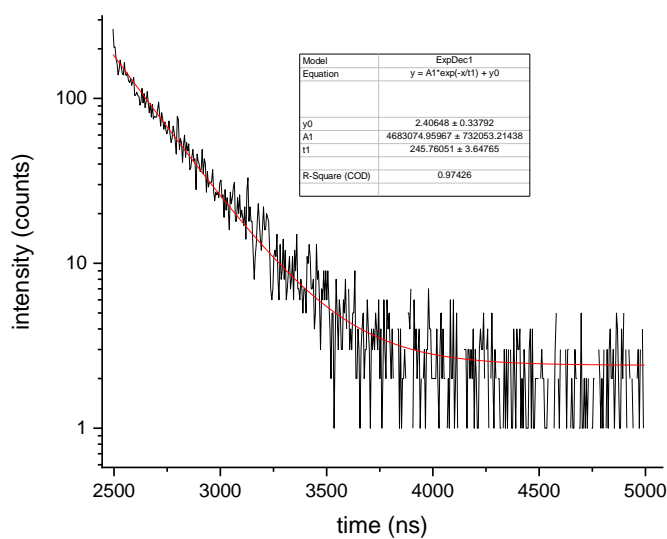

**Figure S24:** Phosphorescence decay of complex **6** in aerated toluene at room temperature.  $\lambda_{\text{ex}} = 400$  nm,  $\lambda_{\text{em}} = 750$  nm.

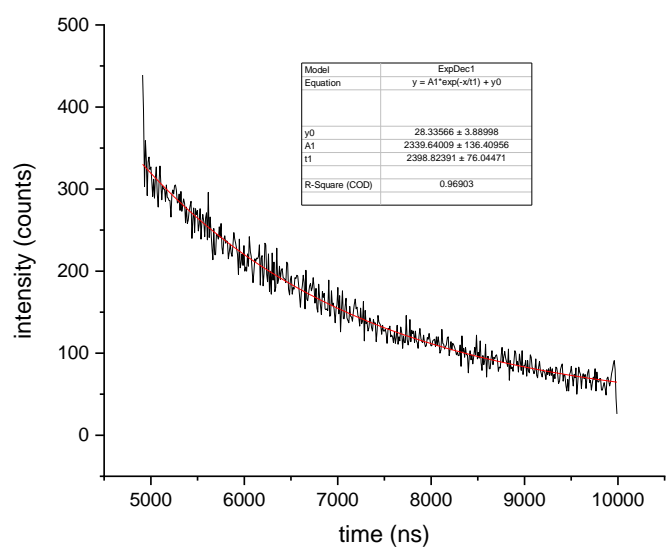

**Figure S25:** Phosphorescence decay of complex **6** in degassed toluene at room temperature.  $\lambda_{\text{ex}}= 400$  nm,  $\lambda_{\text{em}}= 750$  nm.

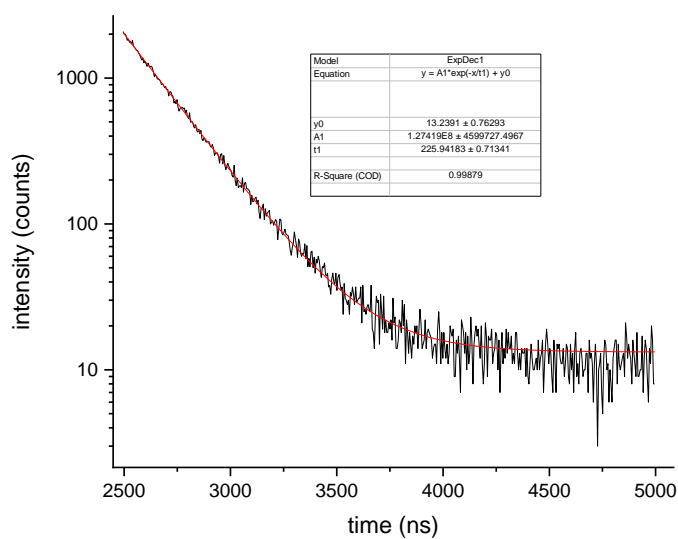

**Figure S26:** Phosphorescence decay of complex **5-acac** in aerated toluene at room temperature.  $\lambda_{\text{ex}}= 400$  nm,  $\lambda_{\text{em}}= 750$  nm.



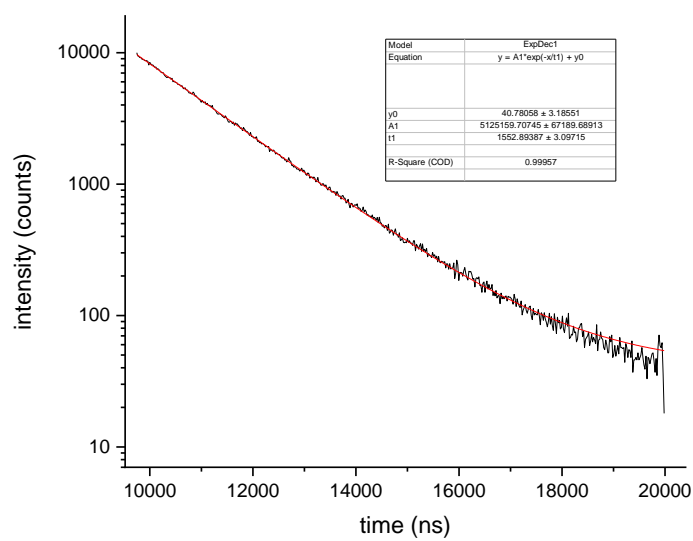

**Figure S27:** Phosphorescence decay of complex **5-acac** in degassed toluene at room temperature.  $\lambda_{ex}$ = 400 nm,  $\lambda_{em}$ = 750 nm.

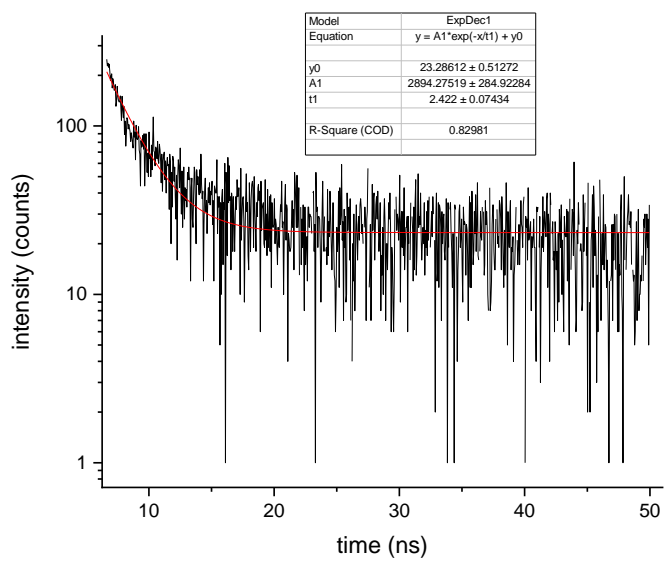

**Figure S28:** Fluorescence decay of complex **6-acac** in aerated toluene at room temperature.  $\lambda_{ex}$ = 400 nm,  $\lambda_{em}$ = 610 nm.

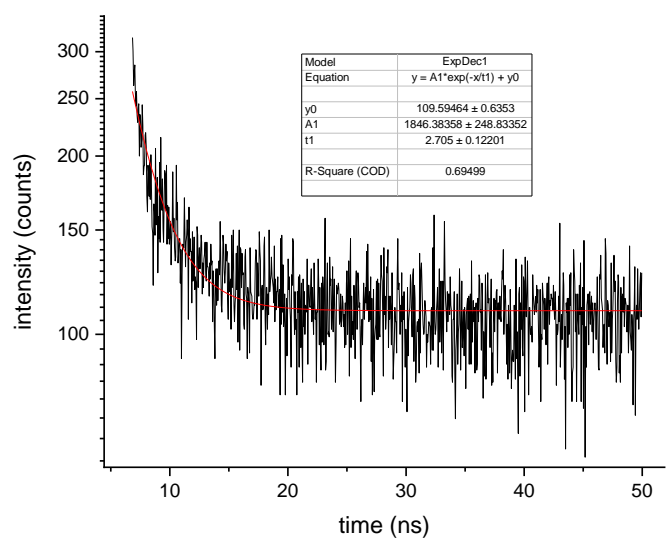

**Figure S29:** Fluorescence decay of complex **6-acac** in degassed toluene at room temperature.  $\lambda_{ex}$ = 400 nm,  $\lambda_{em}$ = 610 nm.

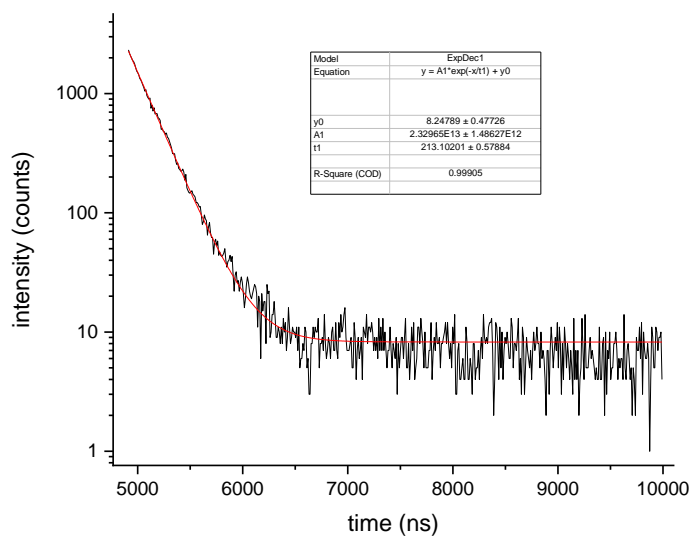

**Figure S30:** Phosphorescence decay of complex **6-acac** in aerated toluene at room temperature.  $\lambda_{ex}$ = 400 nm,  $\lambda_{em}$ = 750 nm.

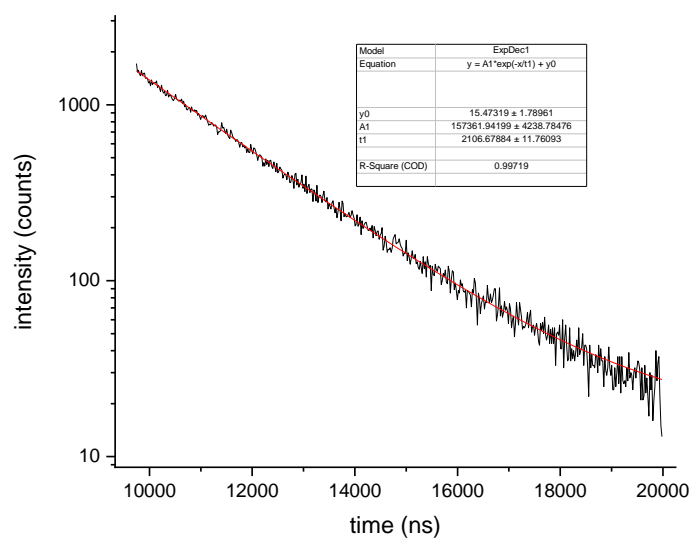

**Figure S31:** Phosphorescence decay of complex **6-acac** in degassed toluene at room temperature.  $\lambda_{ex}$ = 400 nm,  $\lambda_{em}$ = 750 nm.

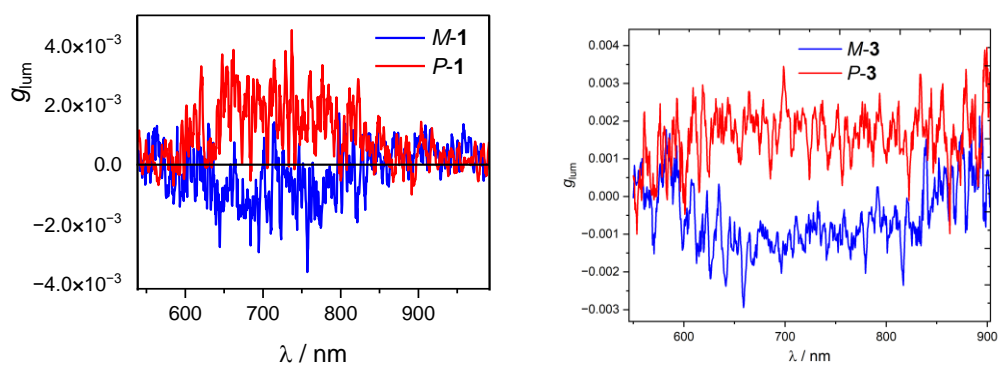

**Figure S32:** Luminescence dissymmetry factor  $g_{lum}$  spectra of complex **1** (left) and **3** (right) in degassed toluene at room temperature.

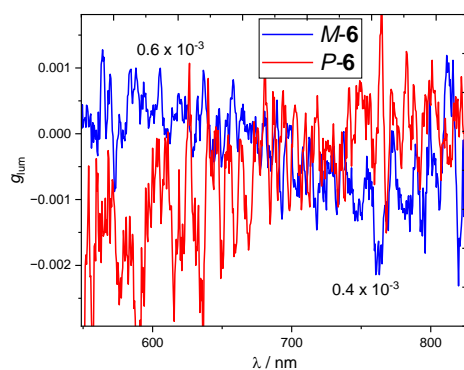

**Figure S33:** Luminescence dissymmetry factor  $g_{lum}$  spectra of complex **6** in degassed toluene at room temperature.

## 6. Chiral HPLC separation.

### Analytical chiral HPLC separation for compound 1

- The sample is dissolved in dichloromethane, injected on the chiral column, and detected with an UV detector at 254 nm. The flow-rate is 1 mL/min.

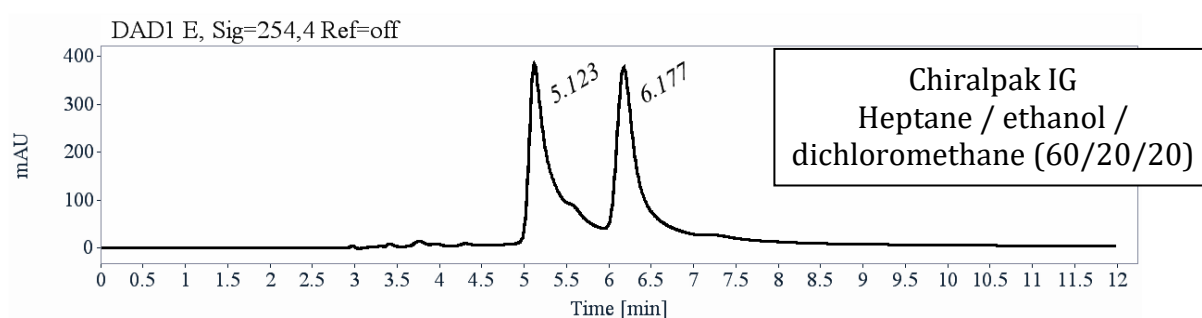

| RT [min] | Area  | Area%  | Capacity Factor | Enantioselectivity | Resolution (USP) |
|----------|-------|--------|-----------------|--------------------|------------------|
| 5.12     | 7267  | 51.40  | 0.74            |                    |                  |
| 6.18     | 6870  | 48.60  | 1.09            | 1.48               | 2.97             |
| Sum      | 14137 | 100.00 |                 |                    |                  |

### Preparative separation for compound 1:

- Sample preparation: About 50 mg of compound **1** are dissolved in 3.5 mL of dichloromethane.
- Chromatographic conditions: Chiralpak IG (250 x 10 mm), hexane / ethanol / dichloromethane (60/20/20) as mobile phase, flow-rate = 5 mL/min, UV detection at 254 nm.
- Injections (stacked): 50 times 70  $\mu$ L, every 7.4 minutes.
- First fraction: 23 mg of the first eluted enantiomer with ee > 99.5%

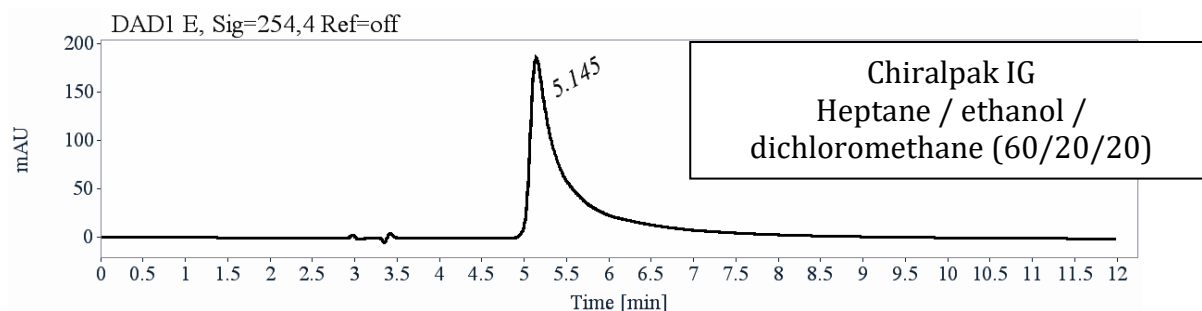

| RT [min] | Area | Area%  |
|----------|------|--------|
| 5.15     | 5282 | 100.00 |
| Sum      | 5282 | 100.00 |

- Second fraction: 21 mg of the second eluted enantiomer with ee >99.5 %

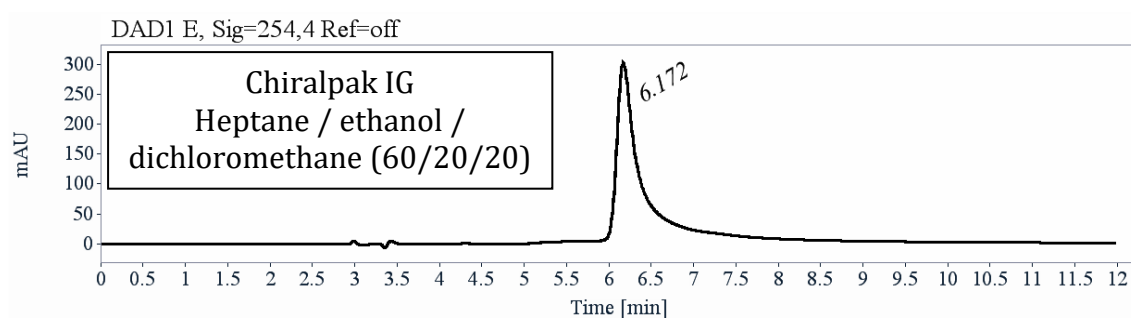

| RT [min] | Area | Area%  |
|----------|------|--------|
| 6.17     | 5997 | 100.00 |
| Sum      | 5997 | 100.00 |

## Analytical chiral HPLC separation for compound 2

- The sample is dissolved in dichloromethane, injected on the chiral column, and detected with an UV detector at 230 nm and a polarimetric detector. The flow-rate is 1 mL/min.

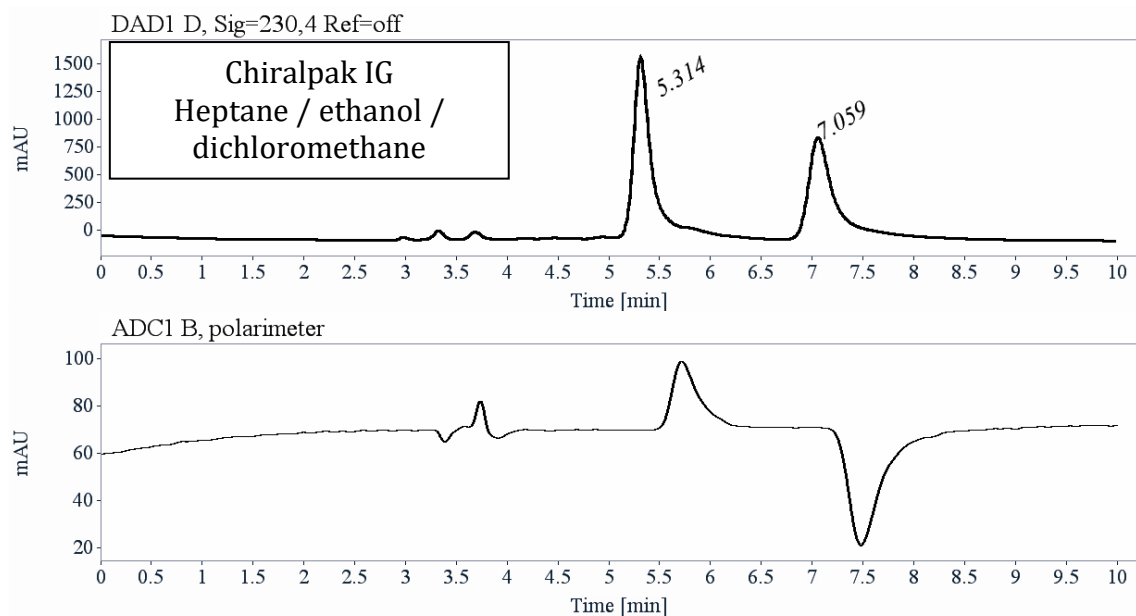

| RT [min] | Area  | Area%  | Capacity Factor | Enantioselectivity | Resolution (USP) |
|----------|-------|--------|-----------------|--------------------|------------------|
| 5.31     | 22297 | 58.14  | 0.80            |                    |                  |
| 7.06     | 16053 | 41.86  | 1.39            | 1.74               | 5.19             |
| Sum      | 38351 | 100.00 |                 |                    |                  |

### Preparative separation for compound 2:

- Sample preparation: About 60 mg of compound **2** are dissolved in 5 mL of dichloromethane.
- Chromatographic conditions: Chiralpak IG (250 x 10 mm), hexane / ethanol / dichloromethane (60/20/20) as mobile phase, flow-rate = 5 mL/min, UV detection at 254 nm.
- Injections (stacked): 50 times 100  $\mu$ L, every 9.3 minutes.
- First fraction: 31 mg of the first eluted enantiomer with ee > 99.5 %

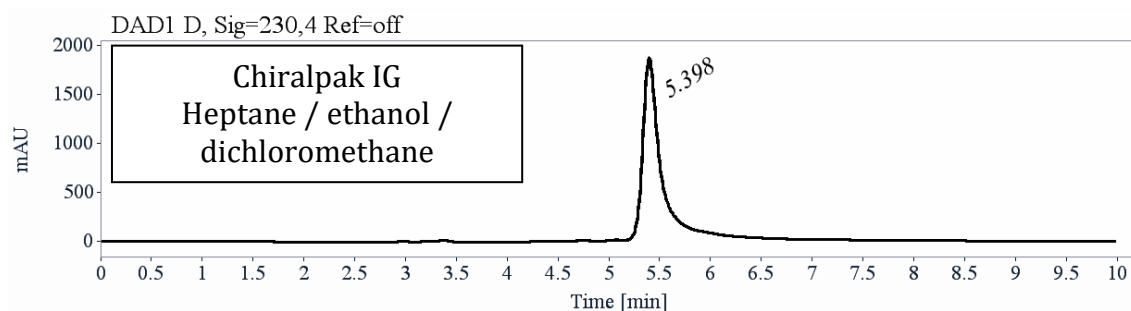

| RT [min] | Area  | Area%  |
|----------|-------|--------|
| 5.40     | 25993 | 100.00 |
| Sum      | 25993 | 100.00 |

- Second fraction: 27 mg of the second eluted enantiomer with ee > 99.5%

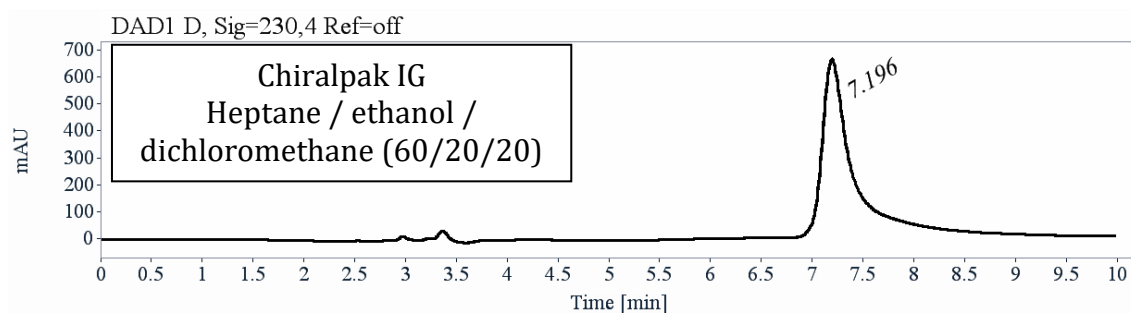

| RT [min] | Area  | Area%  |
|----------|-------|--------|
| 7.20     | 11625 | 100.00 |
| Sum      | 11625 | 100.00 |

### Analytical chiral HPLC separation for compound 3

- The sample is dissolved in dichloromethane, injected on the chiral column, and detected with an UV detector at 230 nm and a polarimeter. The flow-rate is 1 mL/min.

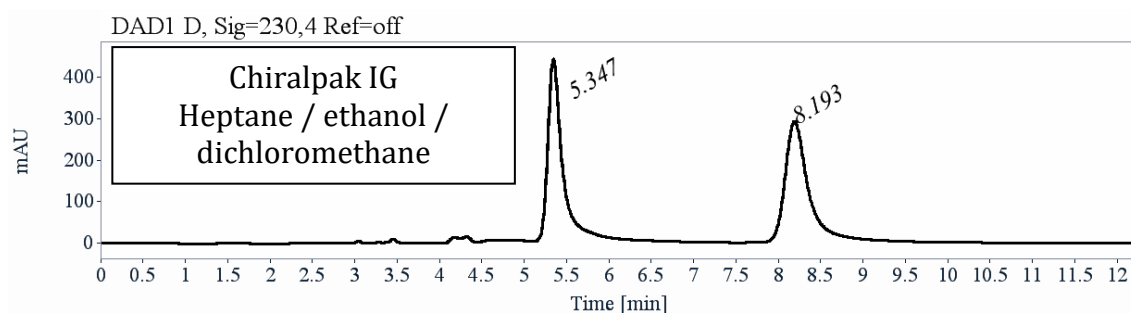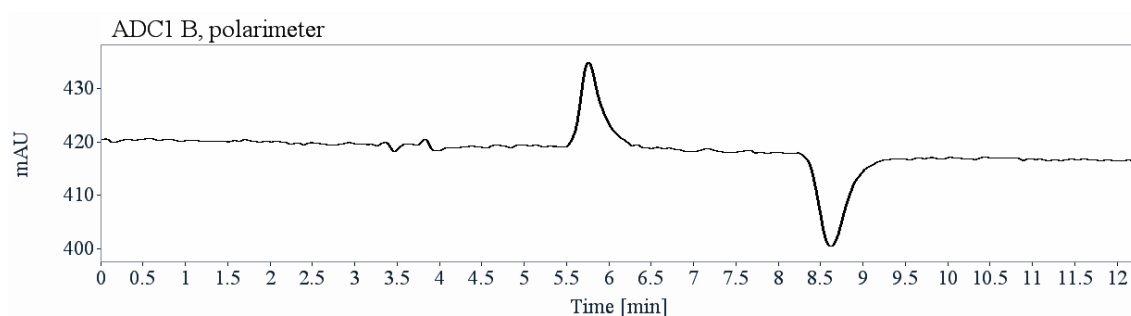

| RT [min] | Area  | Area%  | Capacity Factor | Enantioselectivity | Resolution (USP) |
|----------|-------|--------|-----------------|--------------------|------------------|
| 5.35     | 5658  | 49.34  | 0.81            |                    |                  |
| 8.19     | 5808  | 50.66  | 1.78            | 2.19               | 7.83             |
| Sum      | 11466 | 100.00 |                 |                    |                  |



### Preparative separation for compound 3:

- Sample preparation: About 75 mg of compound 3 are dissolved in 3 mL of dichloromethane.
- Chromatographic conditions: Chiralpak IG (250 x 10 mm), hexane / ethanol / dichloromethane (60/20/20) as mobile phase, flow-rate = 5 mL/min, UV detection at 254 nm.
- Injections (stacked): 20 times 150  $\mu$ L, every 12 minutes.
- First fraction: 36 mg of the first eluted enantiomer with ee > 99.5%

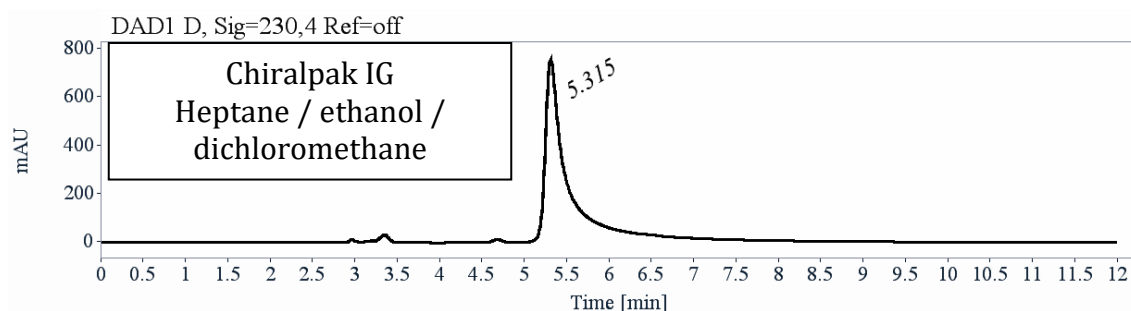

| RT [min] | Area  | Area%  |
|----------|-------|--------|
| 5.32     | 15232 | 100.00 |
| Sum      | 15232 | 100.00 |

- Second fraction: 35 mg of the second eluted enantiomer with ee > 98.5 %

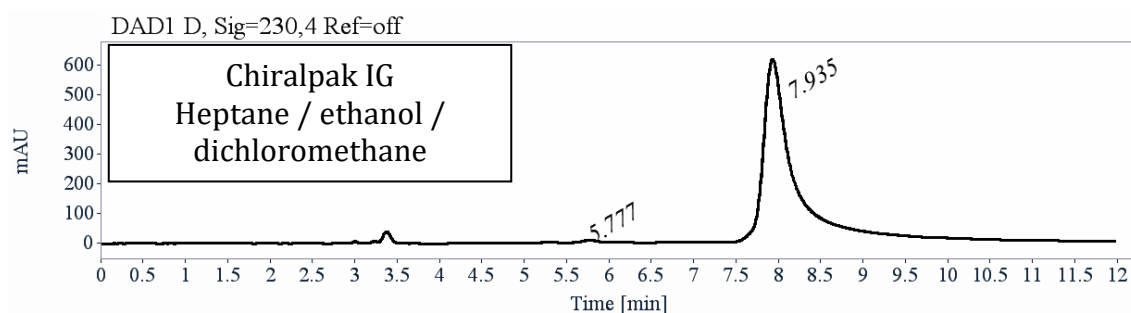

| RT [min] | Area  | Area%  |
|----------|-------|--------|
| 5.78     | 86    | 0.57   |
| 7.93     | 15010 | 99.43  |
| Sum      | 15096 | 100.00 |

### Analytical chiral HPLC separation for compound 4

- The sample is dissolved in dichloromethane, injected on the chiral column, and detected with an UV detector at 230 nm and a polarimetric detector. The flow-rate is 1 mL/min.

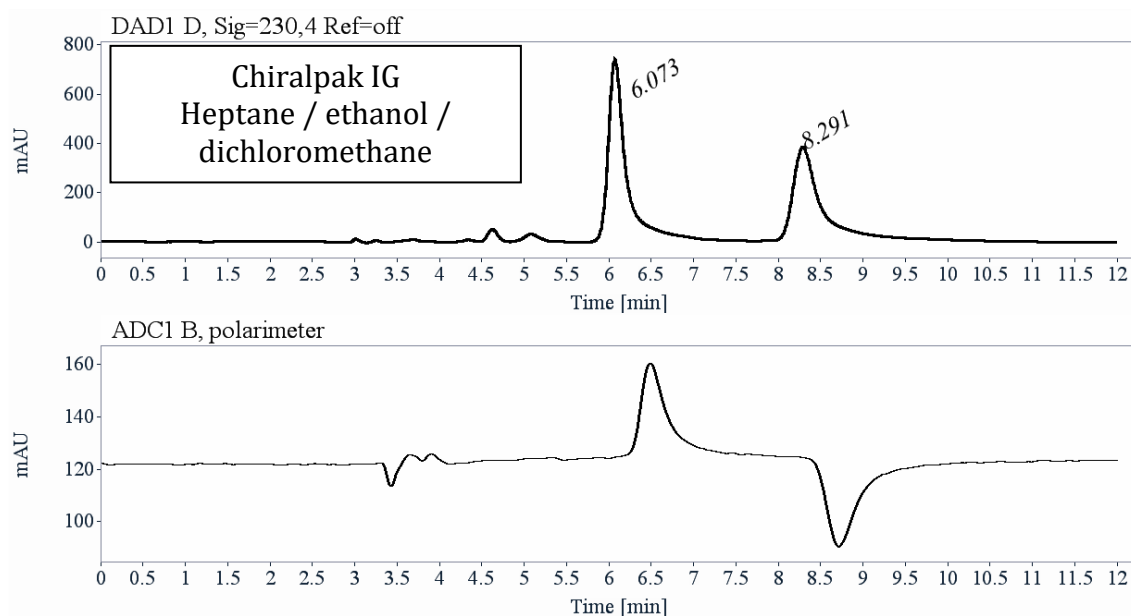

| RT [min] | Area  | Area%  | Capacity Factor | Enantioselectivity | Resolution (USP) |
|----------|-------|--------|-----------------|--------------------|------------------|
| 6.07     | 11693 | 55.79  | 1.06            |                    |                  |
| 8.29     | 9266  | 44.21  | 1.81            | 1.71               | 5.46             |
| Sum      | 20959 | 100.00 |                 |                    |                  |

#### Preparative separation for compound 4:

- Sample preparation: About 70 mg of compound 4 are dissolved in 5 mL of dichloromethane.
- Chromatographic conditions: Chiralpak IG (250 x 10 mm), hexane / ethanol / dichloromethane (60/20/20) as mobile phase, flow-rate = 5 mL/min, UV detection at 254 nm.
- Injections (stacked): 42 times 120  $\mu$ L, every 11.3 minutes.
- First fraction: 30 mg of the first eluted enantiomer with ee > 99.5%

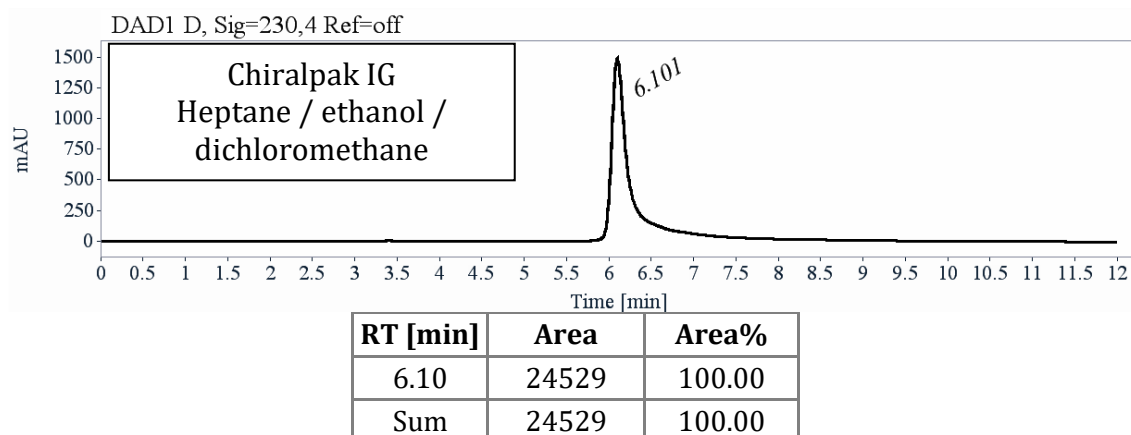

- Second fraction: 29 mg of the second eluted enantiomer with ee > 98.5 %

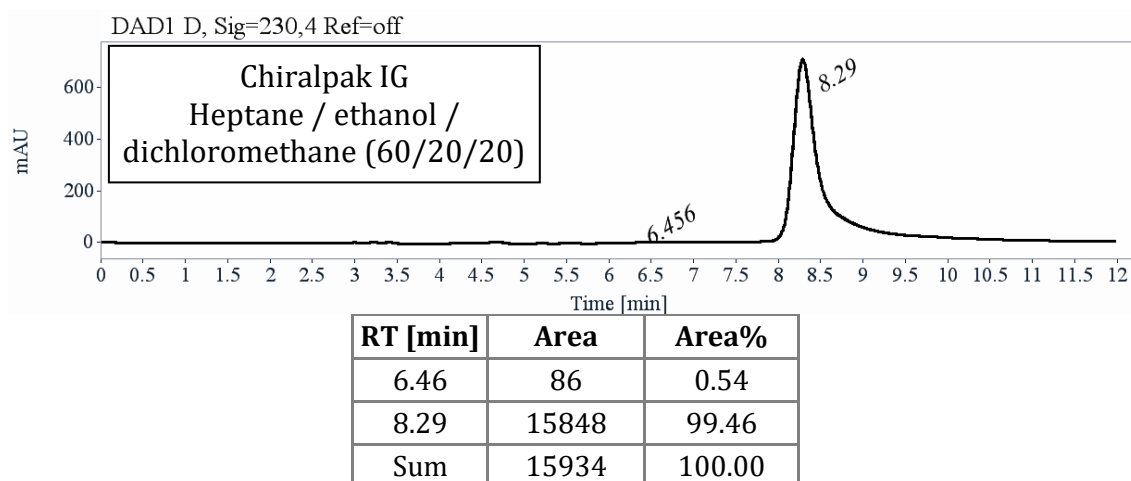

### Analytical chiral HPLC separation for compound 5

- The sample is dissolved in dichloromethane, injected on the chiral column, and detected with an UV detector at 230 nm and a polarimeter. The flow-rate is 1 mL/min.

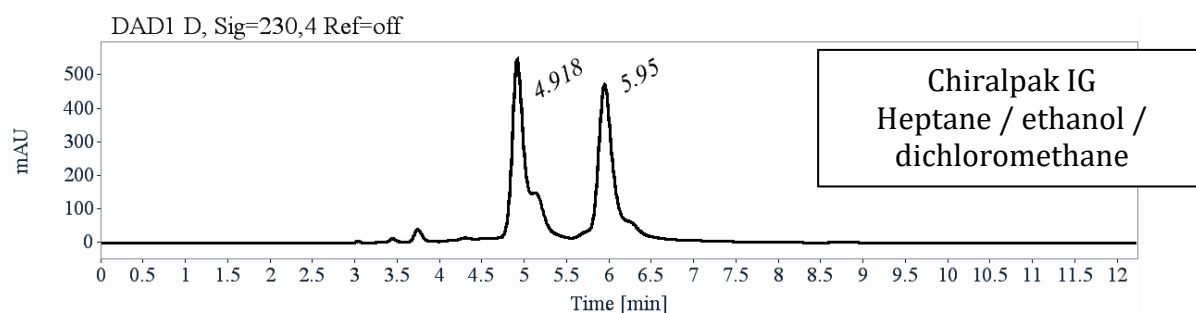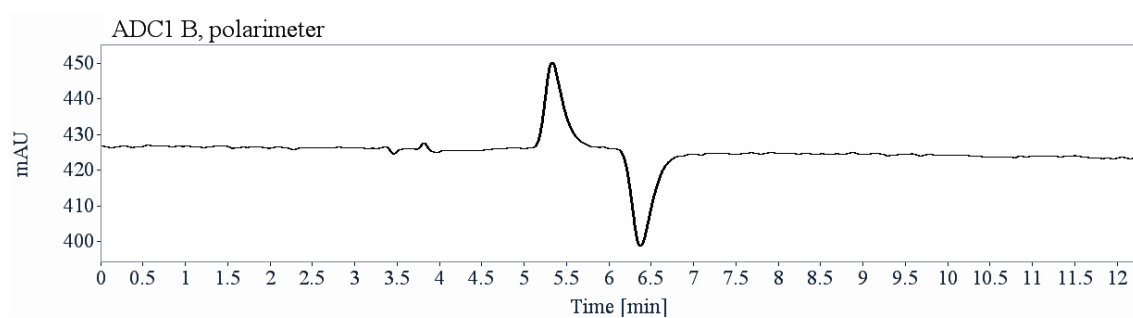

| RT [min] | Area  | Area%  | Capacity Factor | Enantioselectivity | Resolution (USP) |
|----------|-------|--------|-----------------|--------------------|------------------|
| 4.92     | 5179  | 44.57  | 0.67            |                    |                  |
| 5.95     | 6440  | 55.43  | 1.02            | 1.52               | 3.83             |
| Sum      | 11619 | 100.00 |                 |                    |                  |

**Preparative separation for compound 5:**

- Sample preparation: About 32 mg of compound 5 are dissolved in 4.5 mL of dichloromethane.
- Chromatographic conditions: Chiralpak IG (250 x 10 mm), hexane / ethanol / dichloromethane (60/20/20) as mobile phase, flow-rate = 5 mL/min, UV detection at 254 nm.
- Injections (stacked): 75 times 60  $\mu$ L, every 7.8 minutes.
- First fraction: 10 mg of the first eluted enantiomer with ee > 99.5%

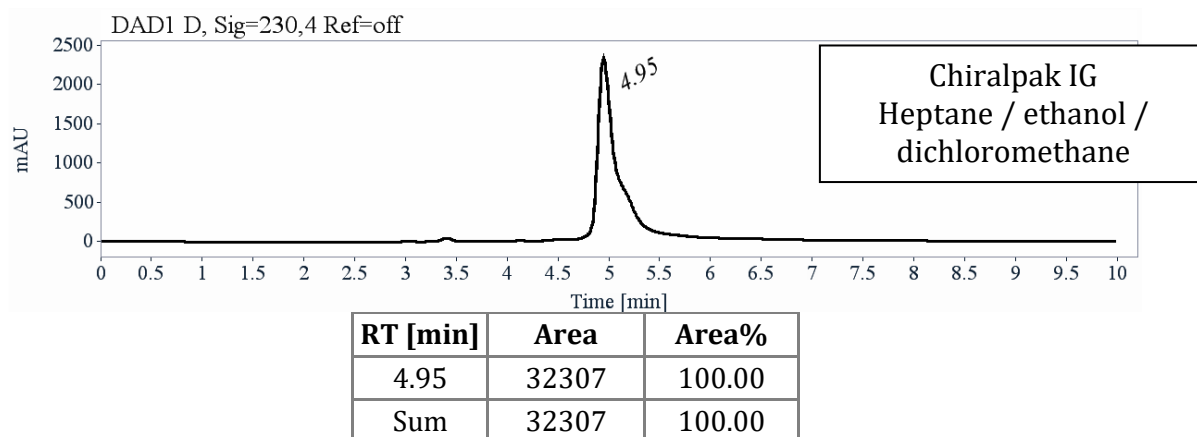

- Second fraction: 8 mg of the second eluted enantiomer with ee > 99.5 %

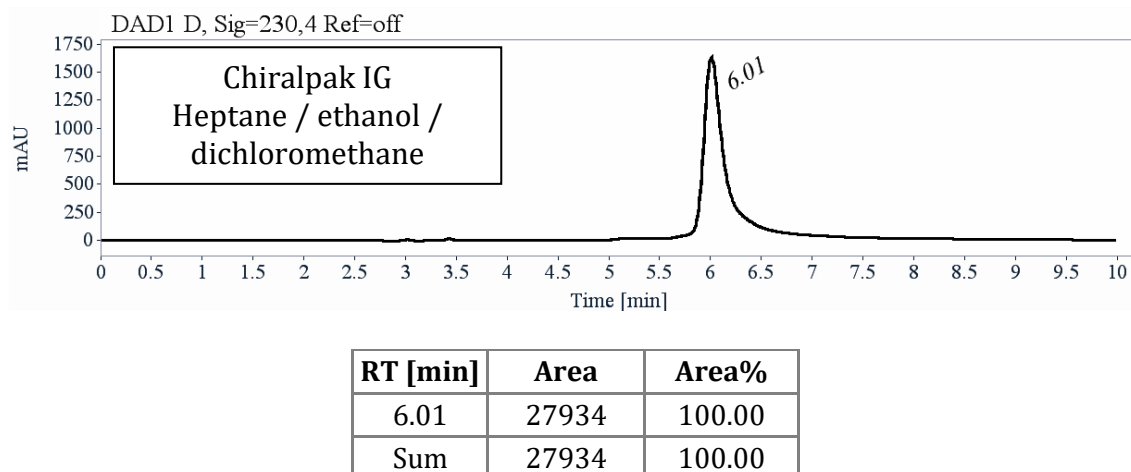

### Analytical chiral HPLC separation for compound 6

- The sample is dissolved in dichloromethane, injected on the chiral column, and detected with an UV detector at 230 nm and a polarimetric detector. The flow-rate is 1 mL/min.

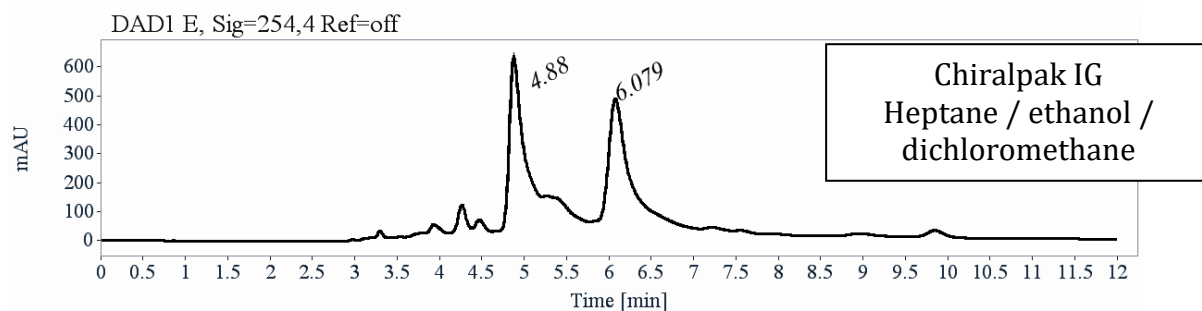

| RT [min] | Area  | Area%  | Capacity Factor | Enantioselectivity | Resolution (USP) |
|----------|-------|--------|-----------------|--------------------|------------------|
| 4.88     | 7573  | 47.56  | 0.65            |                    |                  |
| 6.08     | 8348  | 52.44  | 1.06            | 1.62               | 3.72             |
| Sum      | 15921 | 100.00 |                 |                    |                  |

### Preparative separation for compound 6:

- Sample preparation: About 9 mg of compound **6** are dissolved in 2.8 mL of dichloromethane.
- Chromatographic conditions: Chiralpak IG (250 x 10 mm), hexane / ethanol / dichloromethane (60/20/20) as mobile phase, flow-rate = 5 mL/min, UV detection at 254 nm.
- Injections (stacked): 40 times 70  $\mu$ L, every 7.6 minutes.
- First fraction: 3 mg of the first eluted enantiomer with ee > 99.5 %

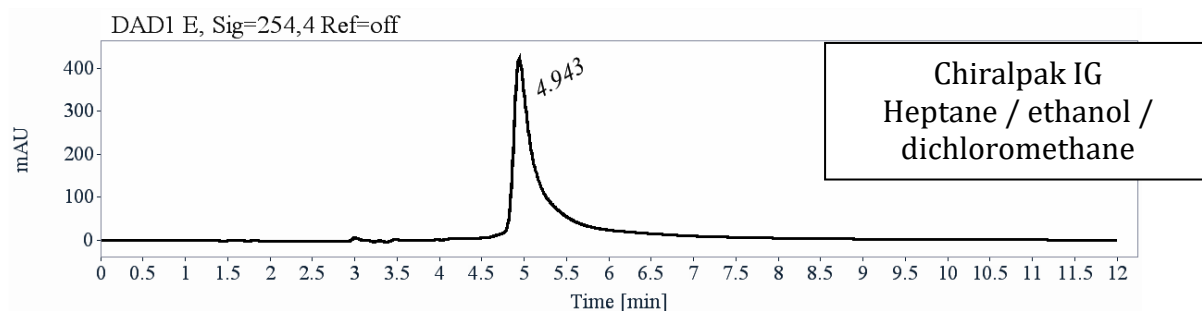

| RT [min] | Area | Area%  |
|----------|------|--------|
| 4.94     | 8269 | 100.00 |
| Sum      | 8269 | 100.00 |

- Second fraction: 2 mg of the second eluted enantiomer with ee > 99.5 %

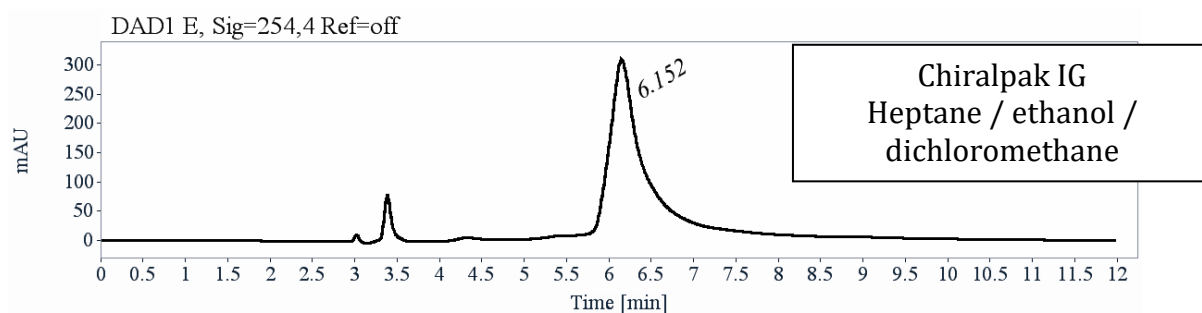

| RT [min] | Area | Area%  |
|----------|------|--------|
| 6.15     | 7077 | 100.00 |
| Sum      | 7077 | 100.00 |

### Analytical chiral HPLC separation for compound 5-acac

- The sample is dissolved in dichloromethane, injected on the chiral column, and detected with an UV detector at 254 nm and a circular dichroism detector at 254 nm. The flow-rate is 1 mL/min.

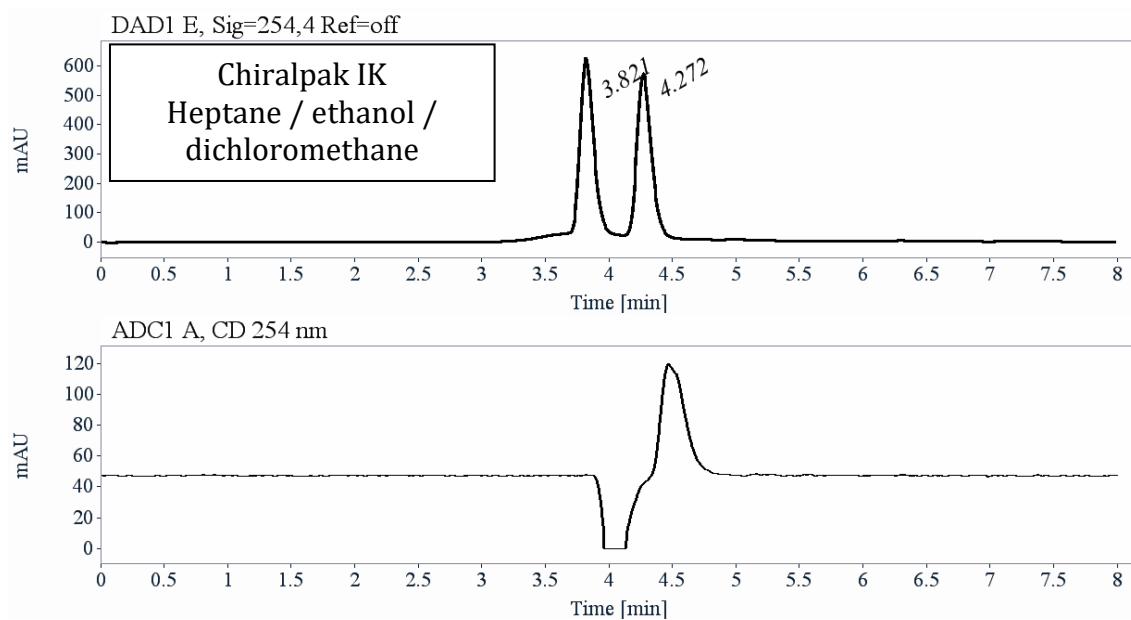

| RT [min] | Area | Area%  | Capacity Factor | Enantioselectivity | Resolution (USP) |
|----------|------|--------|-----------------|--------------------|------------------|
| 3.82     | 4359 | 50.13  | 0.30            |                    |                  |
| 4.27     | 4337 | 49.87  | 0.45            | 1.52               | 2.25             |
| Sum      | 8696 | 100.00 |                 |                    |                  |



### Preparative separation for compound 5-acac:

- Sample preparation: About 55 mg of compound **5-acac** are dissolved in 7 mL of a mixture of dichloromethane and hexane (50/50).
- Chromatographic conditions: Chiralpak IK (250 x 10 mm), hexane / ethanol / dichloromethane (60/20/20) as mobile phase, flow-rate = 5 mL/min, UV detection at 254 nm.
- Injections (stacked): 200 times 35  $\mu$ L, every 1.8 minutes.
- First fraction: 26 mg of the first eluted enantiomer with ee > 99.5 %

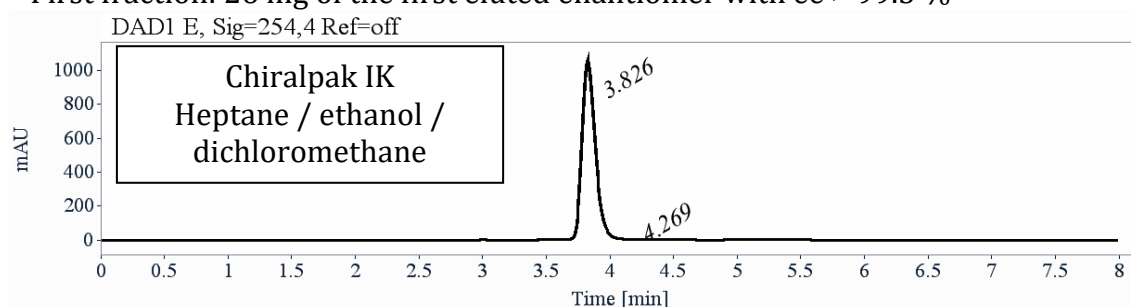

| RT [min] | Area | Area%  |
|----------|------|--------|
| 3.83     | 7691 | 99.91  |
| 4.27     | 7    | 0.09   |
| Sum      | 7698 | 100.00 |

- Second fraction: 26 mg of the second eluted enantiomer with ee > 98.5 %

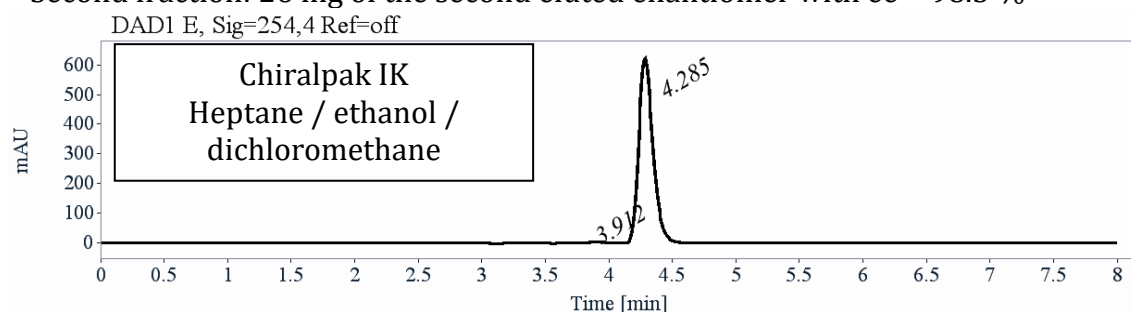

| RT [min] | Area | Area%  |
|----------|------|--------|
| 3.91     | 31   | 0.63   |
| 4.28     | 4841 | 99.37  |
| Sum      | 4872 | 100.00 |

### Analytical chiral HPLC separation for compound 6-acac

- The sample is dissolved in dichloromethane, injected on the chiral column, and detected with a UV detector at 254 nm and a circular dichroism detector at 254 nm. The flow-rate is 1 mL/min.

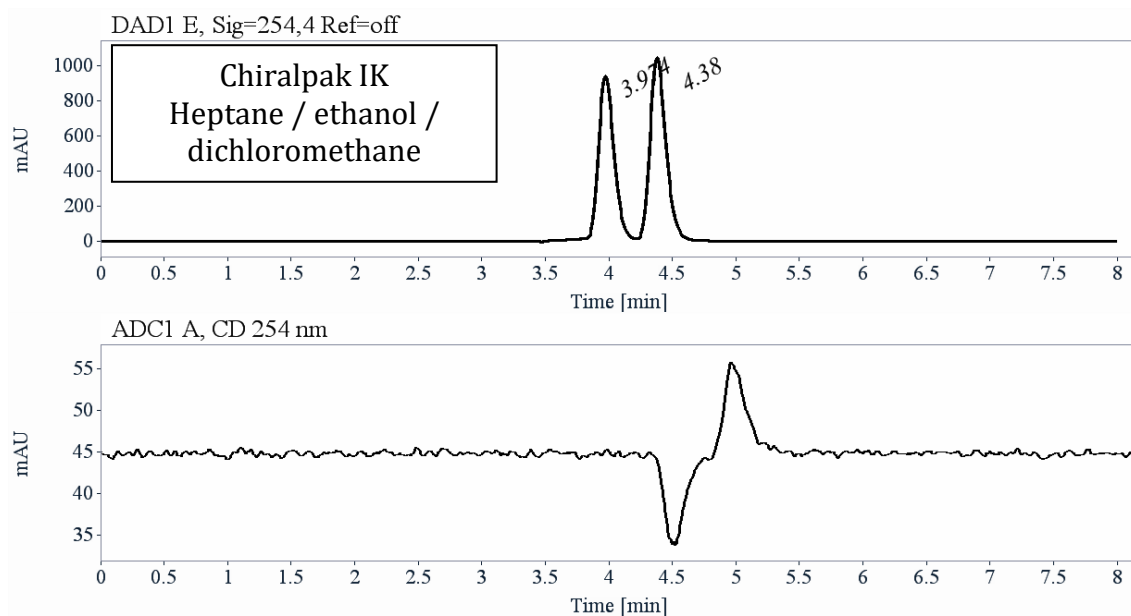

| RT [min] | Area  | Area%  | Capacity Factor | Enantioselectivity | Resolution (USP) |
|----------|-------|--------|-----------------|--------------------|------------------|
| 3.97     | 7900  | 46.43  | 0.35            |                    |                  |
| 4.38     | 9116  | 53.57  | 0.48            | 1.40               | 1.79             |
| Sum      | 17016 | 100.00 |                 |                    |                  |

**Preparative separation for compound 6-acac:**

- Sample preparation: About 18 mg of compound **6-acac** are dissolved in 4 mL of a mixture of dichloromethane and hexane (50/50).
- Chromatographic conditions: Chiralpak IK (250 x 10 mm), hexane / ethanol / dichloromethane (60/20/20) as mobile phase, flow-rate = 5 mL/min, UV detection at 254 nm.
- Injections (stacked): 80 times 50  $\mu$ L, every 1.8 minutes.
- First fraction: 9 mg of the first eluted enantiomer with ee > 99.5 %

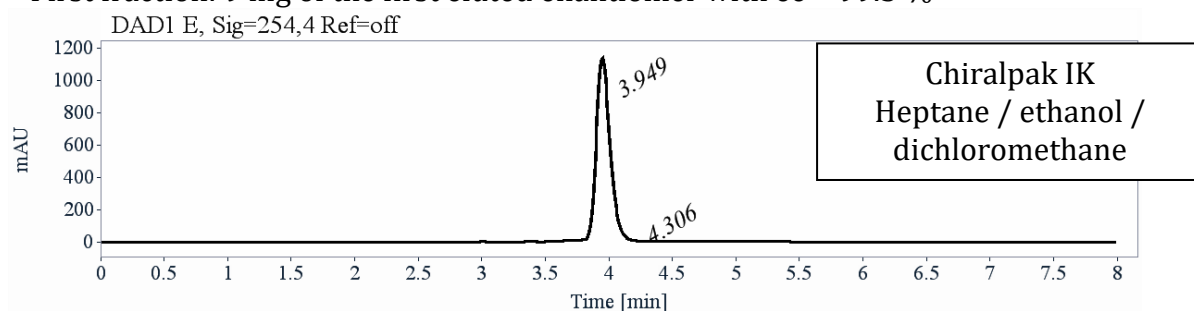

| RT [min] | Area | Area%  |
|----------|------|--------|
| 3.95     | 8571 | 99.86  |
| 4.31     | 12   | 0.14   |
| Sum      | 8584 | 100.00 |

- Second fraction: 9 mg of the second eluted enantiomer with ee > 99.5 %

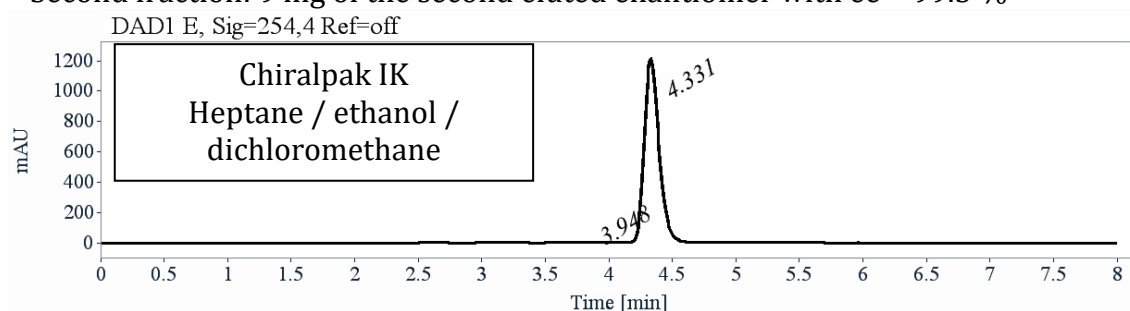

| RT [min] | Area | Area%  |
|----------|------|--------|
| 3.95     | 23   | 0.23   |
| 4.33     | 9814 | 99.77  |
| Sum      | 9837 | 100.00 |

## 7. Computational Methods

The total, transition energies, as well as the geometries and vibrations of all systems have been computed at the (Time-Dependent) Density Functional Theory (TD-DFT) level whereas the environmental effects have been modelled using the polarizable continuum model (PCM).<sup>[1]</sup> Toluene was considered as solvent as it is the solvent used in the emission experiments. No structure simplification was performed.

All calculations have been performed using the Gaussian16.A03 program,<sup>[2]</sup> but for the SOC calculations and related S-T gaps that have been achieved with ORCA.<sup>[3]</sup>

In Gaussian used tightened self-consistent field ( $10^{-10}$  a.u.) and geometry optimization ( $10^{-5}$  a.u.) convergence thresholds, and a large DFT integration grid (so-called *ultrafine* grid, a pruned 99,590 grid). These (TD-)DFT calculations relied on the M06-2X hybrid functional for absorption and emission.<sup>[3]</sup> The basis sets used for geometry optimization and frequency calculations are 6-311G(d,p) for all atoms, but Pt that was treated with LanL2TZ(f). Vertical absorption and emission transition energies were obtained adding diffuse orbitals on the “light” atoms, i.e., applying 6-311+G(d,p). The ground states were optimized with DFT, the lowest triplet with U-DFT and the lowest excited singlet with TD-DFT. The nature of the ground-state stationary points was confirmed by analytical Hessian calculations that returned 0 (minima) imaginary vibrational modes. The values reported below are vertical absorption and emission, as obtained by TD-DFT, whereas the phosphorescence vertical values were determined using  $\Delta$ SCF on the optimal T1 geometry.

The ECD spectra were simulated by convoluting the TD-DFT “stick” contributions with a Gaussian showing a HWHM of  $1400\text{ cm}^{-1}$ . For these calculations, we use the ground-state geometry determined above and the B3LYP functional.

Eventually the spin-orbit coupling elements were computed using the same M06-2X hybrid functional, the ZORA Hamiltonian, the *def2-TVP* basis set and the CPCM(SMD) solvent model for the calculations. TDA was used. The reported SOC values reported in the text have been computed as:

$$\sqrt{\frac{1}{3}S_x^2 + \frac{1}{3}S_y^2 + \frac{1}{3}S_z^2}$$

For the sake of consistency, the S-T gaps given in the main text when studying the ISC process have been computed with ORCA and the same methodology.

- [1] J. Tomasi, B. Mennucci, R. Cammi, *Chem. Rev.* **2005**, *105*, 2999–3094.  
[2] M. J. Frisch, G. W. Trucks, H. B. Schlegel, G. E. Scuseria, M. A. Robb, J. R. Cheeseman, G. Scalmani, V. Barone, B. Mennucci, G. A. Petersson, H. Nakatsuji, M. Caricato, X. Li, H. P. Hratchian, A. F. Izmaylov, J. Bloino, G. Zheng, J. L. Sonnenberg, M. Hada, M. Ehara, K. Toyota, R. Fukuda, J. Hasegawa, M. Ishida, T. Nakajima, Y. Honda, O. Kitao, H. Nakai, T. Vreven, J. A. Montgomery, Jr., J. E. Peralta, F. Ogliaro, M. Bearpark, J. J. Heyd, E. Brothers, K. N. Kudin, V. N. Staroverov, R. Kobayashi, J. Normand, K. Raghavachari, A. Rendell, J. C. Burant, S. S. Iyengar, J. Tomasi, M. Cossi, N. Rega, J. M. Millam, M. Klene, J. E. Knox, J. B. Cross, V. Bakken, C. Adamo, J. Jaramillo, R. Gomperts, R.

E. Stratmann, O. Yazyev, A. J. Austin, R. Cammi, C. Pomelli, J. W. Ochterski, R. L. Martin, K. Morokuma, V. G. Zakrzewski, G. A. Voth, P. Salvador, J. J. Dannenberg, S. Dapprich, A. D. Daniels, O. Farkas, J. B. Foresman, J. V. Ortiz, J. Cioslowski and D. J. Fox, Gaussian 16 Revision A.03, **2016**, Gaussian Inc. Wallingford CT.

[3] F. Neese, *WIREs Comput. Mol. Sci.* **2018**, *8*, e1327

[4] Y. Zhao and D. G. Truhlar, *Theor. Chem. Acc.*, **2008**, *120*, 215–241.

### EDD plots

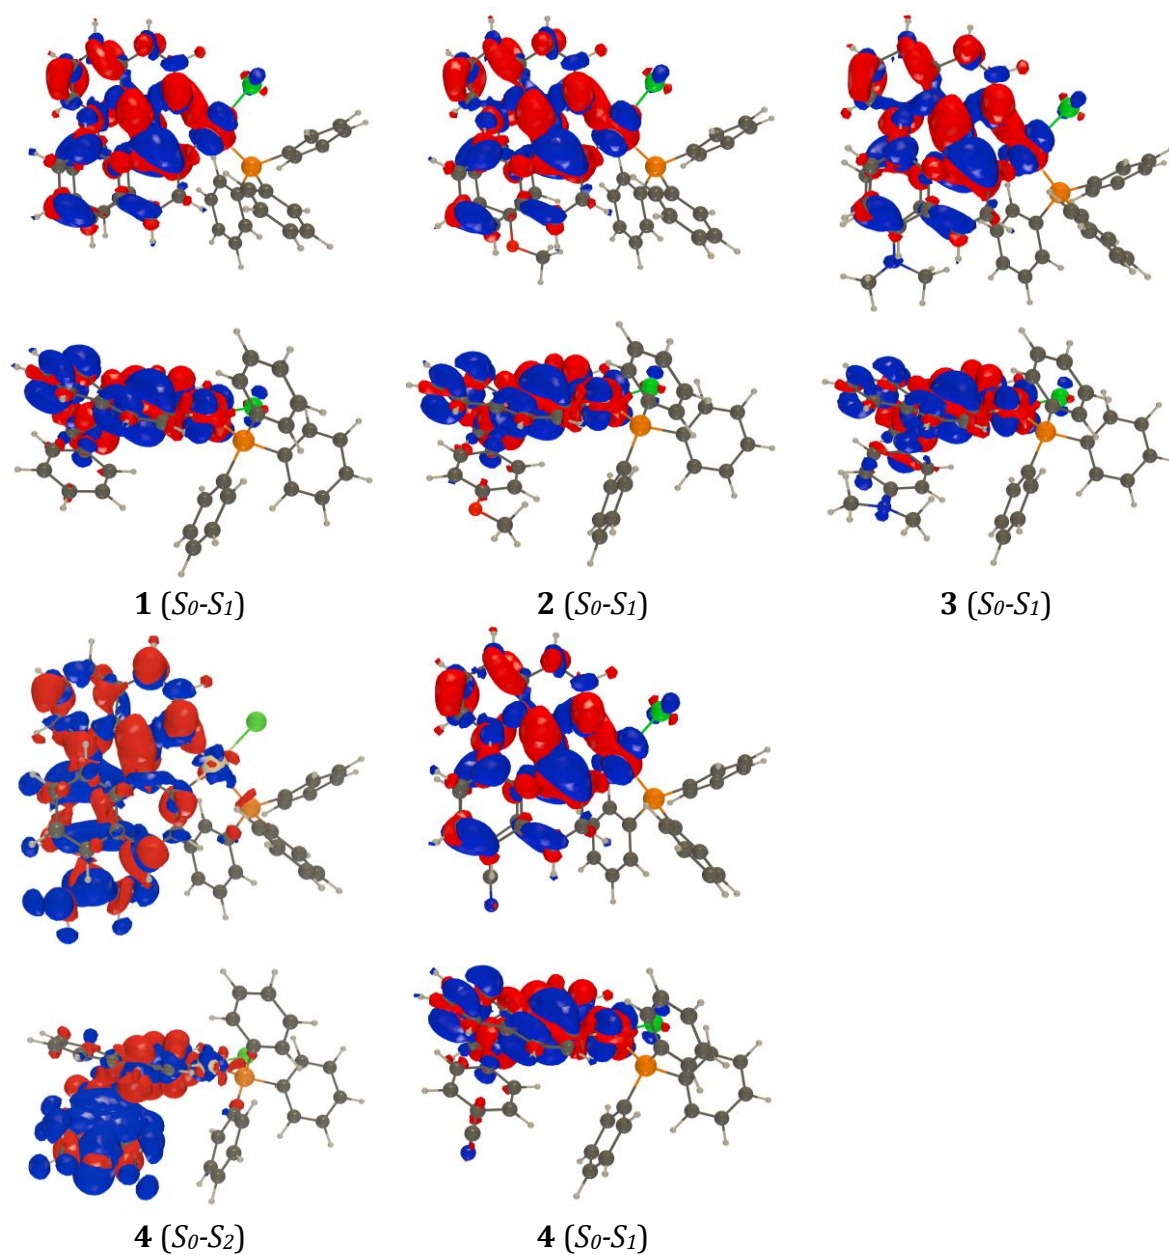

**Figure S34**: Electron density difference plots for the lowest absorption of complexes **1-4**. The blue and red lobes correspond to region of decrease and increase of density upon excitation, respectively. Contour threshold: 0.001 au. We present two views for all systems.

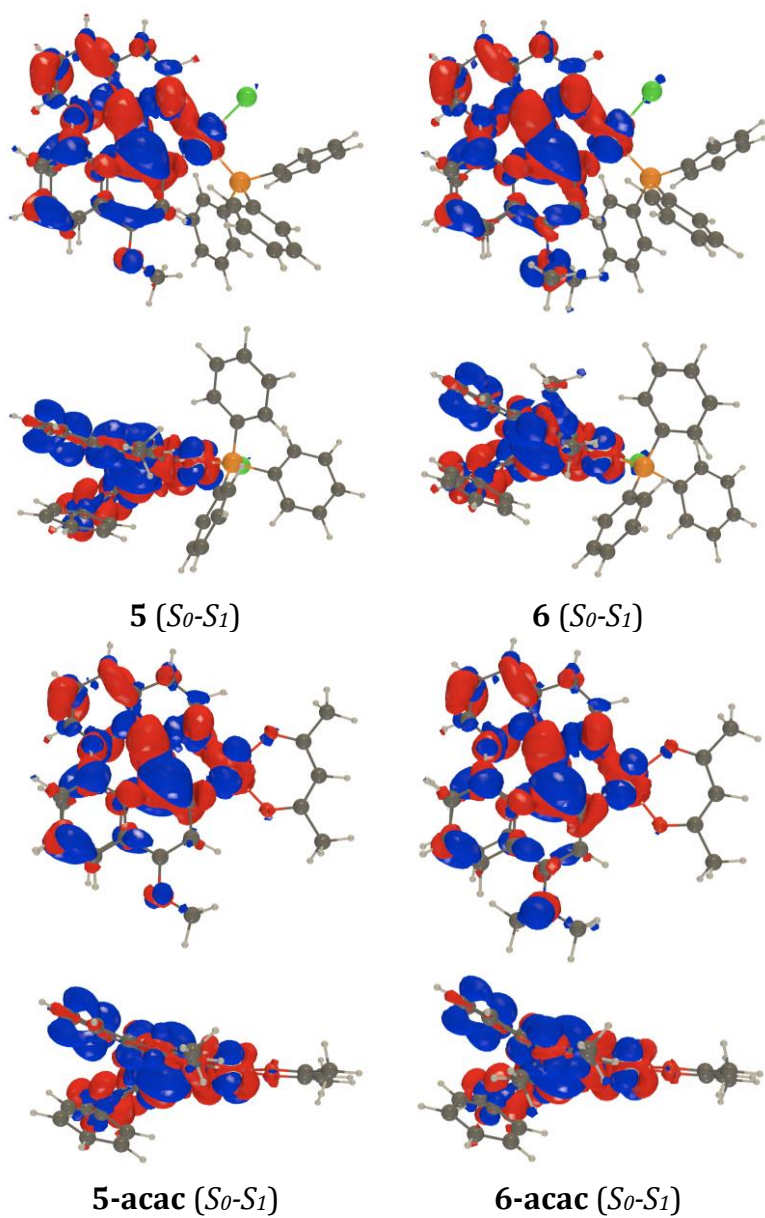

**Figure S35** : Electron density difference plots for the lowest absorption of complexes **5-6** and the corresponding **acac** series. See caption of Figure **S32** for more details.

**Table S1** : Main theoretical results. We report the key vertical absorption (in nm) together with the associated oscillator strength ( $f$ , in parenthesis), as well as the vertical fluorescence and phosphorescence wavelength (in nm). The two latter are always computed from the lowest singlet and triplet, respectively (transition applied only for absorption).

| Compound      | Transition | Absorption | Fluorescence | Phosphorescence |
|---------------|------------|------------|--------------|-----------------|
| <b>1</b>      | $S_0-S_1$  | 407 (0.14) | 514          | 819             |
| <b>2</b>      | $S_0-S_1$  | 405 (0.13) | 511          | 813             |
| <b>3</b>      | $S_0-S_1$  | 405 (0.13) | 510          | 815             |
|               | $S_0-S_2$  | 398 (0.17) |              |                 |
| <b>4</b>      | $S_0-S_1$  | 419 (0.13) | 515          | 812             |
| <b>5</b>      | $S_0-S_1$  | 428 (0.19) | 523          | -               |
| <b>6</b>      | $S_0-S_1$  | 430 (0.21) | 544          | 780             |
| <b>5-acac</b> | $S_0-S_1$  | 446 (0.22) | 528          | 747             |
| <b>6-acac</b> | $S_0-S_1$  | 459 (0.27) | 543          | 768             |



**Table S2** : Theoretical investigation of ISC. We report the  $S_1-T_1$  and  $S_1-T_2$  gaps (in eV) computed on the optimal  $S_1$  geometries together with the associated SOCs (in  $\text{cm}^{-1}$ ). For the gaps, a negative value indicate that the triplet is below the singlet.

| Compound      | Transition | Gap   | SOC   |
|---------------|------------|-------|-------|
| <b>1</b>      | $S_1-T_1$  | -0.77 | 14.1  |
|               | $S_1-T_2$  | +0.22 | 97.1  |
| <b>2</b>      | $S_1-T_1$  | -0.77 | 15.7  |
|               | $S_1-T_2$  | +0.12 | 94.0  |
| <b>3</b>      | $S_1-T_1$  | -0.77 | 16.2  |
|               | $S_1-T_2$  | -0.02 | 74.3  |
| <b>4</b>      | $S_1-T_1$  | -0.74 | 16.5  |
|               | $S_1-T_2$  | +0.22 | 98.1  |
| <b>5</b>      | $S_1-T_1$  | -0.73 | 10.7  |
|               | $S_1-T_2$  | +0.31 | 66.1  |
| <b>6</b>      | $S_1-T_1$  | -0.70 | 7.8   |
|               | $S_1-T_2$  | +0.34 | 53.0  |
| <b>5-acac</b> | $S_1-T_1$  | -0.71 | 22.5  |
|               | $S_1-T_2$  | +0.36 | 144.1 |
| <b>6-acac</b> | $S_1-T_1$  | -0.72 | 16.6  |
|               | $S_1-T_2$  | +0.40 | 59.3  |

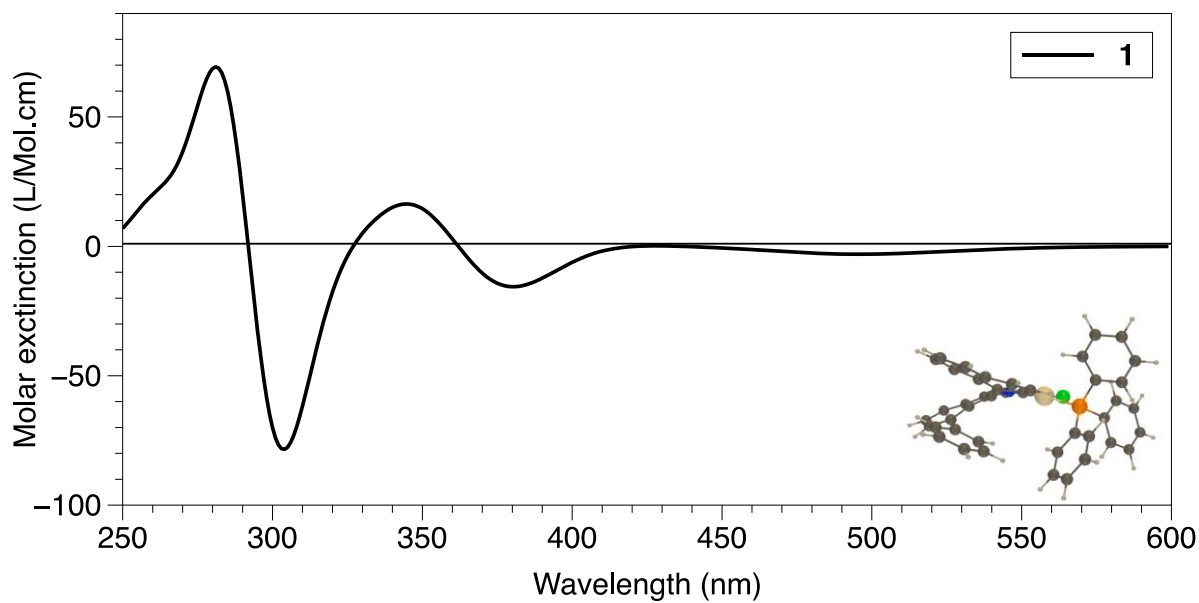

Figure S36 : Simulated ECD spectrum of **1**.

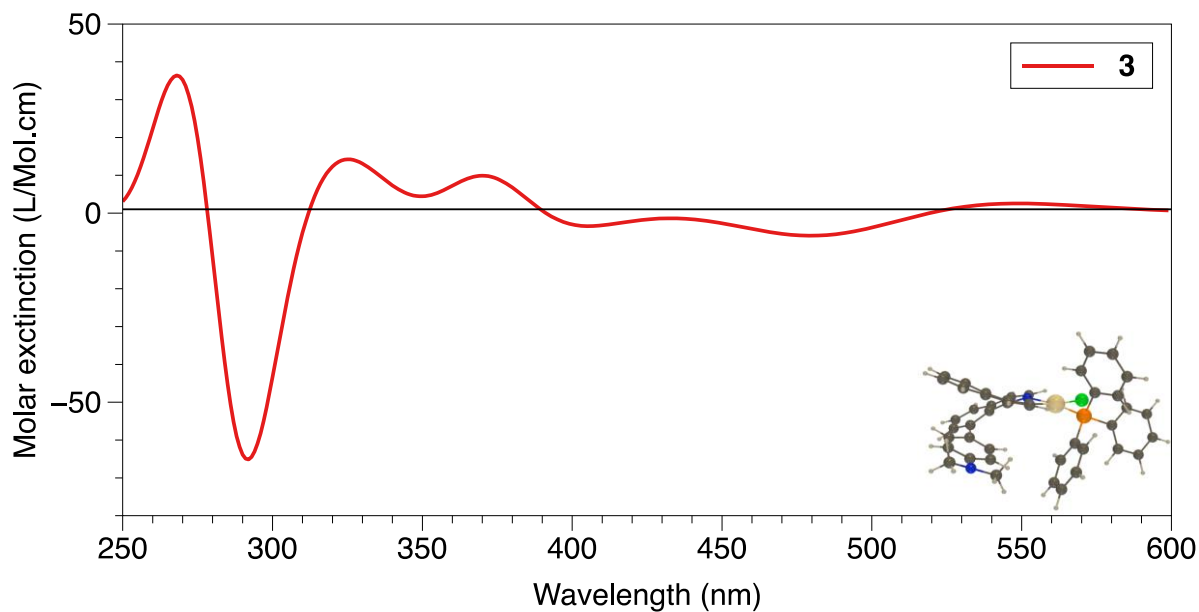

Figure S37 : Simulated ECD spectrum of **3**.

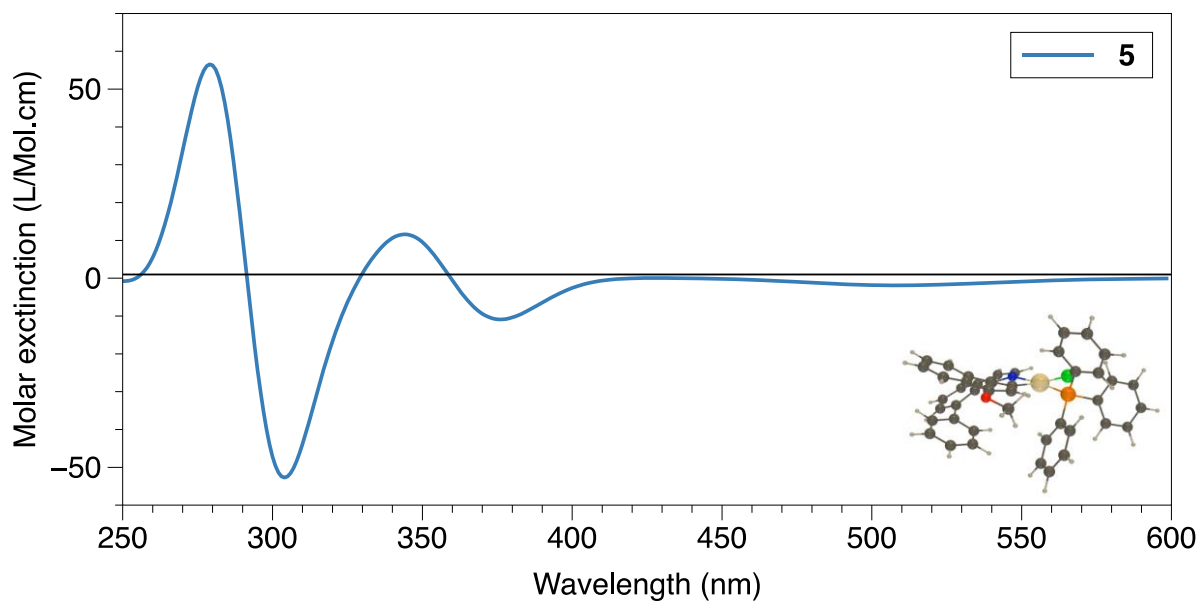

Figure S38 : Simulated ECD spectrum of 5.

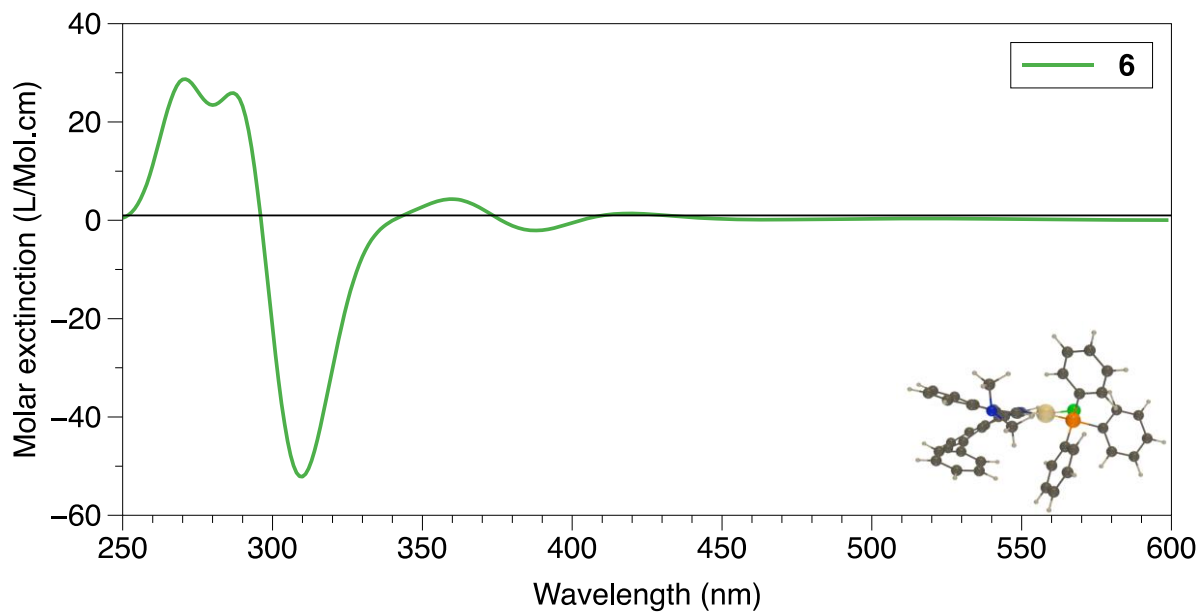

Figure S39 : Simulated ECD spectrum of 6.
